# Supplementary material for: Overexpression of ORAOV1 and its association with immunotherapy resistance in hepatocellular carcinoma
Source: PeerJ. 2025 Nov 25;13:e20390. doi: 10.7717/peerj.20390 (PMC12662064; doi:10.7717/peerj.20390)
Supplement: Supplemental Information 1 [file peerj-13-20390-s001.xlsx]

## Sheet: ORAOV1
Control	HCC		Paired t test
0.051	2.106		P value	<0.0001
0.053	2.208		P value summary	****
0.063	2.378		Significantly different (P < 0.05)?	Yes
0.09	2.869		One- or two-tailed P value?	Two-tailed
0.094	2.92		t, df	t=16.07, df=53
0.112	2.997		Number of pairs	54
0.113	3.023
0.148	3.031
0.149	3.218
0.157	3.292
0.184	3.303
0.245	3.349
0.264	3.42
0.281	3.481
0.286	3.504
0.286	3.572
0.286	3.578
0.296	3.752
0.316	3.984
0.41	4.06
0.482	4.352
0.519	4.387
0.563	4.885
0.563	5.129
0.566	5.233
0.625	5.319
0.645	5.585
0.686	5.635
0.773	5.747
0.792	5.803
0.865	5.934
0.872	6.547
0.893	6.585
0.978	6.626
1.03	6.834
1.179	7.035
1.188	7.048
1.232	7.187
1.369	7.209
1.427	7.317
1.492	7.412
1.494	7.6
1.525	7.845
1.646	8.253
1.677	8.299
1.703	8.339
1.723	8.792
1.784	9.2
1.851	9.953
1.962	10.251
1.988	10.438
1.994	12.507
2.013	13.498
2.022	15.52

## Sheet: Ki67
Control	HCC		Paired t test
0.043	0.183		P value	<0.0001
0.044	0.189		P value summary	****
0.045	0.189		Significantly different (P < 0.05)?	Yes
0.047	0.192		One- or two-tailed P value?	Two-tailed
0.048	0.198		t, df	t=7.155, df=53
0.05	0.202		Number of pairs	54
0.054	0.208
0.057	0.212
0.063	0.224
0.064	0.228
0.065	0.233
0.069	0.243
0.069	0.249
0.07	0.251
0.071	0.256
0.072	0.26
0.073	0.299
0.074	0.302
0.074	0.304
0.075	0.304
0.078	0.309
0.083	0.313
0.087	0.328
0.093	0.335
0.097	0.349
0.099	0.361
0.101	0.367
0.105	0.415
0.108	0.472
0.109	0.49
0.11	0.493
0.112	0.56
0.115	0.56
0.116	0.571
0.117	0.579
0.117	0.582
0.121	0.668
0.127	0.771
0.13	0.802
0.132	0.949
0.135	0.955
0.137	0.959
0.139	1.038
0.139	1.265
0.14	1.289
0.149	1.296
0.154	1.347
0.161	1.577
0.163	1.612
0.17	1.891
0.17	1.973
0.171	2.143
0.172	2.248
0.175	3.076
