# Supplementary material for: Overexpression of ORAOV1 and its association with immunotherapy resistance in hepatocellular carcinoma
Source: PeerJ. 2025 Nov 25;13:e20390. doi: 10.7717/peerj.20390 (PMC12662064; doi:10.7717/peerj.20390)
Supplement: Supplemental Information 2 [file peerj-13-20390-s002.xlsx]

## Sheet: Captions
Supplementary Table S1-S9
Table S1	The primer sequences
Table S2	103 upregulated miRNAs and 198 downregulated miRNA
Table S3	The predicted 72 upstream miRNAs of ORAOV1 using starBase database
Table S4	17 miRNAs that may be related to the enhanced ORAOV1 expression in HCC
Table S5	The co-expression analysis of the another 15 miRNAs
Table S6	495 upregulated lncRNAs and 160 downregulated lncRNAs in HCC patients with the thresholds |log2FC| >1.5, adj. p value < 0.05
Table S7	14 upstream lncRNAs of hsa-miR-100-5p predicted using the starBase database
Table S8	The ORAOV1-Related DEmRNAs
Table S9	The top 15 significantly enriched GO terms and KEGG pathways
Table S10	The analysis speculated that ORAOV1 interacted with TPCN2 and CCND1 with overall scores of 0.566 and 0.524, respectively

## Sheet: Table S1
Genes	Primers
ORAOV1	F: 5′-GGTATCGGGAAGGCTATGAAGA-3′
	R: 5′-TGCAGTAGACATTTCCATGCAA-3′
KI 67	F: 5′-ACGCCTGGTTACTATCAAAAGG-3′
	R: 5′-CAGACCCATTTACTTGTGTTGGA-3′
GAPDH	F: 5′-GGAGCGAGATCCCTCCAAAAT-3′
	R: 5′-GGCTGTTGTCATACTTCTCATGG-3′

## Sheet: Table S2
103 upregulated miRNAs								198 downregulated miRNA
ID	logFC	AveExpr	t	P.Value	adj.P.Val	B		ID	logFC	AveExpr	t	P.Value	adj.P.Val	B
hsa-miR-21-5p	1.51511	17.5255	13.1962	1.97e-33	4.75e-31	65.1692		hsa-miR-1258	-3.11682	1.1123	-21.167	6.46e-68	1.4e-64	143.773
hsa-miR-93-5p	1.42518	12.278	11.1359	2.27e-25	2.59e-23	46.8159		hsa-miR-490-3p	-2.56588	0.769648	-19.7361	1.39e-61	1.51e-58	129.341
hsa-miR-10b-5p	2.87756	13.0725	10.2076	5.72e-22	3.77e-20	39.0822		hsa-miR-4686	-0.766529	0.140198	-17.88	2.17e-53	1.26e-50	110.665
hsa-miR-589-5p	1.16171	6.42162	10.1113	1.26e-21	7.83e-20	38.3026		hsa-miR-490-5p	-0.53921	0.0927854	-17.8734	2.32e-53	1.26e-50	110.599
hsa-miR-224-5p	2.6094	6.29804	9.07882	4.53e-18	1.93e-16	30.2343		hsa-miR-7704	-1.80945	0.857324	-17.4401	1.85e-51	8.02e-49	106.265
hsa-miR-10b-3p	1.84133	2.41965	9.02549	6.81e-18	2.84e-16	29.8329		hsa-miR-424-5p	-2.6495	6.83407	-17.1005	5.64e-50	2.04e-47	102.879
hsa-miR-4746-5p	1.2272	1.83671	8.68816	8.66e-17	2.98e-15	27.331		hsa-miR-139-3p	-2.44131	4.49357	-14.3616	3.1e-38	9.61e-36	76.1154
hsa-miR-500a-3p	1.19556	8.29856	8.50496	3.35e-16	1.1e-14	25.9998		hsa-miR-5701	-0.737048	0.232269	-13.2895	8.23e-34	2.23e-31	66.032
hsa-miR-532-5p	1.03585	10.2851	8.27309	1.81e-15	5.45e-14	24.3435		hsa-miR-424-3p	-1.44645	1.99733	-12.7199	1.63e-31	3.54e-29	60.7998
hsa-miR-7706	0.882736	1.53387	8.12284	5.3e-15	1.55e-13	23.2877		hsa-miR-144-3p	-2.68124	3.23399	-12.3835	3.53e-30	6.98e-28	57.7573
hsa-miR-660-5p	0.996123	6.2037	7.83932	3.88e-14	1.03e-12	21.3339		hsa-miR-101-3p	-1.47603	14.1995	-12.2732	9.62e-30	1.74e-27	56.7673
hsa-miR-34a-5p	1.05718	8.19277	7.81192	4.69e-14	1.2e-12	21.1479		hsa-miR-26b-3p	-1.22754	4.79735	-11.634	2.93e-27	4.54e-25	51.1141
hsa-miR-452-5p	1.88748	7.19662	7.722	8.71e-14	2.15e-12	20.5405		hsa-miR-139-5p	-2.0931	6.66556	-11.5499	6.14e-27	8.9e-25	50.3816
hsa-miR-221-3p	1.11322	6.65236	7.39673	7.83e-13	1.74e-11	18.3878		hsa-miR-3653-3p	-1.52918	2.34631	-11.5061	9.03e-27	1.23e-24	50.0014
hsa-miR-103a-3p	0.776838	14.6035	7.1805	3.25e-12	6.85e-11	16.9959		hsa-miR-1248	-0.812685	0.429143	-11.4717	1.22e-26	1.56e-24	49.7028
hsa-miR-96-5p	1.85409	2.67017	7.0954	5.63e-12	1.16e-10	16.457		hsa-miR-33b-5p	-2.02308	2.68311	-11.2911	5.91e-26	7.13e-24	48.1443
hsa-miR-1266-5p	1.22303	2.53498	6.99838	1.05e-11	2.09e-10	15.8486		hsa-miR-3607-3p	-2.19285	5.61943	-10.9566	1.06e-24	1.15e-22	45.2931
hsa-miR-423-5p	0.67407	5.90535	6.76472	4.57e-11	8.64e-10	14.4108		hsa-miR-30e-3p	-1.21574	12.8495	-10.9478	1.14e-24	1.18e-22	45.2181
hsa-miR-222-3p	1.03444	4.6309	6.75983	4.72e-11	8.77e-10	14.381		hsa-miR-450a-5p	-1.50138	3.16081	-10.932	1.31e-24	1.29e-22	45.085
hsa-miR-501-3p	0.981617	5.70019	6.75372	4.9e-11	8.89e-10	14.344		hsa-miR-326	-1.57324	2.2386	-10.7954	4.19e-24	3.96e-22	43.9349
hsa-miR-1307-3p	0.872198	10.4342	6.75327	4.91e-11	8.89e-10	14.3413		hsa-miR-542-5p	-1.08761	1.43457	-10.7881	4.46e-24	4.04e-22	43.8738
hsa-miR-140-3p	0.541665	10.5694	6.66691	8.38e-11	1.44e-09	13.8204		hsa-miR-511-5p	-1.5999	3.57409	-10.6106	2e-23	1.74e-21	42.3926
hsa-miR-452-3p	1.4109	2.90891	6.56365	1.57e-10	2.59e-09	13.2048		hsa-miR-26a-5p	-0.991633	11.0923	-10.5452	3.46e-23	2.89e-21	41.8502
hsa-miR-183-5p	2.32457	10.1277	6.39183	4.43e-10	7.07e-09	12.1976		hsa-miR-195-5p	-1.80301	4.71254	-10.512	4.57e-23	3.68e-21	41.5759
hsa-miR-25-3p	0.63426	13.135	6.34485	5.85e-10	9.2e-09	11.926		hsa-miR-24-1-5p	-1.25697	4.23844	-10.4888	5.55e-23	4.31e-21	41.3842
hsa-miR-188-5p	0.775466	1.96739	6.31662	6.91e-10	1.06e-08	11.7636		hsa-miR-369-5p	-2.05206	1.89412	-10.4383	8.47e-23	6.34e-21	40.9682
hsa-miR-1301-3p	0.975354	3.16359	6.26062	9.6e-10	1.44e-08	11.4433		hsa-miR-26b-5p	-1.13192	10.0835	-10.3192	2.28e-22	1.65e-20	39.9917
hsa-miR-362-3p	0.615496	2.1411	6.11579	2.23e-09	3.22e-08	10.6256		hsa-let-7c-3p	-1.78123	3.13317	-10.232	4.68e-22	3.28e-20	39.2804
hsa-miR-1180-3p	1.069	4.26896	6.10471	2.37e-09	3.41e-08	10.5638		hsa-miR-542-3p	-1.32666	7.80322	-10.222	5.08e-22	3.45e-20	39.1998
hsa-miR-877-5p	0.72919	1.33069	5.97665	4.92e-09	6.72e-08	9.85519		hsa-miR-33b-3p	-0.875327	0.673535	-10.1486	9.29e-22	5.94e-20	38.6041
hsa-miR-501-5p	0.758861	2.00612	5.87	8.95e-09	1.19e-07	9.27473		hsa-miR-214-3p	-1.68907	1.75373	-10.0564	1.98e-21	1.19e-19	37.8598
hsa-miR-182-5p	1.97072	11.7201	5.86802	9.05e-09	1.2e-07	9.26405		hsa-miR-30c-1-3p	-0.912752	1.31412	-10.0271	2.51e-21	1.47e-19	37.6246
hsa-miR-106b-5p	0.643471	7.91448	5.76285	1.62e-08	2.09e-07	8.70045		hsa-miR-335-5p	-1.46972	3.2331	-9.98088	3.65e-21	2.09e-19	37.2536
hsa-miR-589-3p	0.611192	1.35588	5.75308	1.71e-08	2.18e-07	8.64857		hsa-miR-29c-3p	-1.44939	10.7771	-9.95181	4.63e-21	2.58e-19	37.0209
hsa-miR-103a-2-5p	0.596634	1.18366	5.73305	1.9e-08	2.38e-07	8.54234		hsa-miR-5589-5p	-2.39507	2.53292	-9.80927	1.46e-20	7.75e-19	35.886
hsa-miR-4661-5p	1.02008	2.48754	5.69605	2.33e-08	2.86e-07	8.34703		hsa-miR-3607-5p	-0.606312	0.3699	-9.78773	1.74e-20	8.99e-19	35.7154
hsa-miR-1269a	3.30634	5.7217	5.65691	2.88e-08	3.46e-07	8.14157		hsa-let-7c-5p	-1.73691	10.9157	-9.67521	4.28e-20	2.11e-18	34.8279
hsa-miR-3677-3p	0.82346	1.94858	5.59576	4e-08	4.75e-07	7.82297		hsa-miR-125b-2-3p	-1.60622	4.39406	-9.3531	5.43e-19	2.62e-17	32.3234
hsa-miR-502-3p	0.60376	3.66367	5.59488	4.02e-08	4.75e-07	7.81838		hsa-let-7g-3p	-1.09101	4.67104	-9.26619	1.07e-18	5.04e-17	31.657
hsa-miR-30d-5p	0.717771	13.5594	5.56594	4.69e-08	5.48e-07	7.66869		hsa-miR-130a-3p	-1.48991	5.51131	-9.25396	1.17e-18	5.43e-17	31.5635
hsa-miR-500b-3p	0.582562	1.43472	5.53146	5.64e-08	6.48e-07	7.49121		hsa-miR-6503-5p	-0.515756	0.35658	-9.23097	1.4e-18	6.35e-17	31.3881
hsa-miR-671-5p	0.612157	1.96176	5.50426	6.51e-08	7.41e-07	7.35181		hsa-miR-10a-3p	-0.94083	1.09267	-9.13882	2.86e-18	1.27e-16	30.6878
hsa-miR-19a-3p	1.04611	5.40093	5.46319	8.09e-08	9.1e-07	7.14252		hsa-miR-125b-5p	-1.3621	8.9987	-9.12984	3.06e-18	1.33e-16	30.6198
hsa-miR-500b-5p	0.656248	2.55975	5.41926	1.02e-07	1.13e-06	6.92016		hsa-let-7b-3p	-1.15256	3.90842	-9.01343	7.47e-18	3.06e-16	29.7424
hsa-miR-500a-5p	0.655691	2.55926	5.41258	1.05e-07	1.17e-06	6.88651		hsa-miR-99a-3p	-1.17025	2.00258	-8.994	8.66e-18	3.48e-16	29.5966
hsa-miR-20a-5p	0.895909	9.09135	5.25831	2.34e-07	2.47e-06	6.11885		hsa-miR-3614-5p	-1.15114	1.63812	-8.89268	1.87e-17	7.37e-16	28.8402
hsa-miR-34c-5p	0.819463	0.938178	5.25746	2.35e-07	2.47e-06	6.11467		hsa-miR-497-5p	-1.32665	3.99934	-8.88299	2.01e-17	7.79e-16	28.7681
hsa-miR-224-3p	0.974323	2.34529	5.24414	2.51e-07	2.62e-06	6.04928		hsa-miR-29c-5p	-1.08059	4.65994	-8.87191	2.18e-17	8.32e-16	28.6858
hsa-miR-3127-5p	0.594482	1.86801	5.21035	2.98e-07	3.07e-06	5.88414		hsa-miR-101-5p	-0.948748	3.07594	-8.79327	3.95e-17	1.48e-15	28.1036
hsa-miR-190b-5p	0.657071	0.755911	5.19834	3.17e-07	3.24e-06	5.82564		hsa-miR-199b-3p	-2.32794	9.23073	-8.77437	4.55e-17	1.67e-15	27.9642
hsa-miR-3200-3p	0.955273	1.68668	5.13663	4.32e-07	4.34e-06	5.52705		hsa-miR-450b-5p	-1.23378	3.68467	-8.76376	4.92e-17	1.78e-15	27.8861
hsa-miR-135a-5p	1.19859	1.50296	5.09816	5.23e-07	5.19e-06	5.34245		hsa-miR-199a-3p	-2.32357	9.23741	-8.76203	4.99e-17	1.78e-15	27.8734
hsa-miR-301a-3p	0.745839	2.69038	5.08481	5.59e-07	5.52e-06	5.27868		hsa-miR-30a-3p	-1.52979	11.837	-8.72896	6.39e-17	2.24e-15	27.6302
hsa-miR-3144-3p	0.528116	0.515643	5.04969	6.65e-07	6.5e-06	5.11168		hsa-miR-455-3p	-1.40886	9.29271	-8.64221	1.22e-16	4.13e-15	26.9953
hsa-miR-421	0.635762	1.85689	5.0417	6.91e-07	6.72e-06	5.07381		hsa-miR-451a	-2.1092	8.71353	-8.55538	2.31e-16	7.73e-15	26.3642
hsa-miR-4326	0.879614	2.29295	4.97175	9.74e-07	9.32e-06	4.7446		hsa-miR-378a-5p	-1.54728	6.77746	-8.50037	3.47e-16	1.12e-14	25.9667
hsa-miR-454-3p	0.595987	2.84147	4.93658	1.16e-06	1.08e-05	4.58066		hsa-miR-5589-3p	-1.93931	2.25544	-8.34041	1.11e-15	3.55e-14	24.821
hsa-miR-3662	0.559845	0.676508	4.87224	1.57e-06	1.44e-05	4.28335		hsa-miR-145-5p	-1.49474	9.73579	-8.33633	1.15e-15	3.61e-14	24.7921
hsa-miR-891a-5p	1.1775	1.28649	4.81552	2.06e-06	1.84e-05	4.02417		hsa-miR-23b-5p	-0.650751	1.10408	-8.32829	1.21e-15	3.77e-14	24.7349
hsa-miR-34c-3p	0.61949	0.812843	4.75229	2.78e-06	2.46e-05	3.73844		hsa-miR-10a-5p	-1.49335	13.4721	-8.28147	1.7e-15	5.21e-14	24.4028
hsa-miR-767-5p	1.86168	1.68054	4.711	3.37e-06	2.94e-05	3.55366		hsa-miR-378c	-1.41699	4.00268	-8.21098	2.82e-15	8.4e-14	23.9054
hsa-miR-105-5p	2.01118	1.86824	4.70476	3.47e-06	3e-05	3.52584		hsa-miR-30c-2-3p	-1.35219	5.27781	-8.1149	5.61e-15	1.62e-13	23.2324
hsa-miR-301b-3p	0.53587	0.937142	4.67649	3.96e-06	3.4e-05	3.40035		hsa-miR-503-3p	-0.671171	0.80079	-8.10321	6.09e-15	1.74e-13	23.1509
hsa-miR-122b-5p	0.782573	1.37757	4.66997	4.08e-06	3.49e-05	3.37146		hsa-miR-3648	-0.850815	0.719352	-8.07634	7.37e-15	2.08e-13	22.9638
hsa-miR-1251-5p	0.799573	0.761217	4.4755	9.87e-06	7.77e-05	2.52761		hsa-miR-376a-2-5p	-0.597201	0.347369	-7.92447	2.14e-14	5.82e-13	21.9154
hsa-miR-18a-5p	0.895536	3.93769	4.45959	1.06e-05	8.31e-05	2.45999		hsa-miR-411-5p	-1.77188	2.64139	-7.92027	2.21e-14	5.92e-13	21.8866
hsa-miR-1269b	2.17036	2.52048	4.37608	1.53e-05	0.000116733	2.10879		hsa-miR-27b-3p	-0.844786	11.064	-7.82603	4.25e-14	1.11e-12	21.2437
hsa-miR-17-5p	0.727144	9.32748	4.35339	1.69e-05	0.000126768	2.01437		hsa-miR-675-3p	-2.723	6.01815	-7.81573	4.57e-14	1.18e-12	21.1737
hsa-miR-4652-5p	1.03414	0.924111	4.33696	1.82e-05	0.000134237	1.9463		hsa-miR-130a-5p	-0.59253	0.602449	-7.80974	4.76e-14	1.2e-12	21.1331
hsa-miR-508-3p	0.971541	2.10193	4.26878	2.44e-05	0.000176619	1.66635		hsa-miR-99a-5p	-1.52408	9.33715	-7.72199	8.71e-14	2.15e-12	20.5404
hsa-miR-425-5p	0.567791	7.30823	4.09672	5.04e-05	0.000351064	0.977992		hsa-miR-486-5p	-1.75191	6.66447	-7.68686	1.11e-13	2.7e-12	20.3046
hsa-miR-514a-3p	0.828397	1.58977	4.07341	5.55e-05	0.000385388	0.886735		hsa-miR-214-5p	-1.70748	3.10464	-7.6004	2e-13	4.82e-12	19.7275
hsa-miR-362-5p	0.643943	4.38891	4.0419	6.32e-05	0.000434607	0.764106		hsa-miR-142-3p	-1.39858	10.1988	-7.59102	2.13e-13	5.08e-12	19.6652
hsa-miR-9-5p	1.30241	7.94097	4.01028	7.2e-05	0.00048688	0.642001		hsa-miR-122-3p	-1.70905	7.12519	-7.54368	2.93e-13	6.91e-12	19.3517
hsa-miR-19b-3p	0.638394	7.5684	3.9848	7.98e-05	0.000535032	0.544201		hsa-miR-505-3p	-1.17682	5.88796	-7.52577	3.3e-13	7.72e-12	19.2334
hsa-miR-1270	0.619587	1.17893	3.96901	8.51e-05	0.000565113	0.483901		hsa-miR-142-5p	-1.40635	5.6093	-7.52068	3.42e-13	7.9e-12	19.1998
hsa-miR-184	1.17429	1.6369	3.89947	0.000112457	0.000729127	0.220972		hsa-miR-1247-3p	-2.41897	2.54678	-7.45071	5.47e-13	1.25e-11	18.7401
hsa-miR-5586-5p	0.551466	1.80994	3.80781	0.000161427	0.00101087	-0.11898		hsa-let-7i-3p	-0.997924	5.02227	-7.44155	5.81e-13	1.31e-11	18.6802
hsa-miR-130b-3p	0.603625	4.46667	3.56375	0.000408217	0.00236439	-0.987339		hsa-miR-4510	-0.613798	0.736006	-7.41674	6.86e-13	1.54e-11	18.5182
hsa-miR-937-3p	0.533381	1.50513	3.56296	0.000409405	0.00236497	-0.990049		hsa-miR-29a-3p	-0.883603	12.7482	-7.23677	2.25e-12	4.85e-11	17.355
hsa-miR-767-3p	0.511777	0.452584	3.53485	0.000454075	0.00260225	-1.08656		hsa-miR-383-5p	-1.74425	1.33067	-7.23632	2.26e-12	4.85e-11	17.3522
hsa-miR-2114-5p	0.616578	0.913764	3.52835	0.000465045	0.00265112	-1.1088		hsa-miR-378d	-0.949011	1.28932	-7.23402	2.29e-12	4.88e-11	17.3375
hsa-miR-509-3p	0.538845	1.10863	3.24153	0.00128508	0.00659855	-2.05066		hsa-miR-574-3p	-0.765213	6.97568	-7.17245	3.42e-12	7.15e-11	16.9447
hsa-miR-338-3p	0.61985	8.41526	3.19511	0.00150487	0.00761905	-2.196		hsa-miR-511-3p	-0.608286	0.79569	-7.09038	5.82e-12	1.18e-10	16.4253
hsa-miR-216a-3p	0.901828	1.49997	3.1941	0.00150998	0.00762715	-2.19912		hsa-miR-376b-5p	-0.784113	0.70123	-7.04316	7.88e-12	1.59e-10	16.1286
hsa-miR-552-5p	1.12582	1.86904	3.14764	0.00176511	0.00881338	-2.34254		hsa-miR-133b	-0.524216	0.414936	-6.96895	1.27e-11	2.5e-10	15.6654
hsa-miR-520a-3p	0.966905	1.0295	2.98553	0.00299895	0.0143791	-2.82718		hsa-miR-134-3p	-0.730413	0.652935	-6.87778	2.25e-11	4.41e-10	15.1016
hsa-miR-196b-5p	1.04303	4.39403	2.96413	0.00321087	0.0152939	-2.88933		hsa-miR-26a-1-3p	-0.565159	1.00925	-6.84721	2.73e-11	5.3e-10	14.9139
hsa-miR-512-3p	0.923554	0.974953	2.91826	0.00371195	0.0173758	-3.0211		hsa-miR-145-3p	-1.09671	4.45986	-6.78248	4.1e-11	7.87e-10	14.5187
hsa-miR-552-3p	0.879899	1.42227	2.7804	0.00567705	0.0251644	-3.40522		hsa-miR-758-5p	-1.51074	2.5338	-6.76656	4.52e-11	8.62e-10	14.4219
hsa-miR-519a-5p	0.865449	1.00538	2.71461	0.006913	0.029674	-3.58223		hsa-let-7b-5p	-0.984366	12.6837	-6.75945	4.73e-11	8.77e-10	14.3788
hsa-miR-3923	0.647322	0.674603	2.70576	0.0070966	0.0302232	-3.60573		hsa-miR-627-5p	-0.607925	1.27586	-6.75563	4.84e-11	8.89e-10	14.3556
hsa-miR-205-5p	0.640482	0.971403	2.70489	0.00711483	0.0302415	-3.60803		hsa-miR-3614-3p	-0.674283	1.11517	-6.73059	5.65e-11	1.01e-09	14.204
hsa-miR-526b-5p	0.947468	1.26042	2.67976	0.00766153	0.0320016	-3.67432		hsa-miR-376c-5p	-0.784562	0.732123	-6.70912	6.46e-11	1.15e-09	14.0743
hsa-miR-520f-3p	0.663482	0.609263	2.66037	0.00810901	0.0334843	-3.72508		hsa-miR-199a-5p	-1.96297	8.30717	-6.70738	6.53e-11	1.15e-09	14.0639
hsa-miR-520g-3p	0.643544	0.618127	2.60609	0.00948879	0.0382368	-3.86525		hsa-miR-1271-5p	-0.613645	1.39222	-6.67039	8.2e-11	1.42e-09	13.8413
hsa-miR-518b	0.728971	0.832948	2.56234	0.01075	0.0422988	-3.97619		hsa-miR-152-3p	-0.992764	8.20484	-6.59972	1.26e-10	2.13e-09	13.4189
hsa-miR-520c-3p	0.557217	0.502701	2.55153	0.0110837	0.0432206	-4.00331		hsa-miR-150-3p	-0.768997	1.03694	-6.56206	1.59e-10	2.6e-09	13.1953
hsa-miR-520b-3p	0.556239	0.501836	2.54828	0.0111861	0.0434725	-4.01146		hsa-miR-376c-3p	-1.41073	2.47118	-6.52412	2e-10	3.24e-09	12.9711
hsa-miR-517-5p	0.627719	0.63655	2.54352	0.011337	0.0438929	-4.02334		hsa-miR-144-5p	-1.51768	6.79933	-6.45592	3.02e-10	4.85e-09	12.5707
hsa-miR-516a-5p	0.715238	0.921645	2.52907	0.0118071	0.0455505	-4.05933		hsa-miR-556-5p	-0.564344	0.792417	-6.36503	5.19e-10	8.23e-09	12.0425
hsa-miR-520h	0.535276	0.497554	2.49265	0.0130695	0.0497237	-4.14915		hsa-miR-195-3p	-0.832334	2.03284	-6.34371	5.89e-10	9.2e-09	11.9195
hsa-miR-516b-5p	0.640583	0.692951	2.49069	0.0131409	0.0498987	-4.15396		hsa-miR-654-3p	-1.64091	4.32812	-6.34182	5.95e-10	9.24e-09	11.9086
								hsa-miR-3687	-0.660127	0.699066	-6.31026	7.17e-10	1.1e-08	11.7271
								hsa-miR-30e-5p	-0.617773	13.1634	-6.27012	9.08e-10	1.38e-08	11.4974
								hsa-miR-1295b-5p	-1.34107	3.36007	-6.26784	9.21e-10	1.39e-08	11.4844
								hsa-miR-378a-3p	-1.18347	9.46757	-6.25363	1e-09	1.49e-08	11.4034
								hsa-miR-191-3p	-0.63905	1.19619	-6.23314	1.13e-09	1.66e-08	11.2869
								hsa-miR-379-5p	-1.68841	8.87338	-6.11891	2.19e-09	3.19e-08	10.6431
								hsa-miR-126-3p	-0.683378	12.2141	-6.08575	2.65e-09	3.78e-08	10.458
								hsa-miR-146b-3p	-1.19261	6.9373	-5.99389	4.46e-09	6.25e-08	9.94984
								hsa-miR-153-5p	-0.96943	2.68903	-5.9884	4.6e-09	6.4e-08	9.91964
								hsa-miR-22-3p	-0.613481	17.0344	-5.98756	4.63e-09	6.4e-08	9.91504
								hsa-miR-1468-5p	-1.07593	3.73682	-5.96202	5.34e-09	7.25e-08	9.77504
								hsa-let-7a-2-3p	-0.899413	2.28249	-5.90427	7.39e-09	9.97e-08	9.46029
								hsa-miR-337-3p	-1.46156	4.46783	-5.87975	8.47e-09	1.14e-07	9.3274
								hsa-miR-628-3p	-0.624047	1.37992	-5.82824	1.13e-08	1.49e-07	9.04985
								hsa-miR-6718-5p	-1.072	0.928841	-5.77727	1.49e-08	1.94e-07	8.7772
								hsa-miR-628-5p	-0.663556	3.3284	-5.7523	1.71e-08	2.18e-07	8.6444
								hsa-miR-4524a-3p	-0.587745	0.935985	-5.73613	1.87e-08	2.36e-07	8.55868
								hsa-miR-6761-5p	-0.529782	1.3883	-5.73398	1.89e-08	2.38e-07	8.54729
								hsa-miR-744-3p	-0.78354	3.34301	-5.72096	2.03e-08	2.52e-07	8.4784
								hsa-miR-3130-5p	-1.10749	1.89074	-5.71062	2.15e-08	2.66e-07	8.42382
								hsa-miR-4732-3p	-0.513103	0.465123	-5.69047	2.4e-08	2.93e-07	8.31766
								hsa-let-7e-3p	-0.911061	2.70022	-5.64388	3.09e-08	3.69e-07	8.07343
								hsa-miR-4788	-0.538765	0.517323	-5.5765	4.44e-08	5.21e-07	7.72323
								hsa-miR-1247-5p	-1.46776	1.97941	-5.48097	7.37e-08	8.33e-07	7.23297
								hsa-miR-154-5p	-1.10252	1.89399	-5.42035	1.01e-07	1.13e-06	6.92571
								hsa-miR-4772-3p	-0.812934	2.65669	-5.37644	1.27e-07	1.4e-06	6.70493
								hsa-let-7a-3p	-0.544052	4.55462	-5.37573	1.28e-07	1.4e-06	6.70138
								hsa-miR-6842-3p	-0.514662	1.21067	-5.31804	1.72e-07	1.87e-06	6.41379
								hsa-miR-125a-5p	-0.913092	8.05848	-5.27359	2.16e-07	2.32e-06	6.19402
								hsa-miR-223-3p	-1.00753	6.98634	-5.26139	2.3e-07	2.45e-06	6.13398
								hsa-miR-23a-5p	-0.576427	1.05471	-5.23045	2.69e-07	2.8e-06	5.98225
								hsa-miR-127-5p	-1.29519	6.6222	-5.17013	3.65e-07	3.72e-06	5.68876
								hsa-miR-758-3p	-1.33617	3.24259	-5.16923	3.67e-07	3.72e-06	5.6844
								hsa-miR-874-3p	-0.984739	4.32327	-5.1454	4.13e-07	4.17e-06	5.56926
								hsa-miR-187-3p	-1.11649	1.34632	-5.13431	4.37e-07	4.37e-06	5.51586
								hsa-miR-23b-3p	-0.539928	10.5055	-5.12265	4.63e-07	4.61e-06	5.45983
								hsa-miR-342-5p	-0.633693	2.67308	-5.06135	6.28e-07	6.17e-06	5.16699
								hsa-miR-148a-3p	-0.748549	16.4719	-5.04123	6.93e-07	6.72e-06	5.07157
								hsa-miR-153-3p	-0.527731	0.95478	-4.96526	1.01e-06	9.56e-06	4.71429
								hsa-miR-148a-5p	-0.766876	6.29267	-4.94918	1.09e-06	1.03e-05	4.63927
								hsa-miR-134-5p	-1.38631	7.22875	-4.91144	1.3e-06	1.21e-05	4.46409
								hsa-miR-345-5p	-0.694599	4.1363	-4.84407	1.8e-06	1.64e-05	4.1543
								hsa-miR-483-3p	-2.45292	3.94	-4.75169	2.79e-06	2.46e-05	3.73571
								hsa-miR-299-5p	-0.899628	1.79358	-4.73559	3.01e-06	2.64e-05	3.66353
								hsa-miR-193b-5p	-0.694298	4.0673	-4.70982	3.39e-06	2.95e-05	3.54838
								hsa-miR-223-5p	-0.636842	1.34101	-4.6597	4.28e-06	3.64e-05	3.32609
								hsa-miR-150-5p	-1.10888	8.13829	-4.62394	5.04e-06	4.23e-05	3.16884
								hsa-miR-381-3p	-1.08206	5.14186	-4.61376	5.28e-06	4.4e-05	3.12424
								hsa-miR-122-5p	-1.24213	14.1042	-4.55522	6.89e-06	5.65e-05	2.86963
								hsa-miR-328-3p	-0.536662	4.98382	-4.55462	6.91e-06	5.65e-05	2.86701
								hsa-miR-592	-1.08385	1.73519	-4.53364	7.6e-06	6.18e-05	2.77649
								hsa-miR-136-3p	-1.09759	3.2351	-4.50268	8.74e-06	6.93e-05	2.64361
								hsa-miR-375-3p	-1.87392	10.6687	-4.41203	1.31e-05	0.000101447	2.25924
								hsa-miR-33a-5p	-0.741534	4.86424	-4.40342	1.36e-05	0.000104998	2.22308
								hsa-miR-27a-5p	-0.74548	2.10749	-4.3894	1.44e-05	0.000110886	2.16439
								hsa-miR-483-5p	-2.08182	3.48901	-4.37499	1.54e-05	0.000116885	2.10421
								hsa-miR-127-3p	-1.1136	8.35924	-4.36787	1.59e-05	0.000120165	2.07455
								hsa-miR-505-5p	-0.689008	3.56075	-4.35324	1.69e-05	0.000126768	2.01377
								hsa-miR-194-3p	-0.74613	6.676	-4.31788	1.97e-05	0.000145334	1.86755
								hsa-miR-7-1-3p	-0.523205	3.69078	-4.29009	2.23e-05	0.000163322	1.75345
								hsa-miR-30b-5p	-0.548394	9.24025	-4.25797	2.56e-05	0.000184383	1.62235
								hsa-miR-215-5p	-0.993057	6.68978	-4.23771	2.79e-05	0.000200403	1.54012
								hsa-miR-136-5p	-1.0656	4.19269	-4.16728	3.76e-05	0.000263115	1.25714
								hsa-miR-200b-5p	-0.82241	1.50378	-4.10789	4.81e-05	0.00033624	1.02185
								hsa-miR-376a-5p	-0.656364	1.05278	-4.06302	5.8e-05	0.000400988	0.846201
								hsa-miR-7702	-0.599214	1.08683	-3.98556	7.96e-05	0.000535028	0.547125
								hsa-miR-22-5p	-0.57277	4.55792	-3.97651	8.25e-05	0.000549904	0.512526
								hsa-miR-200a-3p	-1.29619	4.49301	-3.93198	9.88e-05	0.000648022	0.343369
								hsa-miR-203a-3p	-1.32851	8.98451	-3.85941	0.000131821	0.000842101	0.0714632
								hsa-miR-377-5p	-0.648248	1.24714	-3.78752	0.000174711	0.0010842	-0.193237
								hsa-miR-429	-1.13938	3.29038	-3.7754	0.000183127	0.00112997	-0.237395
								hsa-miR-181b-3p	-0.514689	2.74808	-3.76362	0.000191675	0.00117937	-0.280201
								hsa-miR-192-3p	-0.619139	6.54128	-3.7441	0.000206668	0.00126446	-0.350834
								hsa-miR-3065-3p	-0.921859	4.84624	-3.72165	0.000225287	0.00136682	-0.431688
								hsa-miR-30a-5p	-0.603285	13.8611	-3.68595	0.000258167	0.00155761	-0.559268
								hsa-miR-494-3p	-0.678001	1.24094	-3.67692	0.000267176	0.00160749	-0.59137
								hsa-miR-100-5p	-0.782487	12.2709	-3.63779	0.000309735	0.0018381	-0.729603
								hsa-miR-4662a-5p	-0.653004	5.6133	-3.57704	0.00038861	0.0022751	-0.941432
								hsa-miR-411-3p	-0.673127	1.29957	-3.57511	0.000391403	0.00227916	-0.948111
								hsa-miR-370-5p	-0.69046	1.85163	-3.53095	0.000460624	0.00263283	-1.0999
								hsa-miR-143-3p	-0.623458	15.215	-3.49524	0.000524819	0.0029608	-1.22135
								hsa-miR-200b-3p	-1.15352	5.64376	-3.38617	0.000776516	0.00425907	-1.58512
								hsa-miR-370-3p	-0.754467	2.51961	-3.38173	0.000788838	0.00429655	-1.59971
								hsa-miR-146a-5p	-0.716863	5.92029	-3.2968	0.00106232	0.00562768	-1.87504
								hsa-miR-885-5p	-0.921292	7.9792	-3.27881	0.00113056	0.00591704	-1.93252
								hsa-miR-21-3p	-0.537332	10.2944	-3.25412	0.00123083	0.00635004	-2.01091
								hsa-miR-323a-3p	-0.811496	1.93883	-3.1871	0.00154611	0.00777348	-2.22086
								hsa-miR-3065-5p	-0.567698	1.53857	-3.08011	0.00220732	0.0107737	-2.54741
								hsa-miR-200a-5p	-1.02782	5.05701	-3.04396	0.00248387	0.0120155	-2.65531
								hsa-miR-582-5p	-0.556698	3.33734	-3.01115	0.00276211	0.0133022	-2.75221
								hsa-miR-192-5p	-0.505052	15.1684	-2.89342	0.00401214	0.0185807	-3.09163
								hsa-miR-582-3p	-0.629813	7.28696	-2.88936	0.00406319	0.0186975	-3.10308
								hsa-miR-487b-3p	-0.701302	2.51626	-2.8825	0.00415094	0.0190207	-3.12244
								hsa-miR-495-3p	-0.611266	2.92624	-2.74181	0.00637524	0.027694	-3.50954
								hsa-miR-1287-5p	-0.51532	3.85468	-2.6318	0.0088109	0.035889	-3.7992

## Sheet: Table S3
72 upstream miRNAs of ORAOV1 using starBase database
hsa-miR-29a-3p
hsa-miR-33a-5p
hsa-miR-96-5p
hsa-miR-99a-5p
hsa-miR-100-5p
hsa-miR-29b-3p
hsa-miR-182-5p
hsa-miR-204-5p
hsa-miR-205-5p
hsa-miR-210-3p
hsa-miR-211-5p
hsa-miR-218-5p
hsa-miR-221-3p
hsa-miR-222-3p
hsa-miR-124-3p
hsa-miR-125b-5p
hsa-miR-143-3p
hsa-miR-125a-5p
hsa-miR-150-5p
hsa-miR-185-5p
hsa-miR-186-5p
hsa-miR-188-5p
hsa-miR-29c-3p
hsa-miR-99b-5p
hsa-miR-363-3p
hsa-miR-369-3p
hsa-miR-377-3p
hsa-miR-328-3p
hsa-miR-331-3p
hsa-miR-338-3p
hsa-miR-329-3p
hsa-miR-485-5p
hsa-miR-491-5p
hsa-miR-494-3p
hsa-miR-525-5p
hsa-miR-520d-5p
hsa-miR-506-3p
hsa-miR-299-5p
hsa-miR-92b-3p
hsa-miR-556-5p
hsa-miR-582-5p
hsa-miR-33b-5p
hsa-miR-642a-5p
hsa-miR-650
hsa-miR-655-3p
hsa-miR-660-5p
hsa-miR-362-3p
hsa-miR-340-5p
hsa-miR-423-5p
hsa-miR-532-3p
hsa-miR-147b
hsa-miR-1224-5p
hsa-miR-1323
hsa-miR-1271-5p
hsa-miR-1298-5p
hsa-miR-1286
hsa-miR-1294
hsa-miR-1295a
hsa-miR-1247-5p
hsa-miR-548o-3p
hsa-miR-1270
hsa-miR-2114-3p
hsa-miR-3194-5p
hsa-miR-2355-5p
hsa-miR-3622a-5p
hsa-miR-3150b-3p
hsa-miR-374c-5p
hsa-miR-3194-3p
hsa-miR-3064-5p
hsa-miR-4739
hsa-miR-5194
hsa-miR-6504-5p

## Sheet:  Table S4
down_DEGs_miRNA AND upstream miRNAs related ORAOV1
miRNA	Pearson’s r value	p value
hsa-miR-33b-5p	-0.025	0.63
hsa-miR-29c-3p	-0.122	0.0193
hsa-miR-125b-5p	-0.1	0.0556
hsa-miR-99a-5p	-0.092	0.078
hsa-miR-29a-3p	-0.077	0.138
hsa-miR-1271-5p	0.06	0.252
hsa-miR-556-5p	-0.064	0.218
hsa-miR-1247-5p	-0.011	0.839
hsa-miR-125a-5p	0.118	0.0228
hsa-miR-299-5p	-0.005	0.926
hsa-miR-150-5p	0.091	0.0808
hsa-miR-328-3p	-0.034	0.516
hsa-miR-33a-5p	0.065	0.209
hsa-miR-494-3p	0.063	0.224
hsa-miR-100-5p	-0.127	0.0147
hsa-miR-143-3p	0.047	0.364
hsa-miR-582-5p	0.029	0.575

## Sheet: Table S5
miRNA	mRNA	Pearson’s r value	p value
hsa-miR-33b-5p	ORAOV1	-0.025	0.63
hsa-miR-125b-5p	ORAOV1	-0.1	0.0556
hsa-miR-99a-5p	ORAOV1	-0.092	0.078
hsa-miR-29a-3p	ORAOV1	-0.077	0.138
hsa-miR-1271-5p	ORAOV1	0.06	0.252
hsa-miR-556-5p	ORAOV1	-0.064	0.218
hsa-miR-1247-5p	ORAOV1	-0.011	0.839
hsa-miR-125a-5p	ORAOV1	0.118	0.0228*
hsa-miR-299-5p	ORAOV1	-0.005	0.926
hsa-miR-150-5p	ORAOV1	0.091	0.0808
hsa-miR-328-3p	ORAOV1	-0.034	0.516
hsa-miR-33a-5p	ORAOV1	0.065	0.209
hsa-miR-494-3p	ORAOV1	0.063	0.224
hsa-miR-143-3p	ORAOV1	0.047	0.364
hsa-miR-582-5p	ORAOV1	0.029	0.575

## Sheet: Table S6
495 upregulated lncRNAs								160 downregulated lncRNAs
ID	logFC	AveExpr	t	P.Value	adj.P.Val	B		ID	logFC	AveExpr	t	P.Value	adj.P.Val	B
SFTA1P	3.2332	2.99193	16.3298	7.91e-47	3.23e-43	95.5824		AC107396.1	-3.56689	0.76834	-23.6327	2.57e-79	4.21e-75	169.292
NFE2L1-DT	2.73374	4.21565	15.8286	1.2e-44	3.92e-41	90.6296		AC245123.1	-2.11102	0.652431	-19.6134	2.22e-61	1.82e-57	128.625
AL391845.2	2.78058	2.73608	15.5935	1.24e-43	3.39e-40	88.3198		AC093725.2	-2.85487	0.821945	-16.7706	9.31e-49	5.08e-45	99.9649
AC132192.2	2.53188	4.4539	15.2081	5.66e-42	1.32e-38	84.5521		PCDH9-AS2	-3.40141	1.11087	-14.6604	1.23e-39	1.82e-36	79.2465
CAPN10-DT	2.71474	5.2798	15.1443	1.06e-41	2.17e-38	83.9316		LINC01612	-4.46863	1.87283	-13.6219	2.75e-35	2.25e-32	69.3647
AC010719.1	3.10244	5.31663	15.0798	2.01e-41	3.65e-38	83.3039		AC092155.1	-2.77549	1.86346	-13.3455	3.77e-34	2.57e-31	66.7796
MIR4435-2HG	2.23256	8.14289	14.6922	8.99e-40	1.47e-36	79.5523		LINC01093	-5.21077	6.40703	-13.2165	1.27e-33	8e-31	65.5813
ZKSCAN2-DT	2.29852	5.25518	14.6089	2.03e-39	2.77e-36	78.7499		AL360013.3	-4.80206	3.26135	-13.1024	3.71e-33	2.25e-30	64.5244
TMED2-DT	1.86484	5.87368	14.4408	1.04e-38	1.31e-35	77.1362		B3GALT5-AS1	-3.16268	1.65017	-12.8394	4.32e-32	2.28e-29	62.1036
AC092119.2	2.54413	3.99529	14.3783	1.91e-38	2.23e-35	76.5373		FENDRR	-3.16737	2.50266	-12.7433	1.05e-31	5.23e-29	61.2249
LINC01089	2.12773	7.26568	14.2964	4.23e-38	4.61e-35	75.7538		AC010547.2	-4.09181	1.93539	-12.6707	2.06e-31	9.93e-29	60.5622
HCG25	2.03213	4.14258	14.2003	1.07e-37	1.09e-34	74.8367		AC016682.1	-3.84862	4.27306	-12.1441	2.56e-29	8.33e-27	55.8106
LINC01311	2.25786	4.36803	14.0905	3.09e-37	2.97e-34	73.7918		AC006960.2	-1.77157	0.479447	-12.1134	3.38e-29	1.06e-26	55.5361
DDX11-AS1	2.67708	3.72849	14.0495	4.58e-37	4.17e-34	73.4024		AC092969.1	-3.93377	2.51832	-12.0638	5.29e-29	1.58e-26	55.0942
AL121906.2	2.54657	3.71	13.5375	6.13e-35	4.77e-32	68.5728		AC090227.3	-2.02151	0.982725	-11.8661	3.14e-28	7.33e-26	53.3401
LINC02875	2.73925	4.05973	13.3867	2.56e-34	1.9e-31	67.164		AC010280.2	-3.18794	3.19821	-11.5239	6.58e-27	1.27e-24	50.3399
SNHG1	1.99355	9.40471	13.347	3.72e-34	2.57e-31	66.7937		AC138356.1	-2.58206	4.06499	-11.4863	9.18e-27	1.75e-24	50.0128
HAGLROS	2.68733	2.54213	13.309	5.32e-34	3.48e-31	66.4402		LINP1	-3.07352	1.36191	-11.1837	1.3e-25	2.15e-23	47.4011
AC068205.2	2.16352	4.89904	12.9071	2.3e-32	1.35e-29	62.7249		AC008556.1	-1.85112	4.2575	-11.1022	2.64e-25	4e-23	46.7045
MIR34AHG	2.29597	6.90492	12.8694	3.27e-32	1.85e-29	62.3789		LINC01818	-3.41655	3.2339	-11.0908	2.91e-25	4.33e-23	46.6073
AL023803.2	2.54282	3.22898	12.853	3.81e-32	2.08e-29	62.2289		LINC02153	-2.20591	0.948266	-11.0098	5.86e-25	8.49e-23	45.9176
ASB16-AS1	1.53555	7.69811	12.7505	9.86e-32	5.04e-29	61.2908		AC108075.1	-1.61533	0.796552	-10.963	8.78e-25	1.23e-22	45.5205
AL353708.3	2.2666	3.00791	12.6507	2.48e-31	1.16e-28	60.3806		AC010280.1	-2.61471	1.90162	-10.908	1.41e-24	1.94e-22	45.0552
AL355488.1	2.27496	6.34765	12.6322	2.94e-31	1.34e-28	60.2123		AC092384.2	-3.44952	3.13219	-10.782	4.14e-24	5.25e-22	43.9938
AC109322.1	2.06166	5.56104	12.5811	4.72e-31	2.09e-28	59.7477		AC004160.1	-3.47901	3.59107	-10.7587	5.05e-24	6.25e-22	43.7983
AL606489.1	2.71665	3.3815	12.4914	1.08e-30	4.63e-28	58.9338		HAND2-AS1	-3.82884	4.35263	-10.6744	1.03e-23	1.22e-21	43.0932
CDKN2B-AS1	2.9674	4.88787	12.483	1.16e-30	4.88e-28	58.858		AF165147.1	-2.29552	2.89623	-10.6371	1.42e-23	1.66e-21	42.7817
AC005332.5	1.97421	6.48918	12.4742	1.26e-30	5.15e-28	58.7787		AP000439.2	-2.08051	1.28152	-10.6337	1.46e-23	1.67e-21	42.7535
LENG8-AS1	1.94267	5.33205	12.4472	1.61e-30	6.44e-28	58.5345		AL355612.1	-1.71142	0.862526	-10.6095	1.79e-23	2.01e-21	42.5521
AC107375.1	1.79628	5.78847	12.4417	1.7e-30	6.61e-28	58.485		AP000696.2	-1.53973	0.508183	-10.4788	5.38e-23	5.83e-21	41.4687
AL162431.1	2.20886	3.86558	12.4389	1.74e-30	6.63e-28	58.4594		AC104809.1	-4.73624	3.73323	-10.4095	9.61e-23	9.95e-21	40.8972
AC024361.1	2.16962	3.57221	12.3492	3.96e-30	1.47e-27	57.6504		HHIP-AS1	-2.79559	2.7833	-10.3633	1.41e-22	1.41e-20	40.5179
AC018809.1	2.12795	2.69251	12.3251	4.93e-30	1.79e-27	57.433		AC011139.1	-2.24447	0.83747	-10.2768	2.9e-22	2.78e-20	39.8097
DLG5-AS1	2.24275	4.60384	12.3095	5.68e-30	2.02e-27	57.2933		AC004160.2	-2.27713	1.52546	-10.2488	3.66e-22	3.42e-20	39.581
AL137060.3	2.18246	2.78516	12.2179	1.31e-29	4.56e-27	56.4711		AC099508.2	-2.98675	2.87914	-10.0867	1.39e-21	1.21e-19	38.266
RUSC1-AS1	2.27535	6.85591	12.1869	1.73e-29	5.79e-27	56.1934		KBTBD11-OT1	-1.54394	0.965951	-10.0838	1.43e-21	1.22e-19	38.2425
GAS5	1.97692	11.6939	12.1424	2.6e-29	8.33e-27	55.7954		AC026369.3	-2.03411	1.64534	-10.0822	1.45e-21	1.23e-19	38.2296
BACE1-AS	1.67485	6.22187	12.0632	5.32e-29	1.58e-26	55.0888		LINC02027	-4.53672	4.27704	-10.0476	1.92e-21	1.61e-19	37.9504
SNHG4	2.71939	6.17874	12.052	5.89e-29	1.72e-26	54.989		HAO2-IT1	-2.16435	1.66801	-9.81795	1.24e-20	9.42e-19	36.1137
SAP30L-AS1	1.55909	4.67391	12.0333	6.97e-29	2e-26	54.8228		NCOA7-AS1	-1.90954	1.26166	-9.81101	1.32e-20	9.87e-19	36.0587
AC092171.4	2.11778	2.86762	12.0307	7.13e-29	2.01e-26	54.7997		LINC02160	-2.79124	1.62488	-9.55109	1.05e-19	6.71e-18	34.0129
AL451050.2	1.98775	2.86462	12.0058	8.93e-29	2.48e-26	54.5782		LINC01863	-2.02223	1.41996	-9.54613	1.1e-19	6.93e-18	33.9742
AL136162.1	2.13093	3.60495	11.9981	9.57e-29	2.61e-26	54.5095		ERVE-1	-2.21887	1.09398	-9.53353	1.21e-19	7.62e-18	33.876
SUGT1-DT	1.90881	3.84166	11.987	1.06e-28	2.79e-26	54.4115		AC004540.2	-2.68446	3.29146	-9.5141	1.41e-19	8.76e-18	33.7246
HAGLR	4.45096	5.47291	11.971	1.22e-28	3.17e-26	54.2694		LINC02275	-2.77293	2.27146	-9.45691	2.22e-19	1.33e-17	33.2803
MYLK-AS1	1.64232	4.55166	11.9438	1.56e-28	3.99e-26	54.028		AL138749.1	-2.02988	0.823225	-9.40519	3.34e-19	1.93e-17	32.88
AC105137.2	1.94931	2.6801	11.9284	1.79e-28	4.51e-26	53.8912		AC026461.2	-1.88402	0.940414	-9.40485	3.35e-19	1.93e-17	32.8774
AC092910.3	1.85861	5.0171	11.9197	1.94e-28	4.81e-26	53.8142		AC087392.1	-3.1885	3.26391	-9.29752	7.76e-19	4.3e-17	32.0512
AL731569.1	1.7502	4.6967	11.9147	2.03e-28	4.95e-26	53.7704		PCA3	-1.58358	0.890655	-9.28103	8.82e-19	4.81e-17	31.9248
LINC01004	1.82261	5.46574	11.9042	2.23e-28	5.36e-26	53.6774		AL021328.1	-3.53759	3.18382	-9.27809	9.03e-19	4.9e-17	31.9023
AC102953.2	2.2981	5.49294	11.8694	3.04e-28	7.22e-26	53.3694		WARS2-IT1	-1.68361	1.54413	-9.08715	3.96e-18	1.95e-16	30.4502
CYTOR	2.32448	7.81121	11.8225	4.63e-28	1.07e-25	52.956		AC019257.1	-2.49538	2.41296	-8.77595	4.22e-17	1.81e-15	28.1272
ZNF252P-AS1	2.17014	3.39673	11.7618	7.97e-28	1.76e-25	52.4213		LINC00885	-3.15073	3.41461	-8.65694	1.03e-16	4.19e-15	27.2535
AL133367.1	2.20968	4.61924	11.628	2.62e-27	5.57e-25	51.2474		LINC01620	-2.03848	3.09077	-8.6238	1.32e-16	5.25e-15	27.0117
SNHG12	1.72787	7.40768	11.6031	3.27e-27	6.86e-25	51.0298		AP000547.3	-1.63812	1.51701	-8.56334	2.06e-16	7.95e-15	26.5722
AL358777.3	2.19111	2.84939	11.5795	4.03e-27	8.24e-25	50.8238		AL357033.2	-1.73685	1.0763	-8.48204	3.75e-16	1.38e-14	25.9847
AL445524.1	2.04412	6.23291	11.5586	4.85e-27	9.79e-25	50.6416		LY6E-DT	-2.6555	3.78846	-8.47421	3.97e-16	1.45e-14	25.9283
AL513320.1	2.01556	2.76879	11.5457	5.43e-27	1.08e-24	50.5292		AL161668.4	-2.33053	5.06504	-8.46558	4.23e-16	1.54e-14	25.8662
SATB2-AS1	2.57578	5.57892	11.5446	5.49e-27	1.08e-24	50.5197		AL161645.2	-2.65746	2.37732	-8.38587	7.58e-16	2.66e-14	25.2948
AC022210.1	1.88677	3.818	11.5429	5.57e-27	1.09e-24	50.5047		AL161430.1	-1.5608	1.97306	-8.22594	2.41e-15	7.9e-14	24.16
LINC02202	2.04305	2.57608	11.4627	1.13e-26	2.13e-24	49.8075		FAM99A	-3.98368	6.95315	-8.22449	2.44e-15	7.97e-14	24.1498
AC016773.1	2.12814	2.93934	11.4589	1.17e-26	2.17e-24	49.7748		AC096577.1	-1.52839	0.570881	-8.20173	2.87e-15	9.2e-14	23.9896
AC011921.1	2.03316	2.64023	11.4289	1.52e-26	2.8e-24	49.514		AC106822.1	-1.94179	2.23181	-8.07612	7.04e-15	2.15e-13	23.1113
SNHG20	1.55807	7.05155	11.39	2.14e-26	3.9e-24	49.1772		AL161740.1	-1.67893	3.30924	-8.04834	8.58e-15	2.58e-13	22.9183
MAFG-DT	2.62921	5.87529	11.3403	3.31e-26	5.89e-24	48.7481		AC129507.1	-1.55681	3.0759	-8.02803	9.91e-15	2.93e-13	22.7776
AC239799.2	2.5385	3.09206	11.3027	4.6e-26	8.1e-24	48.4239		FAM99B	-3.10437	4.83051	-7.95491	1.66e-14	4.73e-13	22.2732
GIHCG	1.87167	6.32948	11.2978	4.81e-26	8.36e-24	48.3817		LINC02593	-2.46038	3.4854	-7.94903	1.73e-14	4.91e-13	22.2327
AP003352.1	1.6563	4.8492	11.2261	8.99e-26	1.55e-23	47.7651		LINC02268	-1.75182	1.67962	-7.93589	1.9e-14	5.33e-13	22.1425
LINC00685	1.77532	2.66703	11.2237	9.18e-26	1.56e-23	47.744		AP006285.1	-2.10773	2.33624	-7.92009	2.12e-14	5.88e-13	22.0341
LINC00853	2.48075	5.14512	11.2215	9.35e-26	1.58e-23	47.7256		LINC02671	-1.74298	1.76994	-7.91715	2.16e-14	5.99e-13	22.014
LINC01704	1.75851	1.83454	11.2159	9.82e-26	1.64e-23	47.6775		LINC01625	-2.65831	3.36398	-7.91535	2.19e-14	6.05e-13	22.0016
SNHG7	1.77434	9.44009	11.1615	1.58e-25	2.58e-23	47.211		AC079061.1	-2.54043	4.0037	-7.89512	2.52e-14	6.93e-13	21.8631
RAD51-AS1	1.57351	6.75306	11.1586	1.62e-25	2.62e-23	47.1868		PWRN1	-1.66317	1.37606	-7.89095	2.6e-14	7.13e-13	21.8346
AC048341.2	1.89523	4.06915	11.1535	1.69e-25	2.71e-23	47.1424		AC026469.1	-1.93865	2.40601	-7.85733	3.28e-14	8.87e-13	21.6052
RGS5	1.76767	4.80427	11.1318	2.04e-25	3.18e-23	46.9571		MAGI2-AS3	-2.4002	7.71149	-7.78577	5.39e-14	1.41e-12	21.1193
AC022007.1	1.88409	5.78122	11.1182	2.3e-25	3.55e-23	46.8407		LINC02840	-2.63465	2.09395	-7.7707	5.98e-14	1.56e-12	21.0173
AC232271.1	1.83605	4.93984	11.104	2.6e-25	3.97e-23	46.7197		LINC01488	-3.19384	3.73583	-7.73093	7.87e-14	2.02e-12	20.7491
AC010864.1	1.7312	3.25872	11.0393	4.54e-25	6.64e-23	46.1688		AC007221.1	-2.29357	3.18278	-7.72925	7.96e-14	2.04e-12	20.7378
AC110285.2	2.48574	5.84095	11.0081	5.95e-25	8.54e-23	45.9034		LINC02388	-2.23461	2.81522	-7.72064	8.45e-14	2.15e-12	20.6799
Z83745.1	1.64081	4.54975	10.9964	6.58e-25	9.37e-23	45.8037		LINC02428	-3.08322	6.39025	-7.71649	8.69e-14	2.21e-12	20.6519
AL117379.1	1.73371	3.78527	10.9829	7.4e-25	1.04e-22	45.6891		AC020978.4	-2.15055	4.98831	-7.70265	9.56e-14	2.43e-12	20.559
U73166.1	2.1368	3.87349	10.9244	1.22e-24	1.7e-22	45.1935		LINC00907	-2.01133	2.62728	-7.64261	1.44e-13	3.58e-12	20.1571
CCDC18-AS1	1.70985	7.33291	10.8718	1.92e-24	2.62e-22	44.7497		AL139385.1	-2.11152	4.43338	-7.62967	1.58e-13	3.87e-12	20.0708
AC069544.1	1.56355	4.41635	10.8676	1.99e-24	2.69e-22	44.7145		AC063938.1	-1.82161	2.85057	-7.61891	1.69e-13	4.14e-12	19.9992
AC139100.2	2.13376	4.18787	10.8617	2.09e-24	2.81e-22	44.6645		LINC01767	-1.85511	7.36525	-7.53104	3.08e-13	7.29e-12	19.4166
AL137077.2	2.11077	4.19394	10.8511	2.29e-24	3.05e-22	44.5749		AL078590.2	-1.69778	3.98892	-7.52899	3.12e-13	7.37e-12	19.4031
AL731563.3	1.5071	4.27152	10.82	2.99e-24	3.92e-22	44.3128		LINC01727	-2.31138	2.01743	-7.5241	3.22e-13	7.61e-12	19.3708
AC091057.1	2.4319	5.12214	10.8182	3.04e-24	3.95e-22	44.2977		AC090796.1	-2.69225	2.54785	-7.44605	5.45e-13	1.22e-11	18.8581
AC005332.1	1.64014	2.46081	10.8102	3.25e-24	4.19e-22	44.2308		AC005538.3	-1.90463	2.22544	-7.40627	7.11e-13	1.57e-11	18.5984
TMPO-AS1	1.83242	6.7988	10.7718	4.51e-24	5.68e-22	43.9084		LINC00598	-1.89367	4.65653	-7.40282	7.27e-13	1.6e-11	18.5759
AC083855.2	2.29046	4.29144	10.766	4.74e-24	5.92e-22	43.8593		AC012409.1	-1.82971	4.27134	-7.3658	9.3e-13	2.02e-11	18.3353
AC099778.1	1.51858	4.21731	10.7323	6.32e-24	7.77e-22	43.5767		AC112206.2	-2.89847	6.074	-7.35854	9.76e-13	2.11e-11	18.2882
PTGES2-AS1	2.29027	2.49156	10.7242	6.76e-24	8.26e-22	43.5096		AC034139.1	-1.99457	4.25929	-7.3425	1.09e-12	2.34e-11	18.1842
AC010201.2	2.05631	3.60697	10.7033	8.08e-24	9.79e-22	43.3346		AC040168.1	-2.15976	2.71492	-7.24928	2.01e-12	4.14e-11	17.5838
ASMTL-AS1	1.84965	5.26339	10.6884	9.17e-24	1.1e-21	43.2101		AC007344.1	-2.62963	5.17011	-7.22171	2.41e-12	4.91e-11	17.4074
AC079174.2	1.88097	4.08969	10.6412	1.37e-23	1.61e-21	42.8163		LINC00844	-3.33602	6.76431	-7.18809	3e-12	6.06e-11	17.1929
TDRKH-AS1	1.81411	3.17151	10.6359	1.43e-23	1.66e-21	42.7717		AC008549.1	-2.8722	7.38807	-7.13633	4.2e-12	8.31e-11	16.8643
TMCO1-AS1	1.9212	3.42049	10.6341	1.45e-23	1.67e-21	42.7568		LINC02691	-1.74513	2.13158	-7.09747	5.4e-12	1.05e-10	16.6189
RNF139-AS1	1.68241	5.24235	10.6206	1.63e-23	1.85e-21	42.6443		AL589669.1	-2.25981	2.0128	-7.00649	9.69e-12	1.8e-10	16.0482
AL158212.3	1.87214	5.62149	10.5788	2.32e-23	2.58e-21	42.2969		AL390755.1	-2.78001	3.22947	-6.90062	1.9e-11	3.37e-10	15.3915
SCAT2	2.08569	3.35295	10.5617	2.68e-23	2.96e-21	42.1548		AC025062.3	-2.10622	2.57633	-6.88861	2.05e-11	3.62e-10	15.3175
AC008870.2	1.59422	3.51054	10.5492	2.98e-23	3.27e-21	42.0509		LINC01831	-2.7708	4.60836	-6.65757	8.67e-11	1.38e-09	13.9142
LINC01138	2.15963	7.1371	10.4857	5.08e-23	5.54e-21	41.5258		AP006216.2	-1.86945	3.77427	-6.64474	9.38e-11	1.49e-09	13.8374
LINC02585	1.87437	2.6266	10.4409	7.39e-23	7.9e-21	41.1559		AL390778.2	-1.50109	0.770914	-6.61178	1.15e-10	1.79e-09	13.6407
AC132872.2	1.90627	2.44269	10.4342	7.82e-23	8.31e-21	41.1004		LINC01702	-2.51545	6.64165	-6.57695	1.42e-10	2.17e-09	13.4336
LINC02245	1.5275	6.17737	10.4192	8.87e-23	9.28e-21	40.9768		AC007319.1	-1.53883	5.56506	-6.545	1.73e-10	2.6e-09	13.2445
AC138696.2	1.63811	4.22537	10.4087	9.67e-23	9.95e-21	40.891		LINC02754	-2.46638	6.65638	-6.53216	1.87e-10	2.8e-09	13.1687
LINC00893	1.81054	3.42464	10.4075	9.77e-23	9.99e-21	40.8811		LINC01714	-1.66446	3.15709	-6.50143	2.25e-10	3.35e-09	12.9877
AP001469.3	2.07526	4.64041	10.4053	9.95e-23	1.01e-20	40.8631		AL035661.1	-2.53128	5.57053	-6.45979	2.89e-10	4.24e-09	12.7437
PRKAR2A-AS1	1.81991	5.55709	10.3848	1.18e-22	1.19e-20	40.6946		LINC01018	-3.37802	8.90748	-6.45346	3e-10	4.39e-09	12.7067
AL390957.1	3.08934	4.27475	10.3626	1.42e-22	1.41e-20	40.5119		AL713852.1	-1.83315	2.93897	-6.39337	4.3e-10	6.1e-09	12.3571
STAU2-AS1	1.88966	2.50349	10.3555	1.51e-22	1.49e-20	40.4532		DLGAP1-AS3	-1.55924	1.27511	-6.33309	6.15e-10	8.49e-09	12.0091
LINC00894	1.92555	5.40995	10.3494	1.59e-22	1.55e-20	40.4038		UICLM	-2.14156	3.50935	-6.28584	8.13e-10	1.11e-08	11.7382
STAM-AS1	1.99162	2.65428	10.2894	2.61e-22	2.53e-20	39.9125		DNM3OS	-1.51498	4.28101	-6.27415	8.71e-10	1.18e-08	11.6715
AC004816.1	1.99676	4.6541	10.2853	2.7e-22	2.6e-20	39.8793		AC091729.2	-1.52562	1.09115	-6.262	9.35e-10	1.26e-08	11.6022
AC009148.1	1.72754	2.35216	10.2694	3.09e-22	2.92e-20	39.749		AC119424.1	-1.59946	2.85726	-6.16191	1.68e-09	2.17e-08	11.0357
AC087741.1	1.77295	6.10655	10.2563	3.44e-22	3.24e-20	39.6425		ELAVL4-AS1	-2.10232	2.47593	-6.12195	2.11e-09	2.68e-08	10.8117
AC023908.3	1.97717	2.86313	10.2476	3.7e-22	3.42e-20	39.5716		AC010969.1	-1.86386	2.39157	-6.09389	2.48e-09	3.11e-08	10.6551
LINC01970	1.93434	2.45902	10.2475	3.7e-22	3.42e-20	39.5705		AC129915.3	-1.80071	2.02926	-6.03321	3.51e-09	4.31e-08	10.3185
SNHG25	1.98851	4.68405	10.2161	4.8e-22	4.41e-20	39.3149		AC005304.2	-1.5436	1.61214	-5.98244	4.69e-09	5.67e-08	10.0391
TMEM147-AS1	1.53349	6.31927	10.1806	6.43e-22	5.85e-20	39.0265		LINC01229	-1.52827	4.28987	-5.95615	5.44e-09	6.48e-08	9.89523
AC022306.2	1.56091	4.79283	10.1751	6.74e-22	6.09e-20	38.9813		AC007298.2	-1.51175	2.65209	-5.95157	5.58e-09	6.64e-08	9.8702
AL160006.1	1.59143	6.53615	10.1719	6.92e-22	6.22e-20	38.9553		LINC01979	-1.71461	2.70035	-5.94681	5.73e-09	6.8e-08	9.84421
AC245884.8	1.67306	3.55415	10.1671	7.19e-22	6.43e-20	38.917		AL354872.1	-1.53931	6.85646	-5.90018	7.45e-09	8.68e-08	9.59062
AC004834.1	1.571	2.12846	10.1526	8.11e-22	7.17e-20	38.7994		AGAP1-IT1	-1.57421	4.09895	-5.86711	8.96e-09	1.03e-07	9.41179
LINC00528	1.86234	5.38875	10.1287	9.87e-22	8.68e-20	38.6053		LINC02156	-1.62059	3.03442	-5.86398	9.12e-09	1.05e-07	9.39494
AC024560.4	1.97687	2.74005	10.1156	1.1e-21	9.62e-20	38.4991		AC009093.5	-1.64874	2.81667	-5.82657	1.12e-08	1.27e-07	9.19378
AC124016.1	1.55529	3.0217	10.1145	1.11e-21	9.66e-20	38.4902		AC103740.1	-1.93744	6.34624	-5.81561	1.19e-08	1.35e-07	9.13506
CRNDE	2.99834	6.50685	10.0848	1.42e-21	1.22e-19	38.2505		LINC01370	-3.28807	5.65523	-5.8105	1.23e-08	1.38e-07	9.10768
AC011462.4	1.77789	2.91405	10.053	1.84e-21	1.55e-19	37.9944		LINC01348	-1.99976	8.19315	-5.80885	1.24e-08	1.39e-07	9.09884
AL031432.4	1.62571	3.29432	10.0312	2.2e-21	1.83e-19	37.8185		DIO3OS	-2.36813	4.77577	-5.7892	1.38e-08	1.53e-07	8.99389
AC073896.2	1.51444	3.72779	10.0077	2.66e-21	2.19e-19	37.6294		POU6F2-AS1	-2.18495	2.90127	-5.77468	1.5e-08	1.64e-07	8.91657
AC073352.1	1.63647	1.88012	9.98609	3.18e-21	2.6e-19	37.4561		LINC02037	-1.88192	6.64294	-5.73302	1.88e-08	2.03e-07	8.69548
FLJ31104	1.89855	3.53967	9.93582	4.78e-21	3.89e-19	37.0533		FAM245A	-2.02118	3.13995	-5.62661	3.35e-08	3.44e-07	8.13716
AC010300.1	1.7643	4.01997	9.93286	4.9e-21	3.97e-19	37.0296		AL365259.1	-1.54237	3.39587	-5.59569	3.96e-08	4.02e-07	7.97661
AL022322.1	1.96214	4.28512	9.91965	5.46e-21	4.4e-19	36.9239		LINC01750	-1.75893	3.57188	-5.59379	4e-08	4.06e-07	7.96673
AC005089.1	2.03406	4.66148	9.89606	6.61e-21	5.27e-19	36.7356		LINC02362	-1.62735	7.67923	-5.5699	4.54e-08	4.55e-07	7.84325
AC013731.1	1.82844	3.09192	9.88315	7.34e-21	5.8e-19	36.6325		AC109454.3	-1.79072	3.29216	-5.47216	7.63e-08	7.35e-07	7.34277
AC074212.1	1.75304	4.00983	9.87813	7.64e-21	5.98e-19	36.5926		HNF4A-AS1	-1.90323	7.07251	-5.44686	8.72e-08	8.32e-07	7.21445
Z97832.2	1.80672	3.58865	9.8613	8.76e-21	6.82e-19	36.4585		AC106795.2	-1.63018	3.48398	-5.42564	9.74e-08	9.17e-07	7.10721
AC126118.1	1.69985	2.3357	9.85251	9.4e-21	7.29e-19	36.3885		AL391095.2	-1.53225	6.73693	-5.38524	1.2e-07	1.11e-06	6.90411
AC010973.2	1.85924	2.69058	9.83842	1.05e-20	8.13e-19	36.2764		U91319.1	-2.08588	4.97148	-5.37694	1.26e-07	1.16e-06	6.86254
AC003102.1	1.69146	5.02474	9.82932	1.13e-20	8.71e-19	36.204		AC007391.3	-1.65752	2.42408	-5.18172	3.41e-07	2.86e-06	5.90109
AC103706.1	1.81326	4.73563	9.82613	1.16e-20	8.9e-19	36.1787		AL133419.1	-1.83454	2.39909	-5.1648	3.72e-07	3.1e-06	5.8192
AC096642.1	1.85603	3.39639	9.81863	1.24e-20	9.41e-19	36.1191		AP001042.1	-1.61773	5.84559	-5.13047	4.41e-07	3.64e-06	5.65383
AL121832.3	2.03274	3.34857	9.81339	1.29e-20	9.73e-19	36.0776		AC090340.1	-2.08891	4.61819	-5.0664	6.07e-07	4.9e-06	5.3478
AC012615.1	1.55711	4.48311	9.80198	1.41e-20	1.06e-18	35.987		LINC01554	-2.6411	7.73201	-4.96169	1.01e-06	7.85e-06	4.85501
AC004263.1	1.77429	2.43059	9.7991	1.45e-20	1.08e-18	35.9642		FAM83A-AS1	-2.56065	4.98345	-4.84117	1.81e-06	1.33e-05	4.29915
AC010331.1	1.60946	3.06294	9.79792	1.46e-20	1.08e-18	35.9548		AP000851.2	-1.84609	2.48359	-4.83274	1.89e-06	1.38e-05	4.26072
LINC01703	2.21842	4.78571	9.7949	1.5e-20	1.1e-18	35.9308		UCA1	-1.71539	2.57858	-4.76036	2.66e-06	1.88e-05	3.93327
AL121658.1	1.61796	2.55962	9.78795	1.58e-20	1.15e-18	35.8758		AC011591.1	-1.62679	3.3356	-4.68444	3.79e-06	2.6e-05	3.59456
TMCC1-AS1	1.75674	5.36037	9.78679	1.6e-20	1.16e-18	35.8665		LINC01814	-1.53467	3.26168	-4.55097	6.99e-06	4.58e-05	3.01105
AL031186.1	1.57071	3.03855	9.77561	1.75e-20	1.26e-18	35.778		LINC00659	-1.73419	5.17249	-4.42993	1.2e-05	7.46e-05	2.49509
SNHG22	1.59338	2.89683	9.76831	1.86e-20	1.32e-18	35.7202		LINC02675	-1.51394	4.59037	-4.36561	1.6e-05	9.64e-05	2.2261
AC005393.1	1.70189	2.32427	9.75046	2.14e-20	1.51e-18	35.579		AC007423.1	-2.10499	3.60743	-4.36198	1.62e-05	9.78e-05	2.211
AL024498.1	1.68153	2.32726	9.73077	2.51e-20	1.75e-18	35.4234		AC004862.1	-1.71142	6.68215	-4.33788	1.8e-05	0.000107636	2.11121
AL133410.1	1.90206	3.75767	9.72952	2.53e-20	1.76e-18	35.4135		LINC01320	-1.73845	5.17848	-4.11211	4.71e-05	0.00025522	1.20094
SNHG3	1.77519	8.263	9.72894	2.55e-20	1.76e-18	35.409		H19	-1.83447	10.9041	-3.90286	0.000110593	0.000550176	0.397418
STK24-AS1	1.78494	3.11888	9.71288	2.9e-20	1.99e-18	35.2822		AC084375.1	-1.84506	4.22896	-3.89412	0.000114514	0.000566408	0.364696
AC005041.3	1.78209	4.01113	9.68854	3.52e-20	2.41e-18	35.0904		AP001783.1	-1.8132	5.02423	-3.76225	0.000192152	0.000898429	-0.120586
AL365181.3	3.82875	7.15212	9.67714	3.86e-20	2.6e-18	35.0006
AL357079.1	1.8017	3.7251	9.6709	4.06e-20	2.72e-18	34.9516
RASGRF2-AS1	1.55838	1.69415	9.65265	4.69e-20	3.12e-18	34.8081
AL109615.4	1.81566	5.15655	9.62832	5.7e-20	3.78e-18	34.6171
HOTTIP	3.74559	3.54239	9.61981	6.1e-20	4.02e-18	34.5504
AC016737.1	1.84203	2.7305	9.61695	6.24e-20	4.1e-18	34.5279
LINC01355	1.73171	6.21107	9.60306	6.97e-20	4.53e-18	34.4191
AC017083.1	1.5529	2.15507	9.57283	8.87e-20	5.73e-18	34.1827
FLVCR1-DT	1.97376	6.7597	9.56893	9.15e-20	5.89e-18	34.1521
BX649601.1	1.7127	3.02881	9.56634	9.34e-20	5.99e-18	34.132
MINCR	1.61268	7.1546	9.54899	1.07e-19	6.8e-18	33.9965
C9orf163	1.65306	3.43125	9.50455	1.52e-19	9.41e-18	33.6503
LINC02685	1.86275	1.86649	9.50131	1.56e-19	9.62e-18	33.6251
KDM4A-AS1	1.55074	4.83014	9.49826	1.6e-19	9.82e-18	33.6014
AC009133.1	1.75796	4.16879	9.48382	1.8e-19	1.09e-17	33.4891
LINC00205	1.73107	7.32059	9.48189	1.82e-19	1.1e-17	33.4742
AC106820.3	1.7395	3.52625	9.47668	1.9e-19	1.15e-17	33.4337
MORF4L2-AS1	1.61581	3.16025	9.47168	1.98e-19	1.19e-17	33.3949
AC034229.4	1.72993	2.03917	9.47043	2e-19	1.2e-17	33.3852
AL358072.1	1.50057	2.20214	9.45365	2.28e-19	1.36e-17	33.255
MELTF-AS1	2.11105	4.00507	9.45125	2.32e-19	1.38e-17	33.2364
AC112484.3	2.00221	3.94751	9.40913	3.24e-19	1.88e-17	32.9105
AC233280.1	1.73074	2.24482	9.40723	3.28e-19	1.91e-17	32.8957
AC025171.2	1.77428	5.69953	9.39267	3.68e-19	2.11e-17	32.7833
AP006623.1	1.72023	4.18914	9.39153	3.72e-19	2.12e-17	32.7745
FOXD2-AS1	2.08979	6.66388	9.38875	3.8e-19	2.16e-17	32.753
LEF1-AS1	2.05857	2.04752	9.35323	5.02e-19	2.83e-17	32.4793
AC011445.1	1.93553	3.42445	9.35178	5.08e-19	2.85e-17	32.4681
IBA57-DT	1.53655	2.02029	9.3291	6.06e-19	3.39e-17	32.2937
LINC01235	2.53298	3.22895	9.28147	8.79e-19	4.81e-17	31.9283
PVT1	2.07441	6.9589	9.27796	9.04e-19	4.9e-17	31.9014
AF235103.3	1.56394	4.1612	9.25866	1.05e-18	5.67e-17	31.7536
AC025171.5	1.54488	2.72491	9.25228	1.1e-18	5.94e-17	31.7048
RPL37A-DT	1.51666	4.30496	9.23735	1.24e-18	6.65e-17	31.5908
AL021707.2	1.70438	4.12804	9.2344	1.27e-18	6.78e-17	31.5683
AC116025.2	1.89299	2.08486	9.23024	1.31e-18	6.96e-17	31.5366
ELF3-AS1	1.6775	7.27613	9.22536	1.36e-18	7.21e-17	31.4993
AC107959.4	2.44753	2.86339	9.22391	1.38e-18	7.26e-17	31.4883
AL359878.1	1.86012	2.54724	9.21967	1.42e-18	7.48e-17	31.4559
AC027796.4	1.84964	3.63465	9.21119	1.52e-18	7.97e-17	31.3913
LINC00653	1.67255	3.64532	9.2087	1.55e-18	8.1e-17	31.3723
AC023355.1	1.79038	2.24537	9.20801	1.56e-18	8.11e-17	31.367
AC008610.1	1.65809	3.57219	9.19881	1.67e-18	8.66e-17	31.2969
AL117344.2	1.69276	2.54256	9.18113	1.92e-18	9.84e-17	31.1624
HCG27	1.56561	4.98991	9.16647	2.15e-18	1.09e-16	31.051
AC141002.1	1.53077	1.93823	9.15339	2.38e-18	1.2e-16	30.9517
LINC00628	1.79258	2.07782	9.09341	3.77e-18	1.87e-16	30.4975
AL133215.2	1.82681	2.31773	9.08314	4.09e-18	2.01e-16	30.4199
AC245060.6	2.05764	4.20403	9.07802	4.25e-18	2.08e-16	30.3812
AL035461.2	1.78767	3.76368	9.0593	4.91e-18	2.38e-16	30.2401
AL590666.2	2.95464	4.49193	9.05793	4.96e-18	2.39e-16	30.2298
AC145343.1	1.83539	3.94962	9.04433	5.5e-18	2.65e-16	30.1273
AC067930.9	1.64113	4.39316	9.03856	5.75e-18	2.76e-16	30.0839
AC011005.4	2.00451	2.59075	9.02749	6.26e-18	3e-16	30.0006
LINC02475	3.13993	2.94136	9.01492	6.89e-18	3.28e-16	29.9061
LINC02615	1.59917	5.56929	9.01462	6.91e-18	3.28e-16	29.9039
LINC01226	2.36502	4.22786	9.00236	7.59e-18	3.59e-16	29.8118
AC092535.5	2.03494	5.97074	8.97889	9.08e-18	4.26e-16	29.6359
AC011294.1	2.95277	3.68976	8.95211	1.11e-17	5.15e-16	29.4354
AC006252.1	1.66018	2.56411	8.95198	1.11e-17	5.15e-16	29.4344
AL136419.3	1.78017	2.96342	8.90842	1.55e-17	7.1e-16	29.1093
AP006621.2	2.0853	3.58136	8.87438	2.01e-17	9.06e-16	28.8559
ZNNT1	1.57448	7.14692	8.86812	2.11e-17	9.47e-16	28.8095
LINC01116	2.4128	3.54115	8.85535	2.32e-17	1.03e-15	28.7146
AC080129.2	1.841	3.21943	8.81414	3.17e-17	1.4e-15	28.4093
LINC01943	1.89066	3.73851	8.81222	3.21e-17	1.41e-15	28.395
TM4SF19-AS1	1.64771	2.43684	8.81038	3.26e-17	1.43e-15	28.3815
AL080317.2	1.54823	4.86185	8.80672	3.35e-17	1.46e-15	28.3544
AC006538.1	1.89006	3.20537	8.79673	3.61e-17	1.56e-15	28.2806
AC026740.1	2.0831	4.39701	8.79204	3.74e-17	1.61e-15	28.2459
AC008875.1	1.56099	1.84185	8.7728	4.32e-17	1.84e-15	28.104
PRR7-AS1	1.79355	2.28512	8.72854	6.03e-17	2.54e-15	27.7782
SNHG32	1.56647	8.22494	8.71683	6.58e-17	2.75e-15	27.6922
AC100803.4	1.79266	2.36025	8.71276	6.78e-17	2.82e-15	27.6622
AC002128.1	1.54764	3.31643	8.69935	7.5e-17	3.11e-15	27.5639
PITPNA-AS1	1.55095	3.34773	8.69422	7.79e-17	3.23e-15	27.5263
H2AZ1-DT	1.55098	2.31737	8.68197	8.54e-17	3.5e-15	27.4365
AL592424.1	1.84985	4.2547	8.65937	1.01e-16	4.12e-15	27.2712
LINC01186	2.42144	3.75064	8.64111	1.16e-16	4.68e-15	27.1379
DCST1-AS1	1.54671	5.42223	8.60919	1.47e-16	5.81e-15	26.9053
AC114316.1	2.54627	2.7294	8.6021	1.55e-16	6.11e-15	26.8537
AC112484.1	1.84724	4.02098	8.59869	1.59e-16	6.25e-15	26.8289
AC012313.8	1.55026	3.20054	8.59517	1.63e-16	6.4e-15	26.8033
LINC00482	1.79003	6.85065	8.58882	1.71e-16	6.68e-15	26.7571
ZNF232-AS1	1.57306	5.50685	8.5853	1.75e-16	6.84e-15	26.7316
LINC01409	1.50871	3.72342	8.57599	1.88e-16	7.31e-15	26.664
PRC1-AS1	1.54525	2.20751	8.57097	1.95e-16	7.54e-15	26.6275
MIR9-1HG	2.11107	4.69908	8.55549	2.18e-16	8.39e-15	26.5153
AC087175.1	1.7707	2.8105	8.5461	2.34e-16	8.97e-15	26.4473
AL355388.1	1.98911	2.60681	8.52643	2.71e-16	1.03e-14	26.305
AC104590.1	1.50388	1.78163	8.52578	2.72e-16	1.03e-14	26.3003
MIR194-2HG	1.58168	5.66022	8.5255	2.73e-16	1.03e-14	26.2982
AL445228.2	1.8082	1.98095	8.52193	2.8e-16	1.05e-14	26.2725
AL365181.2	3.21584	4.78717	8.51688	2.9e-16	1.09e-14	26.236
AL008729.1	1.50754	3.61122	8.51631	2.92e-16	1.09e-14	26.2319
AC245052.4	1.52425	3.57088	8.48403	3.7e-16	1.37e-14	25.999
LINC02561	2.12505	2.54887	8.46559	4.23e-16	1.54e-14	25.8663
AP003419.3	1.69492	2.64868	8.45296	4.65e-16	1.68e-14	25.7755
EDIL3-DT	1.77954	2.05462	8.44289	5e-16	1.8e-14	25.7032
AL390728.6	1.51738	7.21343	8.43852	5.16e-16	1.85e-14	25.6718
LINC02367	1.83437	3.33962	8.40636	6.53e-16	2.32e-14	25.4413
AC073842.2	1.70929	2.38064	8.39609	7.04e-16	2.49e-14	25.3678
AL359513.1	1.57063	3.33486	8.38822	7.46e-16	2.63e-14	25.3116
AC007773.1	1.64578	4.19713	8.38813	7.46e-16	2.63e-14	25.311
AC009005.1	1.81914	3.67573	8.3776	8.06e-16	2.8e-14	25.2357
AC116049.1	2.5457	2.4723	8.37344	8.3e-16	2.88e-14	25.2061
AP001178.3	1.62923	1.6522	8.37003	8.51e-16	2.94e-14	25.1817
GUSBP11	1.80653	5.40552	8.35143	9.75e-16	3.36e-14	25.0491
AC078909.2	1.67455	1.86728	8.34218	1.04e-15	3.59e-14	24.9832
AL021807.1	1.95155	3.09029	8.33301	1.11e-15	3.82e-14	24.918
DUXAP8	2.71071	4.72281	8.32753	1.16e-15	3.97e-14	24.879
LINC02163	3.34654	3.0753	8.22234	2.48e-15	8.08e-14	24.1346
C2CD4D-AS1	1.73022	6.11629	8.20338	2.84e-15	9.13e-14	24.0012
AL831711.1	1.53486	2.67031	8.18014	3.35e-15	1.07e-13	23.838
HRAT92	2.35648	4.31086	8.15307	4.07e-15	1.28e-13	23.6481
LINC01389	1.58207	3.6442	8.07685	7.01e-15	2.14e-13	23.1163
MCM3AP-AS1	1.54541	5.29172	8.07033	7.34e-15	2.23e-13	23.0711
TYMSOS	1.6354	5.289	8.05054	8.45e-15	2.55e-13	22.9336
AC111000.4	2.17316	5.38713	8.04395	8.85e-15	2.65e-13	22.8879
LINC01136	1.84308	2.56486	8.03333	9.54e-15	2.84e-13	22.8144
AL356608.3	1.74198	2.94928	8.02728	9.96e-15	2.94e-13	22.7725
HEXA-AS1	1.60257	3.28845	8.02201	1.03e-14	3.04e-13	22.736
AC025171.4	1.59488	3.35037	8.02191	1.03e-14	3.04e-13	22.7353
ATP2A1-AS1	1.55458	1.85315	8.01532	1.08e-14	3.18e-13	22.6897
LINC00106	1.60261	3.89636	8.01402	1.09e-14	3.2e-13	22.6807
LINC00235	1.53981	4.14769	7.99759	1.23e-14	3.58e-13	22.5672
AC084018.1	1.83951	4.19254	7.97506	1.44e-14	4.15e-13	22.4118
AL121899.1	1.8617	3.52023	7.96441	1.55e-14	4.44e-13	22.3385
MIR924HG	2.71921	3.08081	7.93785	1.87e-14	5.27e-13	22.1559
AC022211.2	1.6587	4.29774	7.93421	1.92e-14	5.38e-13	22.1309
FIGNL2-DT	1.57803	2.10213	7.932	1.95e-14	5.46e-13	22.1157
AL358075.2	1.51374	1.73033	7.91167	2.25e-14	6.2e-13	21.9764
KCNMB2-AS1	2.7836	3.89243	7.87726	2.86e-14	7.8e-13	21.7411
AC004080.2	2.39838	2.11555	7.86714	3.06e-14	8.33e-13	21.6721
STPG3-AS1	1.86414	4.6213	7.86361	3.14e-14	8.51e-13	21.648
LINC01126	1.68932	3.08858	7.84588	3.55e-14	9.56e-13	21.5272
AC092117.1	1.55479	4.13681	7.83152	3.93e-14	1.05e-12	21.4296
LINC02835	3.07347	2.73104	7.8267	4.06e-14	1.09e-12	21.3968
LINC01762	1.77698	2.46034	7.82366	4.15e-14	1.11e-12	21.3761
AC093642.2	1.55583	2.69873	7.78607	5.38e-14	1.41e-12	21.1213
FBXL19-AS1	1.61307	5.16805	7.77913	5.65e-14	1.48e-12	21.0743
PCAT6	1.6433	5.70987	7.76439	6.25e-14	1.62e-12	20.9747
LINC01341	1.63292	5.06534	7.74088	7.35e-14	1.9e-12	20.8161
THBS4-AS1	1.5518	4.33787	7.73953	7.42e-14	1.91e-12	20.807
LINC02804	1.65295	2.72045	7.73753	7.52e-14	1.94e-12	20.7935
LINC01719	1.64849	5.51182	7.73016	7.91e-14	2.03e-12	20.7439
ZMIZ1-AS1	1.60083	4.78581	7.69123	1.03e-13	2.6e-12	20.4824
LINC01532	2.43297	2.31776	7.67225	1.18e-13	2.95e-12	20.3552
AL356234.2	2.46857	3.24247	7.62457	1.63e-13	4e-12	20.0368
AL031600.1	1.64929	2.66562	7.6218	1.66e-13	4.07e-12	20.0183
LINC01607	1.6538	3.6293	7.55108	2.69e-13	6.47e-12	19.549
ST8SIA6-AS1	3.77105	4.93478	7.54868	2.73e-13	6.57e-12	19.5332
AP006222.2	2.99939	2.78382	7.53325	3.03e-13	7.22e-12	19.4312
AC090192.2	2.83963	2.89262	7.52978	3.1e-13	7.35e-12	19.4083
AC091182.1	1.70749	3.42815	7.5101	3.54e-13	8.3e-12	19.2786
AL121772.1	1.62736	2.84454	7.50776	3.6e-13	8.4e-12	19.2632
LINC01572	1.67011	2.71392	7.50652	3.63e-13	8.46e-12	19.255
SERTAD4-AS1	1.9064	3.20638	7.5034	3.71e-13	8.63e-12	19.2345
AL590652.1	1.99303	3.38271	7.50172	3.75e-13	8.7e-12	19.2234
LINC01224	2.82106	2.89963	7.47327	4.54e-13	1.04e-11	19.0365
BAALC-AS1	1.7493	5.60906	7.42737	6.17e-13	1.38e-11	18.7361
LINC00622	1.50879	3.47974	7.40493	7.17e-13	1.59e-11	18.5897
RBFADN	1.58259	3.29843	7.39084	7.88e-13	1.73e-11	18.498
NPSR1-AS1	2.99905	2.95523	7.36332	9.46e-13	2.05e-11	18.3192
DNM1P35	1.65213	3.78155	7.31958	1.26e-12	2.7e-11	18.0361
FAM182B	1.6794	3.1714	7.31287	1.32e-12	2.82e-11	17.9927
MIR600HG	1.59332	5.88698	7.30503	1.39e-12	2.96e-11	17.9422
AC074286.1	1.71389	1.9976	7.28945	1.54e-12	3.25e-11	17.8418
AP002807.1	1.58542	4.25834	7.27874	1.65e-12	3.47e-11	17.773
TFAP2A-AS1	2.08543	2.28104	7.27796	1.66e-12	3.48e-11	17.7679
LINC01535	2.12606	2.87012	7.27404	1.71e-12	3.56e-11	17.7427
AP000561.1	2.54148	2.98148	7.25604	1.92e-12	3.98e-11	17.6271
LINC00607	2.03496	4.18903	7.25592	1.92e-12	3.98e-11	17.6264
AC008735.2	1.57343	4.41815	7.25213	1.97e-12	4.07e-11	17.6021
AL513128.3	1.56903	2.25949	7.18204	3.12e-12	6.28e-11	17.1544
FEZF1-AS1	2.76887	3.07327	7.17734	3.22e-12	6.44e-11	17.1246
LINC01451	2.21732	5.70624	7.12208	4.61e-12	9.09e-11	16.7742
AL096854.1	2.42604	3.52215	7.09699	5.42e-12	1.05e-10	16.6158
AC093515.1	2.49778	2.28323	7.08426	5.88e-12	1.14e-10	16.5356
FIRRE	2.09683	3.67279	7.06647	6.6e-12	1.27e-10	16.4237
LINC02365	3.24121	4.32951	7.06467	6.67e-12	1.29e-10	16.4124
LINC00355	2.78074	2.52452	7.03567	8.04e-12	1.53e-10	16.2306
AL118511.2	1.60956	1.69485	6.98127	1.14e-11	2.09e-10	15.8911
AC073263.1	1.52126	2.17618	6.94852	1.4e-11	2.54e-10	15.6876
AP000525.1	1.68884	2.0875	6.9429	1.45e-11	2.63e-10	15.6528
AC103718.1	1.61169	1.59673	6.93985	1.48e-11	2.68e-10	15.6339
TLX1NB	1.75125	2.13983	6.93771	1.5e-11	2.71e-10	15.6206
AC107419.1	2.20382	2.20733	6.92485	1.63e-11	2.93e-10	15.5411
LINC02476	3.21238	2.97356	6.91936	1.69e-11	3.03e-10	15.5071
LINC01108	2.03212	2.67154	6.90877	1.81e-11	3.22e-10	15.4418
SLC9A3-AS1	1.78823	7.5706	6.88503	2.1e-11	3.7e-10	15.2955
HOXD-AS2	1.65069	1.64774	6.86496	2.38e-11	4.15e-10	15.1721
AC012236.1	2.01743	4.89308	6.84451	2.71e-11	4.7e-10	15.0467
AC024230.1	2.30676	2.14643	6.84212	2.75e-11	4.76e-10	15.0321
LINC01419	4.25023	3.85546	6.83772	2.83e-11	4.88e-10	15.0051
AL355987.4	1.58844	3.87983	6.82827	3e-11	5.15e-10	14.9473
AC090164.2	1.70796	2.80793	6.78929	3.83e-11	6.47e-10	14.7095
AC009236.1	2.35535	2.82253	6.78175	4.01e-11	6.75e-10	14.6637
AP003469.2	1.87076	1.9614	6.75522	4.74e-11	7.89e-10	14.5026
AL021392.1	1.61489	2.7674	6.72853	5.59e-11	9.21e-10	14.3411
TEX41	2.51713	4.93373	6.72653	5.66e-11	9.32e-10	14.329
AC006525.1	2.026	1.87878	6.7198	5.9e-11	9.68e-10	14.2884
GAPLINC	1.83503	3.5963	6.71875	5.94e-11	9.73e-10	14.282
AC006460.1	2.21391	4.0878	6.71843	5.95e-11	9.74e-10	14.2801
AC099520.1	1.70557	1.52444	6.70784	6.36e-11	1.03e-09	14.2163
AC036108.2	1.59668	2.70638	6.66482	8.29e-11	1.32e-09	13.9577
MIR2052HG	2.25491	2.2441	6.66449	8.31e-11	1.32e-09	13.9557
AL590705.1	1.6879	2.59876	6.65441	8.84e-11	1.4e-09	13.8953
LINC01426	2.29429	5.41646	6.64223	9.53e-11	1.51e-09	13.8224
AC016550.2	1.79816	1.60611	6.63782	9.79e-11	1.54e-09	13.796
AC010378.1	2.65222	3.40467	6.61851	1.1e-10	1.72e-09	13.6808
LINC01615	1.50135	1.93754	6.61166	1.15e-10	1.79e-09	13.6399
LINC02241	3.02589	2.87586	6.60988	1.16e-10	1.81e-09	13.6293
AL109976.1	1.52456	2.57913	6.60343	1.21e-10	1.88e-09	13.5909
AL109615.2	1.78509	2.4772	6.59943	1.24e-10	1.92e-09	13.5671
AL031731.1	1.50993	2.17975	6.59469	1.27e-10	1.97e-09	13.539
LINC02313	1.71983	1.97892	6.58126	1.38e-10	2.12e-09	13.4592
AC117386.2	2.22432	2.30881	6.52873	1.9e-10	2.85e-09	13.1484
LINC00511	2.36575	5.68526	6.50745	2.17e-10	3.24e-09	13.0232
LINC02882	2.98901	2.89807	6.48077	2.55e-10	3.76e-09	12.8665
AL109615.3	2.28644	3.75772	6.45749	2.93e-10	4.29e-09	12.7303
AC093895.1	2.12751	2.08002	6.44366	3.18e-10	4.63e-09	12.6495
AC092667.1	1.54965	2.36499	6.43127	3.43e-10	4.95e-09	12.5773
AC091987.1	1.85349	1.65492	6.4147	3.78e-10	5.41e-09	12.4809
LINC00665	2.1356	7.20082	6.40966	3.9e-10	5.56e-09	12.4516
LINC01524	1.85772	2.14698	6.39379	4.29e-10	6.09e-09	12.3595
AL163953.1	1.82766	2.18841	6.39262	4.32e-10	6.12e-09	12.3528
AC015631.1	2.12555	1.97489	6.34044	5.89e-10	8.17e-09	12.0514
AL136372.2	3.49959	4.09909	6.33896	5.94e-10	8.23e-09	12.0429
AL138828.1	2.45007	3.96789	6.30698	7.18e-10	9.87e-09	11.8592
LINC01980	3.03309	2.90221	6.26086	9.42e-10	1.27e-08	11.5957
AFAP1-AS1	2.9882	3.79916	6.23101	1.12e-09	1.5e-08	11.426
AL590550.1	2.81253	3.3894	6.21625	1.22e-09	1.62e-08	11.3423
AC007639.1	1.82578	1.99727	6.18669	1.45e-09	1.89e-08	11.1752
AC099066.2	1.81186	4.39712	6.14711	1.83e-09	2.35e-08	10.9526
MAFA-AS1	1.98841	1.79393	6.12458	2.08e-09	2.64e-08	10.8264
AC114401.1	1.54561	1.52675	6.12416	2.09e-09	2.65e-08	10.824
AC093817.2	2.09019	2.1788	6.11008	2.26e-09	2.85e-08	10.7454
LINC01977	1.74096	2.62086	6.10087	2.39e-09	3e-08	10.694
LCAL1	2.81631	3.33656	6.0713	2.83e-09	3.51e-08	10.5295
AJ003147.2	1.74713	1.7128	6.06436	2.94e-09	3.65e-08	10.491
AC107959.3	1.72377	3.15789	6.04575	3.27e-09	4.03e-08	10.3878
VAC14-AS1	1.81373	4.5056	6.00253	4.18e-09	5.09e-08	10.1495
AC105118.1	1.9807	1.78713	5.97917	4.78e-09	5.76e-08	10.0212
LINC02588	1.99701	1.83321	5.97421	4.91e-09	5.9e-08	9.994
AL359636.2	1.57774	2.30786	5.93053	6.28e-09	7.42e-08	9.75548
AC092957.1	2.55359	2.33586	5.87905	8.38e-09	9.7e-08	9.4763
AC106900.1	1.57485	1.58083	5.87611	8.52e-09	9.86e-08	9.46041
AL691420.1	2.19867	1.97939	5.87096	8.77e-09	1.01e-07	9.43261
LINC02323	1.64844	1.84389	5.86633	9e-09	1.04e-07	9.40759
AP005230.1	1.588	1.58718	5.81113	1.22e-08	1.37e-07	9.11108
LUCAT1	2.23685	5.43405	5.78713	1.4e-08	1.54e-07	8.98284
AL117329.1	2.19417	2.61885	5.76244	1.6e-08	1.75e-07	8.85145
AC011503.1	1.76982	1.93281	5.6849	2.44e-08	2.59e-07	8.44189
AC090772.3	1.50597	2.22959	5.67023	2.65e-08	2.78e-07	8.36494
AC239809.3	1.82577	3.17397	5.66024	2.79e-08	2.92e-07	8.31263
LINC00906	1.5633	1.57895	5.65761	2.83e-08	2.96e-07	8.29887
AL359313.1	1.63685	1.56383	5.63916	3.13e-08	3.24e-07	8.20254
AL162582.1	2.05966	2.67693	5.63731	3.16e-08	3.27e-07	8.1929
LINC01446	2.45061	2.74882	5.63078	3.28e-08	3.37e-07	8.15884
ZFPM2-AS1	2.33755	4.63662	5.62143	3.44e-08	3.54e-07	8.11022
LINC01338	1.78212	1.67196	5.58571	4.17e-08	4.22e-07	7.92491
LNCAROD	2.29165	5.18625	5.57323	4.46e-08	4.48e-07	7.86041
LINC01748	2.21665	2.50752	5.56695	4.61e-08	4.61e-07	7.82803
LINC01194	2.2253	2.00288	5.56597	4.64e-08	4.63e-07	7.82296
LINC00896	1.67341	4.67384	5.54179	5.28e-08	5.22e-07	7.69851
TSPEAR-AS2	1.98342	5.25959	5.53521	5.46e-08	5.39e-07	7.66474
LINC01833	2.09384	1.90692	5.49398	6.8e-08	6.62e-07	7.45381
AL139023.1	1.67346	1.55952	5.45525	8.34e-08	7.98e-07	7.25694
RMST	1.59216	1.9078	5.45361	8.41e-08	8.04e-07	7.24865
LINC01611	1.75835	1.571	5.44632	8.74e-08	8.33e-07	7.21169
RNF157-AS1	1.70189	3.42996	5.44226	8.93e-08	8.48e-07	7.19117
AC023090.1	1.70449	1.70163	5.43389	9.33e-08	8.83e-07	7.14885
AL162413.1	1.93308	1.77682	5.42959	9.54e-08	8.99e-07	7.12718
LINC01234	2.41164	3.00987	5.36101	1.36e-07	1.25e-06	6.78291
AC090809.1	2.10017	2.01591	5.35833	1.38e-07	1.26e-06	6.76953
LINC02377	2.10413	2.0077	5.29164	1.95e-07	1.73e-06	6.4386
LINC02335	1.64115	1.49932	5.27172	2.16e-07	1.89e-06	6.34048
LINC01948	1.51486	4.90398	5.26313	2.26e-07	1.97e-06	6.29825
AL391056.1	1.86578	3.39002	5.25823	2.31e-07	2.01e-06	6.2742
CTD-2297D10.2	2.31546	2.8854	5.24826	2.44e-07	2.1e-06	6.22531
AC112178.1	1.88824	1.80371	5.23102	2.66e-07	2.27e-06	6.14094
AC069277.1	1.78274	1.88761	5.22338	2.76e-07	2.35e-06	6.10365
AC078993.1	1.74693	2.07674	5.21084	2.94e-07	2.5e-06	6.04249
LINC01287	3.12675	3.25107	5.18248	3.4e-07	2.86e-06	5.90476
AC011029.1	1.70015	1.9846	5.14951	4.01e-07	3.33e-06	5.74543
AC010894.2	1.90073	2.51966	5.11922	4.67e-07	3.84e-06	5.59986
AC079760.2	1.57697	1.95594	5.11416	4.79e-07	3.92e-06	5.57562
LINC02159	1.57535	1.67357	5.11081	4.87e-07	3.98e-06	5.5596
PURPL	1.93062	4.75712	5.10566	4.99e-07	4.08e-06	5.53494
AC105411.1	1.51137	3.20003	5.09171	5.35e-07	4.36e-06	5.46829
AC034213.1	1.51854	1.77411	5.06645	6.07e-07	4.9e-06	5.34803
AP000593.3	1.5415	1.86126	5.0267	7.38e-07	5.87e-06	5.1599
LINC01608	2.42651	2.56635	5.00726	8.12e-07	6.41e-06	5.06835
LINC00221	2.62217	2.66923	4.97999	9.28e-07	7.22e-06	4.94047
AC079466.1	2.93317	4.66325	4.92959	1.19e-06	9.05e-06	4.70576
AC122710.1	1.7103	1.56032	4.90861	1.31e-06	9.93e-06	4.60868
LINC02009	1.5912	2.3697	4.89865	1.38e-06	1.04e-05	4.56273
TSPEAR-AS1	1.63073	5.02158	4.89066	1.43e-06	1.08e-05	4.52591
AL157778.1	1.71251	1.64227	4.88214	1.49e-06	1.12e-05	4.48674
LINC02616	1.76026	1.61268	4.84788	1.76e-06	1.29e-05	4.32977
LINC01630	1.76154	1.82061	4.83855	1.84e-06	1.34e-05	4.28717
AC188616.1	1.53826	3.19623	4.79812	2.22e-06	1.6e-05	4.10352
BBOX1-AS1	1.5219	1.71263	4.79089	2.3e-06	1.65e-05	4.07082
LINC01036	1.68812	2.12709	4.75444	2.73e-06	1.93e-05	3.90667
LINC01681	1.64643	2.13216	4.73498	2.99e-06	2.1e-05	3.8195
AC018553.1	1.70695	3.51947	4.71886	3.23e-06	2.25e-05	3.74753
AC244102.3	1.74345	1.6443	4.59961	5.6e-06	3.76e-05	3.22192
MIR548XHG	1.71774	1.55517	4.59443	5.74e-06	3.83e-05	3.19936
LINC02228	1.68348	1.91434	4.59429	5.74e-06	3.83e-05	3.19876
LINC02404	1.92099	1.95786	4.5516	6.97e-06	4.57e-05	3.01377
LINC00942	1.98977	2.69284	4.52747	7.77e-06	5.05e-05	2.90988
LINC01151	1.52809	5.31454	4.47753	9.73e-06	6.14e-05	2.69648
AL670729.3	1.5466	2.62144	4.44775	1.11e-05	6.93e-05	2.57025
AC124067.4	1.7142	3.17395	4.44602	1.12e-05	6.98e-05	2.56297
AC025254.1	1.50677	1.32908	4.42542	1.23e-05	7.59e-05	2.47612
AC011632.1	1.53779	1.47645	4.35448	1.68e-05	0.000100839	2.17991
AF279873.3	1.60626	1.53299	4.34413	1.75e-05	0.000104976	2.13703
DLX6-AS1	1.50213	1.59669	4.30821	2.05e-05	0.000120804	1.98902
AP005262.1	1.86628	3.63809	4.29962	2.13e-05	0.000125014	1.95382
LINC01436	1.68919	3.14325	4.26251	2.49e-05	0.000144191	1.80238
LINC02109	1.62101	2.01608	4.21156	3.1e-05	0.00017582	1.5964
AC244102.4	1.58631	1.50568	4.18246	3.51e-05	0.000196913	1.47977
AL360169.3	1.7439	2.01675	4.17526	3.62e-05	0.00020236	1.45105
PART1	1.54035	1.61684	4.17051	3.69e-05	0.000206035	1.4321
AC111149.2	1.78781	4.27326	4.15656	3.91e-05	0.000217225	1.37664
AC092490.1	1.80044	3.321	4.10581	4.84e-05	0.00026148	1.17619
LINC00648	1.59971	1.75787	4.09031	5.16e-05	0.000277126	1.11543
SSTR5-AS1	2.07101	2.77151	4.07786	5.43e-05	0.000290558	1.06675
DSCR8	1.59096	1.49505	4.0703	5.6e-05	0.000298601	1.0373
AC007493.1	1.58128	1.6816	4.06632	5.7e-05	0.000303158	1.02178
LINC02506	1.9896	3.36494	3.81877	0.000154201	0.000736869	0.0854969
LINC02864	1.80938	2.51506	3.80622	0.000161961	0.000771025	0.0394814
LINC02055	1.62142	3.27261	3.69084	0.000252752	0.00115004	-0.376864
CASC9	1.91995	4.20749	3.43463	0.000651979	0.00266692	-1.25831

## Sheet: Table S7
#please cite:
#Zhou KR, Liu S, Cai L, et al. ENCORI: The Encyclopedia of RNA Interactomes.
#2.Li JH, et al.starBase v2.0: decoding miRNA-ceRNA, miRNA-ncRNA and protein-RNA interaction networks from large-scale CLIP-Seq data , Nucleic Acids Res. 2014 Jan;42:D92-7.
miRNAid	miRNAname	geneID	geneName	geneType	chromosome	start	end	strand	clipExpNum	degraExpNum	RBP	merClass	miRseq	align	targetSeq	pancancerNum
MIMAT0000098	hsa-miR-100-5p	ENSG00000234277	LINC01641	lincRNA	chr1	227618645	227618665	+	1	0	AGO1-4	7mer-m8	guGUUCAAGCCUAGAUGCCCAa	|| | :| | ||||||||	gcCAUGGCUGUA-CUACGGGUg	2
MIMAT0000098	hsa-miR-100-5p	ENSG00000231304	SGO1-AS1	processed_transcript	chr3	20227908	20227930	+	1	0	AGO1-4	7mer-m8	guguuCAAGCCU-AGAUGCCCAa	|| ||| |:|||||||	gagucGUGGGGAUUUUACGGGUg	1
MIMAT0000098	hsa-miR-100-5p	ENSG00000245060	LINC00847	lincRNA	chr5	180258655	180258675	+	1	0	AGO1-4	8mer	guguUCAAGCCUAGAUGCCCAa	:|||| |: ||||||||	ggguGGUUCUGG-CUACGGGUa	4
MIMAT0000098	hsa-miR-100-5p	ENSG00000225339	AL354740.1	lincRNA	chr6	34247624	34247645	+	1	0	AGO1-4	8mer	guguUCAAGCCUAGAUGCCCAa	:|| | |:|||||||	ggguGGUCAAGUUUUACGGGUa	6
MIMAT0000098	hsa-miR-100-5p	ENSG00000249574	AC226118.1	lincRNA	chr7	421744	421765	+	1	0	AGO2	7mer-m8	guguucaagcCUAGAUGCCCAa	|| |||||||	uccccaccaaGAAGUACGGGUg	2
MIMAT0000098	hsa-miR-100-5p	ENSG00000271122	AC018647.2	antisense	chr7	35737833	35737854	+	1	0	AGO1-4	8mer	gugUUCAAGCCUAGAUGCCCAa	|| || || |||||||	aagAAAUUGAAAUAUACGGGUa	5
MIMAT0000098	hsa-miR-100-5p	ENSG00000214188	ST7-OT4	sense_intronic	chr7	116608521	116608541	+	1	0	AGO1-4	7mer-m8	guguucAAGCCUAGAUGCCCAa	||: || ||||||||	ugauuaUUUCGA-CUACGGGUg	2
MIMAT0000098	hsa-miR-100-5p	ENSG00000254635	WAC-AS1	antisense	chr10	28821015	28821038	-	1	0	AGO1-4	7mer-m8	guGUUCAAG--CCUAGAUGCCCAa	|:| || ||: :|||||||	cuCGACCUCCGGGGCUUACGGGUc	6
MIMAT0000098	hsa-miR-100-5p	ENSG00000189238	LINC00943	lincRNA	chr12	127221683	127221705	+	5	0	AGO1-4	8mer	guGU-UCAAGCCUAGAUGCCCAa	|| || | | |||||||	acCACAGAUACCAGAUACGGGUa	3
MIMAT0000098	hsa-miR-100-5p	ENSG00000176124	DLEU1	processed_transcript	chr13	50656486	50656507	+	1	0	AGO1-4	7mer-m8	gugUUCAAGCCUAGAUGCCCAa	|:|| | |||||||	uggAGGUAAACAAAUACGGGUc	9
MIMAT0000098	hsa-miR-100-5p	ENSG00000259932	AC051619.7	sense_intronic	chr15	45490887	45490908	-	9	0	AGO1,AGO1-4	7mer-m8	guguucaagccuaGAUGCCCAa	||||||||	cagaagccaacccCUACGGGUc	2
MIMAT0000098	hsa-miR-100-5p	ENSG00000265100	AC005332.1	antisense	chr17	66243173	66243194	-	1	0	AGO1-4	7mer-m8	guguucaagccuagAUGCCCAa	|||||||	uuuuuuuuuuuuaaUACGGGUu	7
MIMAT0000098	hsa-miR-100-5p	ENSG00000261526	AC012615.1	lincRNA	chr19	1875447	1875469	-	1	0	AGO1-4	7mer-m8	gugUUCAAGCCUAG-AUGCCCAa	|| || || |||||||	gggAAACCCGUUUCUUACGGGUc	14
MIMAT0000098	hsa-miR-100-5p	ENSG00000234684	SDCBP2-AS1	antisense	chr20	1358670	1358694	+	1	0	AGO2	7mer-m8	guGUUC---AAGCCUAGAUGCCCAa	|||| ||| | |||||||	ucCAAGCCCUUCCCCUAUACGGGUc	2

## Sheet: Table S8
gene	logFC	pValue	fdr	lowMean	highMean
FAM83A-AS1	-2.73427	5.05e-12	2.17e-11	17.267	2.5949
APOA4	-2.03282	0.027677	0.032936	408.171	99.7478
SAA1	-2.0028	5.52e-07	1.23e-06	5405.38	1348.72
SAA2	-1.98733	4.55e-05	7.84e-05	242.91	61.2633
AL021940.1	-1.96365	0.007349	0.009416	0.735111	0.188467
PLA2G2A	-1.73782	0.000168	0.000269	1143.95	342.981
AC098969.2	-1.69547	0.007867	0.010042	0.385988	0.119176
CALCA	-1.56354	0.01727	0.021099	9.02844	3.05449
LINC01702	-1.53662	3.88e-13	1.95e-12	25.5418	8.80403
AC022167.4	-1.52106	0.004973	0.006516	1.8772	0.654072
MT1X	-1.46537	1.05e-06	2.26e-06	82.179	29.7606
C9	-1.43599	9.19e-06	1.74e-05	356.99	131.941
HP	-1.38343	2.22e-21	5.12e-20	4977.95	1908.08
AC097637.3	-1.38229	4.22e-08	1.09e-07	1.08789	0.417324
TTC36	-1.37763	8.15e-09	2.32e-08	12.8368	4.94026
CYP2A7	-1.37509	0.001228	0.001746	100.881	38.8924
AP001042.1	-1.35814	1.77e-08	4.8e-08	1.26355	0.49289
MT2P1	-1.34729	2.11e-05	3.81e-05	19.2924	7.5825
AC087379.2	-1.33045	0.008123	0.010352	4.05075	1.61075
CYP1A2	-1.31839	0.001039	0.001492	108.763	43.6121
MT2A	-1.31496	3.32e-05	5.83e-05	1966.44	790.383
AC011317.1	-1.29887	4.95e-07	1.11e-06	6.02167	2.44748
AQP8	-1.29869	0.002846	0.003857	13.1672	5.35244
AC239800.2	-1.29578	8.09e-13	3.89e-12	5.46179	2.22467
MT1G	-1.2752	0.008755	0.011115	1235.66	510.535
MT1XP1	-1.20471	0.000426	0.000644	5.49225	2.38286
NNMT	-1.19529	0.000108	0.000177	615.464	268.773
HPD	-1.18569	3.13e-15	2.15e-14	1677.07	737.262
APOC1P1	-1.17447	1.58e-07	3.78e-07	224.034	99.2575
UGT1A3	-1.16714	0.042134	0.049041	4.8841	2.1749
AP001830.2	-1.1669	0.035446	0.041641	0.381703	0.170002
AL356317.1	-1.16672	0.000169	0.00027	0.268894	0.119774
SPDYC	-1.15696	0.000776	0.001133	9.90062	4.43999
MT1E	-1.15487	0.001773	0.002465	412.916	185.443
AL139385.1	-1.14475	0.000228	0.000357	1.25571	0.567918
SMUG1P1	-1.14218	1.63e-05	2.98e-05	1.76256	0.798572
MT1M	-1.13504	0.012219	0.01522	208.767	95.0562
AC068228.3	-1.12532	6.74e-09	1.94e-08	1.288	0.590422
AC092068.2	-1.1221	0.009844	0.012408	0.277198	0.127351
LAMA5-AS1	-1.11227	2.54e-09	7.7e-09	10.9517	5.06586
SDS	-1.10726	1.47e-08	4.04e-08	614.071	285.036
AL354872.1	-1.09646	1.43e-13	7.64e-13	32.6952	15.2904
FITM1	-1.09224	8.46e-07	1.84e-06	3.80197	1.78324
AKAIN1	-1.08498	0.032921	0.038819	0.174306	0.082168
AC025062.3	-1.083	0.002574	0.003506	2.23359	1.05436
DCXR	-1.07008	1.59e-13	8.46e-13	1134.78	540.488
SLC27A5	-1.06776	3.38e-15	2.31e-14	155.945	74.3949
LINC00570	-1.05892	0.000707	0.001037	0.954806	0.458298
CYP3A4	-1.05486	0.000468	0.000702	1251.88	602.584
PCK1	-1.03175	8.63e-13	4.13e-12	367.194	179.601
HPR	-1.02828	1.05e-12	4.96e-12	567.741	278.36
AC007423.1	-1.01659	0.022929	0.027579	11.0054	5.43977
CYP8B1	-1.01306	2.19e-10	7.62e-10	270.845	134.202
MFSD2A	-0.99877	5.56e-06	1.08e-05	39.2081	19.6208
AC079061.1	-0.99654	8.85e-06	1.68e-05	0.979156	0.490753
CTH	-0.9934	4.9e-09	1.43e-08	110.057	55.2807
AQP7P2	-0.99044	5.45e-05	9.29e-05	0.327769	0.164974
SLC25A15P3	-0.98433	0.006924	0.008904	3.34951	1.69305
HSD11B1	-0.98416	2.97e-06	5.98e-06	722.317	365.144
GPT	-0.97345	3.9e-14	2.26e-13	109.286	55.6579
ITLN2	-0.96321	0.000846	0.00123	1.75547	0.900403
LINC00844	-0.95791	1.34e-06	2.84e-06	5.58734	2.87637
ASPDH	-0.95733	1.53e-11	6.18e-11	85.0641	43.8088
ADH1B	-0.94161	3.54e-07	8.08e-07	496.56	258.534
FGL1	-0.938	8.74e-07	1.9e-06	1158.78	604.831
AC137723.1	-0.93493	4.22e-06	8.35e-06	4.13297	2.16183
AP003174.1	-0.93309	3.67e-07	8.38e-07	2.00974	1.05258
APOC1	-0.92785	1.68e-12	7.68e-12	4528.68	2380.46
AC011591.1	-0.92694	6.27e-05	0.000106	4.87246	2.56278
IFI27	-0.92332	0.007742	0.009892	274.464	144.723
GLYAT	-0.9212	5.68e-10	1.87e-09	77.2792	40.8087
UGT1A2P	-0.91892	0.029007	0.034419	10.8004	5.71241
AL132875.3	-0.91377	0.001683	0.002347	0.070207	0.037266
AC100849.2	-0.91105	0.037585	0.044002	0.14055	0.074744
CCDC196	-0.91061	0.000455	0.000685	0.738602	0.392907
AC007326.2	-0.89383	1.82e-05	3.31e-05	0.057009	0.030681
AGXT2	-0.89292	1.46e-10	5.2e-10	33.4889	18.0346
NAT2	-0.89129	1.26e-06	2.68e-06	18.0377	9.72473
KPNA4P1	-0.88412	0.008778	0.011143	0.204665	0.110891
LINC00535	-0.88104	0.000198	0.000314	1.38888	0.754132
IDH2-DT	-0.87702	0.000382	0.00058	0.520548	0.283433
HEPACAM	-0.87528	0.020435	0.024714	7.45492	4.06404
AC138356.1	-0.86745	3.57e-05	6.25e-05	0.794836	0.43566
HBA2	-0.8574	0.009252	0.01171	30.139	16.6351
AC005229.1	-0.85565	0.016683	0.02041	0.237288	0.131129
LINC01863	-0.85177	0.002034	0.002807	0.449739	0.249202
PAGE4	-0.84491	0.032748	0.038625	45.3419	25.2439
AC010872.2	-0.84475	9e-06	1.7e-05	4.68311	2.60758
ESR1	-0.84428	0.001542	0.002161	2.00546	1.11702
ANG	-0.84373	1.29e-08	3.56e-08	479.527	267.194
RIDA	-0.83993	6.01e-16	4.67e-15	590.269	329.767
DCXR-DT	-0.83748	3.07e-09	9.22e-09	18.4035	10.2989
FP325317.1	-0.83253	0.009985	0.012579	0.471514	0.264775
AC097063.1	-0.82628	0.002976	0.004022	0.223238	0.125902
SNORD3H	-0.82394	0.001325	0.001874	1.51503	0.855834
ACSM2A	-0.82171	3.01e-13	1.54e-12	79.6816	45.0814
IGFBP2	-0.81975	4.98e-06	9.75e-06	366.492	207.632
CYP1A1	-0.81875	0.000421	0.000637	67.7875	38.4309
HBB	-0.81752	0.037327	0.043724	42.0095	23.8369
TERB2	-0.81692	0.037703	0.044129	0.820663	0.465853
AQP7P4	-0.81667	0.008017	0.010226	0.143482	0.081462
ADH4	-0.81594	1.07e-05	2.01e-05	814.613	462.73
LINC00967	-0.81399	0.033408	0.039368	0.123789	0.070412
AC099329.2	-0.80326	1.44e-06	3.03e-06	1.63151	0.934944
ASS1P7	-0.80085	2.18e-05	3.94e-05	0.062962	0.036141
AC008549.1	-0.79893	0.002406	0.00329	22.485	12.9238
CYP2E1	-0.79757	0.002414	0.003299	878.941	505.67
C8A	-0.79146	8.3e-12	3.46e-11	298.171	172.27
AC062004.1	-0.79092	0.001942	0.002689	0.148143	0.085623
AQP7P3	-0.78831	0.000256	0.000398	0.327798	0.189802
AC009812.2	-0.78831	0.003098	0.004174	1.14469	0.6628
ZFY-AS1	-0.78652	0.006732	0.008673	0.43404	0.251631
AC007130.1	-0.78618	3.61e-07	8.24e-07	3.95653	2.29429
AL136419.1	-0.78298	1.88e-06	3.9e-06	0.88915	0.516745
AC008035.1	-0.78182	6.73e-05	0.000113	4.26675	2.48169
MASP2	-0.77664	1.61e-13	8.58e-13	139.231	81.2722
PRAP1	-0.77281	1.95e-06	4.04e-06	13.4336	7.86239
AC013701.2	-0.77139	0.006218	0.008037	0.116315	0.068144
SYN3-AS1	-0.7708	4.08e-06	8.09e-06	4.31318	2.52792
AC120042.1	-0.76594	1.44e-05	2.66e-05	1.04883	0.616788
LINC02259	-0.76536	6.38e-06	1.23e-05	0.575645	0.338656
AL157373.2	-0.76201	2.43e-06	4.96e-06	3.2735	1.9303
AZGP1	-0.75842	5.66e-11	2.12e-10	987.686	583.862
DIS3L2P1	-0.75568	2.06e-06	4.24e-06	0.223046	0.132103
AL360013.3	-0.75567	9.42e-06	1.78e-05	7.82163	4.63252
CHCHD2P7	-0.75535	0.012934	0.016058	0.309584	0.183398
AC100805.1	-0.74802	3.07e-07	7.07e-07	2.16651	1.28999
AJ003147.2	-0.74545	0.002214	0.003042	0.435505	0.25977
RDH16	-0.74491	3.78e-08	9.83e-08	150.292	89.6797
AC112206.2	-0.74361	1.08e-05	2.02e-05	2.58886	1.54618
IL32	-0.74281	0.000128	0.000208	433.941	259.312
AC002064.3	-0.74235	0.005207	0.006803	0.230898	0.138023
CFHR4	-0.73868	4.7e-07	1.06e-06	51.1107	30.6299
ASS1P9	-0.7355	2.9e-05	5.14e-05	0.253421	0.152207
AC016995.1	-0.73331	6.56e-06	1.27e-05	5.05011	3.03775
AL161668.4	-0.73297	0.008461	0.010758	7.01534	4.22089
AC008592.4	-0.73188	0.00057	0.000847	1.47421	0.88765
APOA5	-0.73152	9.36e-11	3.41e-10	372.575	224.391
APOC3	-0.73081	1.25e-10	4.48e-10	13737.8	8277.9
AL162726.3	-0.73077	0.035581	0.04179	0.414447	0.249739
AC008250.2	-0.73042	6.17e-05	0.000104	1.44759	0.872504
MT1DP	-0.72886	0.032215	0.038035	38.194	23.0455
CYP2C8	-0.72776	1.09e-05	2.03e-05	354.178	213.867
HGD	-0.72673	1.76e-13	9.3e-13	463.842	280.286
REN	-0.72474	0.02175	0.026226	4.51599	2.73264
RBP4	-0.72357	4.33e-15	2.91e-14	10658.3	6454.62
HPX	-0.72306	5.92e-11	2.21e-10	1964.14	1189.89
FBP1	-0.72205	4.06e-06	8.05e-06	211.651	128.311
LRCOL1	-0.71475	0.0023	0.003152	10.0415	6.11842
LCAT	-0.71102	2.08e-06	4.28e-06	51.1152	31.2257
AC134312.6	-0.71061	4.86e-05	8.35e-05	0.253991	0.155204
C6	-0.70769	2.37e-08	6.34e-08	166.73	102.089
ASS1P14	-0.7075	0.000937	0.001354	0.110334	0.067566
ORM2	-0.70738	1.2e-07	2.93e-07	2952.61	1808.27
CPS1	-0.70671	1.36e-09	4.29e-09	448.269	274.661
AC109454.3	-0.70507	0.002506	0.003418	2.10362	1.29039
BHMT	-0.70427	9.05e-07	1.96e-06	268.973	165.083
CFHR3	-0.7026	2.76e-06	5.6e-06	99.2298	60.9732
ADORA2BP1	-0.69589	6.75e-06	1.3e-05	6.90412	4.26212
ASPG	-0.69241	0.002278	0.003124	15.163	9.38317
ETFB	-0.6923	2.08e-06	4.28e-06	55.3482	34.2531
ACSM5P1	-0.68928	3.07e-05	5.42e-05	1.06545	0.660753
DNASE1L3	-0.68888	0.000519	0.000775	17.1821	10.6586
AC010336.2	-0.68764	4.89e-06	9.59e-06	0.798548	0.495793
AL162582.1	-0.68723	0.000462	0.000694	6.32206	3.92627
ETNPPL	-0.68493	2.28e-11	8.99e-11	74.5457	46.37
APCS	-0.68428	6.98e-08	1.75e-07	2827.8	1759.78
ACSM2B	-0.68349	1.11e-10	3.99e-10	104.743	65.219
AC123595.2	-0.68249	0.000318	0.000489	0.382268	0.238187
SLC1A2	-0.68063	1.84e-07	4.37e-07	10.1817	6.35233
AC133552.5	-0.68032	1.97e-09	6.05e-09	14.4983	9.04732
KCND3	-0.67998	0.000953	0.001375	5.52679	3.44969
SLC22A1	-0.6756	1.25e-05	2.32e-05	281.342	176.14
ADH1C	-0.67534	2.05e-05	3.71e-05	891.619	558.317
UPP2	-0.67266	1.52e-05	2.8e-05	11.8808	7.45339
CD300LG	-0.67127	6.29e-06	1.22e-05	0.870755	0.546793
AC096996.2	-0.66675	0.000323	0.000496	0.840897	0.529701
IGSF23	-0.66405	2.25e-06	4.6e-06	39.7296	25.0735
CIB3	-0.66007	0.001217	0.001731	0.206837	0.130896
LINC01900	-0.65942	0.003297	0.004423	0.817653	0.517684
MT1CP	-0.65914	5.33e-05	9.1e-05	10.0298	6.35142
UGT2B10	-0.65789	4.08e-08	1.05e-07	247.584	156.92
CPLX2	-0.65775	0.014043	0.017345	30.8446	19.5514
LINC01831	-0.65686	0.040271	0.046994	7.03877	4.4644
MTND6P3	-0.65657	0.000268	0.000416	0.243855	0.154697
UQCRQ	-0.65567	6.83e-13	3.32e-12	275.641	174.972
AC141273.1	-0.6556	8.13e-07	1.77e-06	0.763997	0.484993
AC008125.1	-0.65557	0.032558	0.038408	0.15379	0.09763
SEC14L2	-0.65506	5.05e-08	1.29e-07	73.8886	46.923
LINC01621	-0.65205	0.014923	0.018366	0.854219	0.543603
FGG	-0.65073	1.25e-10	4.48e-10	5164.74	3289.73
AC009119.2	-0.65071	0.031443	0.03718	1.14965	0.732285
FGA	-0.65052	4.36e-11	1.66e-10	8394.94	5348.02
TREH	-0.64824	0.023681	0.028438	4.38761	2.79955
AL390242.1	-0.64664	0.003033	0.004094	0.586396	0.374571
GALNT15	-0.64452	0.000153	0.000246	1.94656	1.24523
AC130343.3	-0.6444	0.001081	0.001549	0.325955	0.208532
LDHD	-0.64218	6.33e-12	2.68e-11	109.556	70.1975
CYP2C9	-0.64164	9.09e-07	1.97e-06	316.013	202.559
BX842568.3	-0.6416	1.96e-05	3.56e-05	3.87501	2.48388
CYP11A1	-0.64088	7.07e-07	1.55e-06	7.18128	4.6055
ASS1	-0.64	2.68e-08	7.12e-08	861.783	553.016
PRODH	-0.63973	0.005867	0.007613	5.79715	3.72081
PAPPA2	-0.63934	0.000173	0.000276	2.6214	1.68295
PEBP4	-0.63752	0.001182	0.001684	3.0571	1.96516
RPL12P14	-0.63363	0.000148	0.000238	8.0802	5.20812
TGFBR3L	-0.63338	2.08e-08	5.59e-08	3.22694	2.0803
TRAPPC13P1	-0.63146	0.007158	0.009187	1.10767	0.715024
GSTA7P	-0.62821	3.92e-08	1.02e-07	15.0965	9.7671
APOF	-0.62781	6.07e-06	1.18e-05	115.111	74.495
ADI1	-0.62701	3.12e-13	1.59e-12	231.997	150.223
MT-TE	-0.62668	0.000431	0.000651	1.30693	0.846454
GALP	-0.62621	0.001307	0.001851	0.864519	0.560103
GSTZ1	-0.62579	1.51e-05	2.77e-05	14.703	9.5285
ABCB11	-0.62558	5.55e-07	1.24e-06	33.9554	22.0085
ABCB4	-0.62551	1.19e-07	2.89e-07	53.7582	34.8455
SULT1A1	-0.62488	1.91e-07	4.53e-07	22.4308	14.5457
FOLH1B	-0.62405	0.009529	0.012038	3.54003	2.29695
AC009166.3	-0.62391	1.16e-06	2.47e-06	0.394392	0.255926
ZG16	-0.6232	0.004507	0.005935	11.4141	7.41035
SDSL	-0.62277	3.02e-05	5.34e-05	95.689	62.1428
AC233723.1	-0.6212	0.007921	0.010106	1.74428	1.13401
SEPTIN4	-0.61896	0.001608	0.002248	12.004	7.81632
AC083900.1	-0.61818	0.000346	0.000529	5.07538	3.30657
AC009093.5	-0.61751	0.000245	0.000382	2.66681	1.73822
DSG1	-0.61723	0.008293	0.010555	4.9999	3.25954
GSTA5	-0.61289	0.000181	0.000288	0.079483	0.051973
OGDHL	-0.60975	2.67e-08	7.08e-08	49.5068	32.4422
UGT1A4	-0.60942	0.011549	0.014434	72.5289	47.5398
AL031666.1	-0.60649	2.6e-06	5.29e-06	0.870758	0.571908
HSD17B6	-0.60628	7.99e-08	1.99e-07	574.612	377.457
PXMP2	-0.60609	4.47e-10	1.49e-09	15.3972	10.1156
LECT2	-0.60577	1.23e-05	2.29e-05	63.3258	41.6127
TAT	-0.60512	4.39e-11	1.67e-10	410.937	270.157
FGB	-0.6039	3e-09	9.02e-09	4877.6	3209.33
LINC02275	-0.6015	0.009157	0.011599	0.165888	0.109332
ARG1	-0.60116	6.07e-06	1.18e-05	494.735	326.142
OR7E29P	-0.60084	0.00193	0.002673	0.427904	0.282146
AOX1	-0.60057	0.003334	0.004469	432.656	285.334
SULT1B1	-0.60056	0.005764	0.007488	9.1891	6.06019
C1R	-0.59891	7.29e-08	1.83e-07	558.733	368.906
CCL16	-0.59863	2.97e-07	6.86e-07	160.372	105.906
ABCG2	-0.59862	0.008485	0.010789	16.2249	10.7146
RXRG	-0.59616	0.010223	0.012864	2.55339	1.6891
TTR	-0.59522	4.29e-06	8.49e-06	2974.78	1969.14
COX6A2	-0.59351	0.037584	0.044002	4.6584	3.08726
CA5A	-0.59323	5.29e-09	1.54e-08	24.4752	16.2236
AC020558.1	-0.59308	0.000251	0.000391	0.217504	0.144189
MOGAT2	-0.58847	5.78e-06	1.12e-05	20.9628	13.9412
AC040168.1	-0.58832	0.011149	0.013959	0.104163	0.069281
AC069444.2	-0.58815	0.010036	0.01264	0.027547	0.018324
AQP9	-0.58807	7.07e-05	0.000119	415.086	276.128
BAAT	-0.58622	3.06e-10	1.04e-09	365.812	243.662
HAO2	-0.58596	4.82e-05	8.28e-05	84.4965	56.2921
INSIG1	-0.5856	1.18e-08	3.29e-08	483.396	322.123
KCNB1	-0.5854	1.17e-06	2.48e-06	1.808	1.20497
GAPLINC	-0.58536	0.011629	0.014524	2.93185	1.95402
PON1	-0.5848	1.05e-07	2.58e-07	347.611	231.766
SLC51A	-0.5845	1.54e-06	3.23e-06	37.6897	25.1345
ACMSD	-0.58441	1.59e-08	4.33e-08	58.3467	38.9126
F9	-0.58229	5.84e-07	1.3e-06	162.348	108.433
AC244100.1	-0.58044	3.71e-08	9.66e-08	1.16098	0.776413
UGT2B7	-0.58013	1.92e-06	3.98e-06	383.301	256.391
DHODH	-0.57775	6.11e-09	1.77e-08	22.8514	15.3107
HAAO	-0.57603	7.61e-09	2.17e-08	152.93	102.586
AC007391.3	-0.57486	0.000297	0.000458	0.823901	0.553125
AL109955.1	-0.57332	0.000434	0.000655	0.074425	0.050019
TPPP2	-0.57073	0.025695	0.030705	1.60277	1.0791
LINC02428	-0.56892	0.000193	0.000306	3.65525	2.46409
TMEM92	-0.56856	0.002328	0.003188	11.1572	7.5232
ASS1P3	-0.56771	0.004725	0.006208	0.145634	0.098257
RNASE4	-0.56761	3.55e-06	7.08e-06	8.3446	5.6304
LINC02608	-0.56728	0.00207	0.002855	9.39459	6.34029
ALDH6A1	-0.56164	9.89e-06	1.86e-05	86.5188	58.6194
RDH5	-0.55987	9.83e-05	0.000162	4.15248	2.8169
LINC00659	-0.55823	0.026866	0.032033	4.82137	3.27436
C8B	-0.55817	1.38e-08	3.81e-08	355.748	241.611
LINC01818	-0.55708	0.000375	0.000571	0.760586	0.516954
AP001783.1	-0.55395	2.29e-05	4.11e-05	28.413	19.3536
TMEM256	-0.55379	0.005781	0.007508	46.6736	31.7955
HAO1	-0.54852	2.09e-09	6.41e-09	313.147	214.105
SRD5A2	-0.54759	0.000404	0.000612	14.4807	9.90716
RBP5	-0.54452	2.04e-07	4.8e-07	103.267	70.8016
CD5L	-0.54415	0.033766	0.039766	15.6498	10.7325
LEPR	-0.54287	0.00014	0.000227	44.7233	30.6982
LIVAR	-0.54138	2.59e-05	4.62e-05	9.18813	6.3133
AL590483.2	-0.53916	0.024691	0.029591	0.801818	0.551788
AL713852.1	-0.53451	0.001592	0.002227	0.146919	0.101432
PRKAG2-AS1	-0.53443	1.3e-07	3.16e-07	13.5933	9.38525
AC098680.2	-0.53343	0.023797	0.028569	0.129739	0.089638
AMDHD1	-0.53339	0.000312	0.00048	78.9501	54.549
TMEM82	-0.53181	0.000319	0.00049	34.8731	24.1212
SCUBE1	-0.53099	0.004767	0.006259	5.65942	3.91678
SERPINC1	-0.53044	2.96e-08	7.82e-08	4953.01	3429.18
CCDC177	-0.52975	0.000194	0.000307	1.00473	0.695953
CES5A	-0.52968	9.07e-06	1.71e-05	2.16068	1.49673
UNQ6494	-0.52885	0.004221	0.005579	0.533454	0.369742
SULT2A1	-0.52803	5.46e-05	9.31e-05	828.215	574.369
ENPP7	-0.52729	2.52e-05	4.5e-05	21.052	14.6071
SLC27A2	-0.5247	2.9e-08	7.66e-08	154.542	107.423
ACSM5	-0.52371	8.78e-07	1.9e-06	54.087	37.622
AC004832.5	-0.52336	1.19e-05	2.21e-05	3.80569	2.64781
FNDC5	-0.52313	0.014397	0.017757	32.1597	22.3787
ACSL5	-0.52281	0.000221	0.000346	81.039	56.4045
BOK-AS1	-0.52224	0.000166	0.000265	1.88771	1.31439
MTCO2P2	-0.52205	8.26e-05	0.000137	3.36525	2.3435
ALDH2	-0.51998	3.31e-09	9.9e-09	201.264	140.358
C4BPA	-0.51834	0.000201	0.000318	1442.81	1007.34
HNF4A-AS1	-0.51702	0.000634	0.000937	19.8525	13.8732
LYZL2	-0.51603	0.010802	0.013555	0.193788	0.135514
HTR2A-AS1	-0.51581	0.000501	0.00075	0.112946	0.078995
OTC	-0.51369	3.64e-06	7.26e-06	182.663	127.942
EFCAB12	-0.51332	3.12e-05	5.51e-05	2.01024	1.40839
RNU6-564P	-0.51329	0.025976	0.031021	1.27026	0.889975
LINC01485	-0.51238	4.59e-07	1.03e-06	29.4105	20.6187
DPYS	-0.51214	3.48e-06	6.96e-06	187.477	131.455
PLG	-0.5118	8.12e-06	1.55e-05	553.617	388.278
GREM2	-0.50969	0.002733	0.003711	14.515	10.195
C8G	-0.50296	7.57e-08	1.89e-07	751.348	530.194
SOD1	-0.50229	2.1e-11	8.34e-11	947.192	668.702
AC116312.1	-0.50197	0.004805	0.006306	0.555706	0.392406
LINC01620	-0.50193	1.54e-06	3.23e-06	0.475201	0.335568
ADHFE1	-0.50141	1.08e-06	2.31e-06	9.76473	6.89795
DHX8	0.500049	1.8e-12	8.21e-12	8.23843	11.6513
ALG2	0.500117	3.75e-13	1.89e-12	29.8081	42.1585
ASPH	0.50013	0.000137	0.000222	23.4827	33.2125
NDUFB4P8	0.500153	0.003165	0.004257	0.12807	0.181138
C1orf174	0.500233	3.52e-16	2.83e-15	8.76849	12.4025
PRPF8	0.500367	2.67e-11	1.04e-10	31.6079	44.7118
RBM8A	0.50056	3.93e-14	2.28e-13	20.1167	28.4603
AFAP1L1	0.500569	6.2e-07	1.37e-06	3.91147	5.53383
SLC45A1	0.500677	0.010395	0.013065	0.795323	1.12529
WIPI1	0.500711	1.79e-05	3.26e-05	9.07292	12.8374
USO1	0.500727	4.99e-09	1.46e-08	35.6808	50.4857
BAX	0.50074	4.25e-10	1.42e-09	50.1354	70.9386
TEX21P	0.500949	9.79e-07	2.11e-06	0.20909	0.295893
SNRPF	0.501027	3.4e-10	1.15e-09	29.4239	41.6413
RBM27	0.501069	5.26e-19	7.28e-18	5.10869	7.23014
GNAI3	0.501133	1.09e-12	5.13e-12	15.7453	22.2847
SPATA6L	0.501174	0.002922	0.003951	0.868037	1.22859
RPS11P5	0.501212	4.06e-06	8.05e-06	2.84158	4.02198
RNF32	0.501214	4.76e-09	1.39e-08	0.527912	0.747209
THAP10	0.501277	2e-05	3.63e-05	2.13987	3.02891
PELP1	0.501296	5.02e-12	2.16e-11	18.2924	25.8926
WDR36	0.501416	4.09e-14	2.37e-13	7.64177	10.8177
DCP1B	0.501513	1.74e-13	9.18e-13	5.23197	7.40689
SLC35B3	0.501543	1.64e-13	8.69e-13	15.6589	22.1687
KRBOX4	0.501555	7.5e-18	8.11e-17	5.31	7.51757
AL390755.3	0.501603	0.009399	0.011885	0.153166	0.21685
PLK2	0.501654	0.00109	0.00156	15.7692	22.3266
B4GAT1	0.501699	9.26e-10	2.98e-09	43.5899	61.7181
EEF1A1P17	0.501702	0.011565	0.014452	0.147522	0.208873
XPNPEP1	0.501707	4.89e-13	2.42e-12	10.3903	14.7115
AL590235.2	0.501796	0.003538	0.004726	0.269751	0.38196
SLC30A5	0.501802	2.36e-15	1.67e-14	11.6898	16.5526
AC116049.1	0.501847	0.00886	0.011242	0.982955	1.39189
TIGD5	0.50193	1.04e-08	2.92e-08	5.31555	7.52738
FHAD1	0.501992	2.75e-05	4.89e-05	0.162457	0.230066
DTNB	0.501994	8.76e-12	3.64e-11	2.91754	4.13173
ANKRD19P	0.502074	1.66e-06	3.46e-06	0.50097	0.709498
FAM204A	0.502117	6.01e-17	5.53e-16	2.96987	4.2062
RDH12	0.502178	0.019753	0.023947	3.26964	4.63095
AC107385.2	0.502184	0.04256	0.04951	52.549	74.428
ZCWPW2	0.502296	8.01e-08	2e-07	0.184723	0.261654
SNRPA	0.502309	4.47e-12	1.93e-11	39.4376	55.8625
SYT5	0.502354	0.019423	0.023576	0.174833	0.247655
CFAP410	0.502354	5.07e-11	1.91e-10	1.49662	2.12
RPL7P52	0.502357	0.008576	0.010898	0.058863	0.083381
H2AZ2	0.502391	8.18e-14	4.54e-13	39.658	56.178
GORASP1	0.502391	1.86e-17	1.87e-16	12.6846	17.9685
DNAJB12P1	0.50243	0.002456	0.003355	0.081126	0.114923
FKBP1C	0.502472	3.51e-06	7.02e-06	0.453992	0.643143
DANCR	0.502478	0.0079	0.010081	4.71653	6.68165
YBX1	0.502614	2.44e-07	5.7e-07	186.307	263.956
XPR1	0.502709	1.08e-10	3.9e-10	7.32694	10.3813
LMO4	0.502755	0.001428	0.00201	12.0457	17.0678
TPD52	0.502765	6.32e-07	1.4e-06	14.3899	20.3895
ZXDB	0.502773	1.37e-05	2.53e-05	8.28886	11.7448
RWDD2A	0.503066	9.63e-12	3.98e-11	4.20008	5.95245
AL390728.1	0.503256	0.002623	0.003569	0.028257	0.040052
YBX1P6	0.503417	0.012798	0.0159	0.154671	0.219256
KLF4	0.503454	0.002665	0.003624	7.5457	10.6968
WDTC1	0.503467	3.36e-11	1.3e-10	19.4915	27.6315
SMIM31	0.503524	0.018017	0.021968	0.998016	1.41486
TAOK2	0.503573	8.33e-13	4e-12	13.5763	19.2473
TRMT112P6	0.50361	0.014647	0.018046	0.606033	0.859207
AC005837.1	0.503635	0.000138	0.000223	0.153112	0.217079
DXO	0.503682	1.13e-13	6.13e-13	14.1381	20.0454
JPT1	0.503682	4.36e-07	9.84e-07	35.2879	50.0321
OSBPL2	0.503717	3.99e-19	5.67e-18	6.34792	9.00047
ZNF22	0.50372	1.26e-10	4.51e-10	22.2408	31.5345
AC007684.2	0.503881	0.001037	0.001489	0.380814	0.540003
THUMPD1	0.503952	2.58e-10	8.89e-10	9.58929	13.5985
AC083973.1	0.503955	0.036052	0.042301	0.017944	0.025446
MYH10	0.503972	5.46e-06	1.06e-05	12.0902	17.1452
AGTRAP	0.503988	5.86e-06	1.14e-05	21.9613	31.144
PPIL3	0.50403	6.27e-14	3.54e-13	10.7096	15.1881
AL353662.1	0.504052	0.000247	0.000385	0.163983	0.23256
RANBP1	0.504098	1.33e-10	4.75e-10	26.7098	37.8808
JDP2	0.504111	4.38e-05	7.57e-05	3.92887	5.57211
LTBP4	0.504116	0.003302	0.00443	11.4298	16.2103
VASN	0.504122	0.000119	0.000193	40.7727	57.8263
PDCD6IP	0.504125	6.32e-14	3.56e-13	25.1893	35.725
TMEM18	0.504172	5.78e-14	3.28e-13	4.2937	6.0898
AL118506.1	0.504227	2.52e-09	7.66e-09	2.12843	3.01888
TBK1	0.504249	1.33e-14	8.32e-14	3.20582	4.54708
NOL7	0.504302	4.26e-15	2.87e-14	46.748	66.3092
BNIP3L	0.504384	1.68e-05	3.07e-05	19.9039	28.234
LCA5L	0.504409	0.000282	0.000437	0.294903	0.418333
MEF2D	0.50441	1.47e-12	6.78e-12	21.6906	30.769
TSNARE1	0.504466	5.3e-11	1.99e-10	6.38511	9.05791
ZRANB1	0.504778	1.26e-07	3.07e-07	4.74404	6.73134
TMEM39B	0.504887	9.68e-14	5.32e-13	9.16239	13.0015
ZDHHC14	0.504961	3.11e-09	9.35e-09	5.11367	7.25674
RPL12P42	0.505034	0.00482	0.006325	0.231842	0.329021
PHOSPHO2	0.505119	8.83e-09	2.5e-08	2.14641	3.04627
CASP7	0.505153	8.16e-08	2.03e-07	12.4359	17.6499
WWC2-AS2	0.505155	2.97e-06	6e-06	0.601358	0.853492
AC026412.1	0.505156	1.34e-05	2.49e-05	4.79964	6.81201
MNAT1	0.505173	2.51e-12	1.12e-11	4.51238	6.40439
MID1	0.505233	0.000188	0.000298	4.29022	6.08934
NFKBIA	0.505292	1.98e-07	4.69e-07	118.621	168.372
IL18BP	0.505318	8.3e-06	1.58e-05	6.66066	9.45438
RHPN2	0.505324	2.18e-08	5.86e-08	16.4789	23.3908
DAPK3	0.505325	1.45e-11	5.87e-11	25.8071	36.6317
PARP3	0.505348	5.69e-08	1.44e-07	14.6557	20.8033
GATA6	0.505436	0.000179	0.000285	6.99808	9.93414
TIFA	0.505505	1.35e-06	2.85e-06	5.30901	7.53677
AC090398.2	0.50553	0.000115	0.000188	0.670315	0.951609
ERH	0.505592	1.95e-15	1.39e-14	109.228	155.071
RC3H2	0.505621	1.07e-12	5.06e-12	5.95401	8.45311
PARP14	0.505631	1.35e-11	5.48e-11	20.8334	29.5781
IL18R1	0.505675	0.014928	0.01837	2.18927	3.1083
ARHGEF12	0.505686	2.59e-08	6.9e-08	13.9063	19.7442
TLN2	0.5057	0.003762	0.005009	2.33996	3.32231
AL035420.3	0.505798	0.037794	0.044234	0.246936	0.350626
FAM76A	0.505848	5.96e-12	2.53e-11	3.92979	5.58013
REXO5	0.505868	2.6e-07	6.04e-07	3.14209	4.4617
NUDT1	0.50597	1.51e-08	4.13e-08	12.3341	17.5154
LPCAT2	0.506094	1.68e-05	3.07e-05	3.02255	4.29262
UBR4	0.506094	1.12e-09	3.57e-09	8.8808	12.6125
OSCP1	0.506095	0.008306	0.010569	2.15226	3.05664
LARGE1	0.506102	1.5e-08	4.11e-08	3.83265	5.44316
DCAF13	0.506121	7.95e-07	1.73e-06	9.79178	13.9065
AMOTL1	0.506201	0.000112	0.000183	7.00927	9.9553
LINC00896	0.506235	0.000729	0.001068	1.49235	2.11965
LMNTD2	0.506239	8.74e-06	1.66e-05	3.59204	5.10192
GIHCG	0.506288	0.000142	0.000229	1.50242	2.13402
ARHGEF5	0.506304	1.46e-07	3.51e-07	4.66764	6.62995
ALOX12P2	0.506308	0.013605	0.01684	0.863207	1.22611
AL451085.2	0.506319	0.000117	0.000191	0.265603	0.377269
TMEM248	0.506388	5.53e-20	9.44e-19	50.882	72.2773
TRBV2	0.506388	0.000276	0.000428	0.599974	0.852257
AC092428.1	0.506585	0.000122	0.000199	0.098259	0.139595
LURAP1	0.506595	0.034619	0.040716	0.230181	0.327017
ANP32AP1	0.506666	0.000465	0.000699	0.114559	0.162761
SDAD1	0.506732	2.65e-12	1.18e-11	18.1778	25.8276
ERBB3	0.506768	3.71e-10	1.25e-09	59.0632	83.9207
AC023483.1	0.506769	2.46e-06	5.02e-06	0.209845	0.298161
PSMD10	0.506772	2.16e-11	8.55e-11	30.0694	42.7246
TUSC1	0.506855	0.016234	0.019888	8.59944	12.2194
DEDD	0.506938	4.32e-18	4.89e-17	23.4933	33.3848
AC104836.1	0.507052	0.020839	0.025182	0.23986	0.340876
GDE1	0.507127	3.9e-09	1.16e-08	15.0536	21.3945
AC027601.2	0.507192	0.00075	0.001097	0.195218	0.277459
HES1	0.507197	5.23e-07	1.17e-06	44.1994	62.8199
APIP	0.507203	2.93e-14	1.74e-13	7.35106	10.448
NORAD	0.507214	1.02e-15	7.7e-15	85.5434	121.583
AL136162.1	0.50722	4.53e-09	1.33e-08	0.854705	1.2148
RNF215	0.507232	1.01e-11	4.15e-11	3.00517	4.27131
PPP2R1A	0.507294	4.96e-12	2.13e-11	60.572	86.0959
SCAPER	0.507309	1.48e-09	4.64e-09	2.10545	2.99268
AC064799.1	0.50731	8.46e-05	0.000141	1.64357	2.33616
EMC1-AS1	0.507312	4.32e-05	7.48e-05	0.484966	0.68933
DMAC2	0.507331	1.31e-17	1.36e-16	17.9365	25.4953
MS4A2	0.507407	0.033457	0.03942	0.173612	0.246788
FLVCR1-DT	0.507487	0.001548	0.002168	2.10579	2.99353
RPS4XP11	0.507494	0.01391	0.017191	0.375572	0.533905
RN7SL130P	0.507509	0.000501	0.00075	1.12866	1.60449
AF274853.1	0.507521	0.029845	0.035371	0.034076	0.048442
AC005632.3	0.507523	6.21e-06	1.2e-05	0.595972	0.847238
OLMALINC	0.507578	2.52e-06	5.13e-06	2.26204	3.21585
PHF11	0.507716	1.65e-13	8.75e-13	7.76379	11.0385
GOSR1	0.507735	4.98e-17	4.63e-16	9.19031	13.0669
SOX9-AS1	0.50778	4.55e-05	7.84e-05	0.566832	0.805955
BBIP1	0.50781	4.43e-13	2.2e-12	1.76816	2.51413
SMPD2	0.507832	2.16e-09	6.62e-09	8.30279	11.8058
ZNF689	0.507866	3.88e-10	1.31e-09	5.5486	7.8898
NTAQ1	0.507914	4.21e-08	1.09e-07	4.81946	6.85324
IGF2BP2-AS1	0.507929	0.01183	0.014763	0.162852	0.231576
AL034550.2	0.50796	0.001894	0.002626	0.040451	0.057523
RPS2P48	0.507975	0.000947	0.001367	0.152239	0.216492
DPEP2	0.508003	0.01355	0.016778	0.828747	1.17854
AC073270.1	0.508052	0.034128	0.04017	0.170877	0.24301
MYO5B	0.508075	1.78e-06	3.7e-06	6.17828	8.78645
SREBF2-AS1	0.508104	2.68e-07	6.21e-07	0.110933	0.157766
LYRM4	0.508118	9.85e-11	3.58e-10	13.3117	18.9318
TMEM185A	0.508176	1.04e-10	3.76e-10	2.19928	3.12793
KRT8P20	0.508187	0.035582	0.04179	0.03256	0.046308
ZNF579	0.508198	4.4e-07	9.94e-07	7.33045	10.4259
SURF6	0.508244	2.76e-15	1.92e-14	17.042	24.2392
DNAAF2	0.508251	2.94e-15	2.04e-14	10.0618	14.3111
RPL19P21	0.508344	5.33e-05	9.1e-05	0.466253	0.663206
SPATA20	0.508395	5.87e-07	1.3e-06	25.5078	36.284
TEN1	0.508452	0.003488	0.004663	0.032462	0.046178
PPIH	0.50852	5.94e-09	1.72e-08	4.31053	6.13212
TIPRL	0.508593	5.31e-17	4.92e-16	32.7686	46.6187
AL132780.2	0.50861	2.98e-09	8.97e-09	1.46133	2.07901
DSCAM	0.508782	0.019229	0.023356	0.023647	0.033646
MRPL17	0.508798	3.23e-09	9.69e-09	31.561	44.907
AC087071.2	0.508804	1.83e-05	3.33e-05	0.348592	0.496002
AC004022.1	0.508936	0.007858	0.010033	0.061361	0.087317
NFIB	0.508968	9.52e-05	0.000157	8.65188	12.3119
GRK6	0.509043	2.49e-13	1.29e-12	15.5	22.0581
LYPD1	0.50909	1.24e-05	2.31e-05	1.59047	2.26348
NACC2	0.509181	8.7e-12	3.62e-11	9.62486	13.6985
SLC2A11	0.509286	9.97e-08	2.46e-07	1.24186	1.7676
MRFAP1L1	0.509302	1.92e-17	1.92e-16	55.3075	78.7226
AC005410.2	0.509315	0.011132	0.013939	0.113979	0.162235
GOLGB1	0.509316	1.31e-12	6.07e-12	17.2636	24.5726
AL023755.1	0.509398	0.002611	0.003553	1.27709	1.81788
SPIRE2	0.509409	1.59e-06	3.32e-06	5.27046	7.50233
C5orf24	0.50941	6.11e-10	2.01e-09	17.7687	25.2931
ZNF414	0.509471	5.91e-17	5.44e-16	8.67376	12.3473
THAP9	0.509491	8.33e-14	4.62e-13	1.83674	2.61468
AC211433.2	0.509769	0.019863	0.02407	0.16852	0.239942
TOMM40	0.509798	7.79e-09	2.22e-08	46.1592	65.7238
SACM1L	0.509867	1.54e-14	9.52e-14	9.21763	13.1252
SYP	0.509954	2.8e-06	5.66e-06	1.0958	1.56042
CD164	0.510042	2.26e-12	1.02e-11	68.716	97.8578
FAM185BP	0.510081	1.05e-07	2.59e-07	0.729069	1.03829
HIPK4	0.510187	0.009407	0.011893	0.132127	0.18818
PPP2R2A	0.510227	5.41e-09	1.57e-08	5.4173	7.71572
RPS7P10	0.510245	0.000628	0.000928	2.38407	3.39561
YBX1P2	0.51031	3.22e-05	5.67e-05	0.589834	0.840134
STK11	0.510322	9.57e-18	1.02e-16	13.1171	18.6836
COMMD9	0.510385	4.49e-10	1.5e-09	13.2469	18.8693
RPS10P5	0.510427	0.000136	0.000219	0.450079	0.641125
DTWD1	0.510683	4.27e-16	3.39e-15	1.54071	2.19508
ZBTB42	0.510717	9.15e-10	2.94e-09	7.20939	10.2716
AC098935.1	0.510805	0.003154	0.004245	0.53444	0.761494
PLA2G15	0.510863	1.99e-06	4.11e-06	7.671	10.9304
AL137127.1	0.510907	4.58e-06	9.02e-06	0.271887	0.387424
AC013643.3	0.510909	0.005849	0.00759	0.034534	0.04921
ZC4H2	0.510957	3e-07	6.93e-07	3.03299	4.322
AL139289.1	0.511069	0.015621	0.019176	1.22031	1.73908
SUN2	0.511089	1.23e-05	2.29e-05	30.8944	44.0284
PPIAP74	0.511141	0.009407	0.011894	0.15836	0.225691
LINC02452	0.511141	0.029053	0.034469	0.050642	0.072175
BMP4	0.511145	9.69e-07	2.09e-06	9.48627	13.5196
TMEM60	0.5112	1.04e-12	4.93e-12	34.6315	49.3581
LAG3	0.511255	0.000136	0.00022	3.95686	5.63967
EDAR	0.511256	0.015475	0.019002	0.826078	1.1774
C22orf39	0.511282	1.53e-14	9.49e-14	4.74066	6.75694
RAB27A	0.511328	1.34e-05	2.48e-05	11.3255	16.1429
NLE1	0.511362	4.55e-10	1.52e-09	6.58706	9.38917
PDCL3	0.51143	1.36e-11	5.51e-11	19.496	27.7908
CLEC18A	0.51145	7.95e-05	0.000133	0.034847	0.049674
HTRA2	0.511519	5.57e-14	3.17e-13	12.1885	17.3753
RPUSD4	0.511531	2.13e-12	9.61e-12	10.9244	15.5734
PDZD9	0.511651	0.000263	0.000409	0.074594	0.106347
AP000845.1	0.51172	0.000127	0.000206	0.157346	0.224335
TAOK3	0.511721	1.54e-11	6.22e-11	7.27367	10.3704
AGPAT1	0.511734	2.41e-12	1.08e-11	22.2921	31.7833
AC095055.1	0.511736	0.02274	0.027368	0.372234	0.530718
RBMXP5	0.511738	0.00032	0.000491	0.183445	0.26155
CSRP2	0.511757	0.006298	0.008137	10.8887	15.525
LAMA4-AS1	0.511759	0.017524	0.021392	0.023553	0.033582
NCK1	0.511786	3.34e-11	1.29e-10	7.16895	10.2216
AL139274.2	0.511827	7.74e-08	1.93e-07	0.12036	0.171616
CHM	0.511843	4.02e-09	1.19e-08	3.55758	5.07265
SPSB3	0.511853	2.13e-05	3.85e-05	0.191279	0.272741
SPIN2B	0.511936	4.05e-08	1.05e-07	1.90526	2.71683
CNOT10	0.512083	1.99e-14	1.21e-13	10.3438	14.7514
RPL23AP67	0.512092	0.001846	0.002563	0.176601	0.251854
HPS1	0.512097	6.35e-12	2.69e-11	26.0468	37.146
RNF180	0.512152	0.001962	0.002715	1.35006	1.92543
SLC4A1AP	0.512208	1.2e-17	1.25e-16	10.157	14.4863
RBBP5	0.512208	2.49e-16	2.07e-15	13.712	19.5565
HECTD1	0.512239	1.65e-09	5.14e-09	17.7356	25.2957
GRIN2C	0.512256	2.97e-06	6e-06	0.164349	0.234407
TMEM17	0.512329	3.98e-10	1.34e-09	1.68363	2.40144
ZNF628	0.512343	2.63e-14	1.57e-13	4.36096	6.22032
DIAPH2-AS1	0.512392	3.3e-05	5.8e-05	0.052198	0.074456
ADARB1	0.512476	4.42e-07	9.99e-07	2.43989	3.48049
TMEM62	0.512529	3.06e-08	8.05e-08	6.4992	9.27142
HLCS	0.512538	3.65e-12	1.6e-11	5.11814	7.30132
RPL15P5	0.512589	4.31e-06	8.53e-06	0.452342	0.645314
TRIM39	0.51265	3.71e-18	4.27e-17	6.07066	8.66081
MCL1	0.512685	9.3e-11	3.39e-10	120.485	171.897
PPP1R15B	0.512712	1.05e-13	5.75e-13	36.7982	52.501
NIP7	0.512887	6.46e-10	2.12e-09	8.35427	11.9207
LDHAP7	0.512889	0.002234	0.003068	1.01421	1.44718
PRMT9	0.512949	5.48e-11	2.06e-10	3.14871	4.49309
RPSAP18	0.512952	0.002931	0.003963	0.901475	1.28638
HESX1	0.512953	1.58e-05	2.89e-05	1.08979	1.55509
AC106795.2	0.512995	0.000128	0.000208	0.378117	0.539576
IKZF5	0.513011	6.04e-12	2.57e-11	6.94673	9.91316
ZFYVE21	0.513029	3.57e-10	1.21e-09	3.01904	4.3083
LRRC42	0.513063	5.87e-09	1.7e-08	33.3139	47.5414
AC008481.2	0.5131	1.52e-05	2.79e-05	0.238845	0.340858
USP46-DT	0.513204	4.59e-08	1.18e-07	2.64995	3.78205
WASHC5	0.513271	6.74e-11	2.5e-10	19.4268	27.7275
UBE2L3	0.513333	3.68e-15	2.51e-14	39.8359	56.8595
ARNT	0.513337	4.36e-10	1.46e-09	26.1606	37.3403
RAB5A	0.513348	3.52e-18	4.07e-17	20.9419	29.8917
DNAJC8	0.51342	2.84e-15	1.97e-14	51.5777	73.6235
MYCBP	0.513468	2.23e-07	5.23e-07	7.88922	11.2617
KBTBD7	0.513469	2.22e-10	7.71e-10	3.57665	5.10558
PCGF6	0.513523	6.89e-12	2.9e-11	6.01466	8.58612
AP1B1	0.513561	3.78e-13	1.9e-12	34.6627	49.4834
KIF16B	0.513636	1.27e-08	3.51e-08	5.20788	7.435
EPS8	0.51375	7.25e-08	1.82e-07	12.4005	17.7049
SASH1	0.513779	8.53e-07	1.85e-06	3.44516	4.91895
AL022324.2	0.513846	3.09e-10	1.05e-09	0.423682	0.604955
NECTIN2	0.513872	2.23e-08	5.98e-08	117.582	167.893
NGEF	0.513878	2.03e-12	9.18e-12	16.8837	24.108
AKIRIN1	0.513893	9.79e-09	2.75e-08	33.0867	47.2445
AC011503.3	0.513907	0.024512	0.029391	0.223694	0.319415
EIF3CL	0.514022	3.31e-05	5.82e-05	0.207394	0.296163
TMEM182	0.514079	4.39e-15	2.95e-14	1.30685	1.86629
RPL5P5	0.514084	0.010535	0.013234	0.087229	0.124571
SPRYD3	0.514112	3.35e-13	1.7e-12	28.5677	40.7979
TUBB4B	0.514116	5.14e-06	1.01e-05	196.254	280.274
THUMPD3	0.514126	3e-18	3.51e-17	9.90205	14.1414
CHST13	0.514199	0.000151	0.000243	54.6521	78.0541
TSG101	0.514212	1.17e-18	1.49e-17	37.0898	52.9721
AC103740.2	0.514231	0.004437	0.005849	0.324868	0.463987
ZNF48	0.514331	5.54e-10	1.83e-09	5.6686	8.09664
AC012442.1	0.514338	7.48e-06	1.43e-05	0.787289	1.12451
LEO1	0.514388	3.81e-14	2.22e-13	21.7968	31.1342
AL136531.3	0.514411	0.000748	0.001094	0.027699	0.039566
ADAR	0.514415	1.44e-14	8.94e-14	70.2974	100.414
MFSD9	0.514466	3.5e-13	1.77e-12	7.24242	10.3455
ELOVL2-AS1	0.514484	0.004038	0.00535	1.58302	2.26132
DEF8	0.514514	2.65e-12	1.18e-11	10.8368	15.4805
AL357078.2	0.514535	0.005496	0.007156	0.151842	0.216911
AC093726.2	0.514573	3.11e-08	8.2e-08	1.65601	2.36573
SLC22A14	0.514644	0.009401	0.011886	0.038586	0.055126
ODC1-DT	0.514735	4.49e-08	1.16e-07	1.12079	1.60131
SLC10A7	0.514752	8.64e-10	2.79e-09	2.39845	3.42678
ABT1	0.51482	1.95e-15	1.39e-14	26.0386	37.2044
ZFAND4	0.514821	2.45e-11	9.63e-11	2.40066	3.4301
HSPH1	0.514851	4.68e-07	1.05e-06	17.3227	24.7514
GANAB	0.514885	1.17e-15	8.7e-15	186.226	266.094
RPS4X	0.514885	1.71e-08	4.64e-08	628.789	898.464
AC106845.1	0.514949	4.9e-05	8.41e-05	0.150223	0.21466
MIR106B	0.515001	0.006715	0.008653	0.519111	0.741807
UBOX5	0.515007	9.53e-12	3.95e-11	4.28494	6.12319
CSK	0.515024	9.59e-17	8.52e-16	29.3044	41.8765
EEF2	0.515085	8.02e-11	2.95e-10	930.208	1329.34
FDX1P1	0.515168	0.002582	0.003516	0.083244	0.118969
PWWP3A	0.515328	2.8e-13	1.44e-12	6.24599	8.92752
AC005034.5	0.515401	2.72e-07	6.32e-07	0.758615	1.08436
DPY19L4	0.515435	3.78e-11	1.45e-10	6.75974	9.66254
ZC3H11B	0.515558	5.95e-08	1.51e-07	0.073631	0.105258
SLAIN2	0.515559	1.13e-12	5.33e-12	12.9553	18.5202
RTL8C	0.515564	5.98e-05	0.000101	101.993	145.804
CHASERR	0.515588	4.09e-10	1.38e-09	5.93816	8.48905
TRAPPC5	0.515622	3.18e-08	8.37e-08	0.157347	0.224945
KATNAL2	0.515825	1.34e-05	2.48e-05	1.34131	1.91783
UBL7-AS1	0.515843	6.12e-12	2.6e-11	0.959096	1.37134
INVS	0.51585	2.2e-12	9.93e-12	3.5551	5.08321
UBAP1	0.515864	4.77e-14	2.74e-13	41.9486	59.9802
CERK	0.515902	7.87e-11	2.9e-10	26.8836	38.4406
AL008727.1	0.515921	0.003709	0.004941	0.021438	0.030655
GPR37L1	0.515936	0.000203	0.00032	0.234356	0.335111
BRAP	0.515986	1.07e-20	2.09e-19	8.78531	12.5627
TEPSIN	0.515988	1.66e-15	1.2e-14	3.25911	4.66044
CNTLN	0.516031	4.04e-07	9.16e-07	2.96265	4.23663
SCNM1	0.516088	7.43e-11	2.74e-10	19.4326	27.79
PDCD2L	0.516131	2.91e-10	9.94e-10	5.40463	7.72924
SFN	0.516178	0.018464	0.022476	60.1726	86.0565
AC012170.1	0.516248	0.003406	0.00456	0.149393	0.213666
CDPF1	0.516311	1.98e-12	9e-12	12.9422	18.5112
AC104692.1	0.516372	0.039353	0.045976	5.16538	7.38832
SOS1	0.51644	5.75e-15	3.8e-14	8.40704	12.0256
DHX30	0.516449	4.32e-18	4.89e-17	20.8587	29.8369
ANXA2R	0.516457	0.001172	0.001671	2.33079	3.33405
IPO4	0.516465	7.81e-06	1.49e-05	0.066261	0.094782
CRISPLD2	0.516545	0.040675	0.047427	5.27278	7.54285
IFT20	0.516579	1.69e-17	1.72e-16	9.80845	14.0316
ACTB	0.516584	1.23e-11	5.05e-11	1436.9	2055.58
TCTN1	0.516586	1.03e-07	2.54e-07	3.28655	4.70163
AP000357.1	0.516706	0.010651	0.013374	0.071937	0.102919
ZNF777	0.516712	8.06e-14	4.48e-13	13.1446	18.8058
GLRX3	0.516835	4.15e-11	1.59e-10	17.4067	24.9058
AL360181.1	0.516905	0.004794	0.006293	6.46417	9.24946
N4BP1	0.516907	5.14e-17	4.78e-16	7.47559	10.6967
RPL5P17	0.516927	0.002018	0.002787	0.131198	0.187732
CLSTN3	0.516946	2.58e-12	1.15e-11	25.1832	36.0353
AP001324.1	0.516986	0.000411	0.000622	26.4902	37.9065
AL021918.5	0.516994	9.52e-10	3.06e-09	0.213899	0.306083
RASA4CP	0.517005	2.25e-06	4.61e-06	0.74931	1.07225
MALL	0.517017	0.013649	0.016893	0.513456	0.734753
TMCC3	0.51708	1.11e-06	2.37e-06	3.42175	4.89671
GPBP1	0.517099	2.91e-17	2.82e-16	22.7397	32.5421
AP001429.1	0.517101	0.000571	0.000847	0.15745	0.225323
MARCHF6	0.517152	1.1e-13	5.99e-13	22.0333	31.5325
OPCML	0.517188	0.026902	0.032073	0.039156	0.056039
AC125494.2	0.517235	4.81e-06	9.44e-06	0.906658	1.29762
AC117503.3	0.517239	1.02e-06	2.18e-06	0.224544	0.321371
SNRPGP2	0.5173	2.02e-08	5.46e-08	14.3814	20.5837
LSM8	0.517328	5.36e-20	9.19e-19	3.55772	5.09217
HSPA8P5	0.517368	0.000454	0.000682	0.082305	0.117806
TXNIP	0.517427	1.46e-07	3.51e-07	169.255	242.271
B3GAT1-DT	0.517439	0.001978	0.002734	1.14439	1.63809
GNG5	0.517478	1.03e-08	2.89e-08	10.8842	15.5802
MLH1	0.5175	1.62e-14	1e-13	7.52773	10.7757
EEPD1	0.517522	1.69e-09	5.26e-09	13.7099	19.6257
AL022069.1	0.517532	0.002982	0.004029	0.118258	0.169286
ITGB7	0.517551	0.00035	0.000535	0.973651	1.3938
PPP1R3B	0.51763	0.000346	0.000529	31.7305	45.4254
ST3GAL5	0.517667	2.17e-05	3.92e-05	2.11884	3.03342
SLC35E1	0.517683	1.09e-17	1.14e-16	11.5408	16.5225
UBE2H	0.517702	1.01e-11	4.16e-11	35.5613	50.9122
B9D2	0.517719	0.000665	0.000978	4.52653	6.48059
CGRRF1	0.517723	2.87e-14	1.71e-13	3.6441	5.21723
LINC02256	0.51776	0.00248	0.003384	0.263498	0.377259
SLC4A1APP1	0.517805	0.001278	0.001811	0.161537	0.231285
APBB1	0.517813	1.56e-05	2.86e-05	6.09108	8.72111
LDHB	0.517861	0.02481	0.029722	1.51571	2.17024
PARP12	0.517883	2.06e-10	7.18e-10	19.2962	27.6294
PSEN1	0.518003	1.75e-16	1.49e-15	11.5277	16.5073
AK7	0.51819	0.010748	0.01349	0.738258	1.0573
STX17-AS1	0.518249	1.33e-05	2.46e-05	0.358526	0.513487
IFT74	0.5183	8.45e-11	3.1e-10	2.92755	4.19303
HMGB1P24	0.518353	5.53e-05	9.41e-05	0.14839	0.212542
GAPDHP2	0.518383	6.47e-06	1.25e-05	0.159735	0.228796
AC010368.1	0.518405	0.011193	0.014011	0.097667	0.139895
ZSCAN10	0.518517	0.019917	0.024132	0.019287	0.027628
UNKL	0.518558	1.36e-09	4.26e-09	2.60443	3.7309
DPH6	0.518573	1.66e-10	5.86e-10	1.48899	2.13303
AC104212.2	0.51861	0.0361	0.042356	0.087874	0.125886
TMEM250	0.518639	4.6e-12	1.98e-11	26.1533	37.4673
RPL7P18	0.518661	0.003976	0.005273	0.094501	0.135385
MTSS2	0.518672	2.87e-08	7.58e-08	10.3793	14.8697
IGKV3-11	0.518716	0.001949	0.002697	61.7114	88.4126
SCAF1	0.518725	2.19e-17	2.17e-16	38.8068	55.598
IPO5P1	0.518776	7.86e-08	1.96e-07	5.67381	8.12909
UBR2	0.518809	3.81e-13	1.91e-12	11.7445	16.8272
UBE2Q1	0.518811	1.81e-15	1.31e-14	50.7661	72.7363
SPTBN1	0.518943	6.56e-10	2.15e-09	55.1408	79.0115
AC107214.1	0.519027	1.7e-05	3.11e-05	0.344566	0.493758
TUBGCP5	0.519061	2.82e-13	1.45e-12	4.36555	6.25593
DDX3X	0.519069	3.15e-12	1.39e-11	23.3045	33.3961
AP2A2	0.519106	1.19e-18	1.52e-17	18.2336	26.1299
RUFY3	0.519154	1.24e-10	4.46e-10	5.42253	7.77111
USB1	0.519197	8.77e-10	2.83e-09	9.85593	14.1251
CCDC171	0.519269	0.000119	0.000195	0.236262	0.338617
ELMO1	0.519361	1.98e-06	4.09e-06	8.71398	12.4899
DMXL1	0.519362	1.3e-10	4.64e-10	3.58515	5.13868
TMEM170A	0.519404	2.55e-13	1.32e-12	5.43391	7.78876
SH3GL1	0.519409	3.26e-14	1.92e-13	33.9208	48.621
RAB30	0.51944	4.12e-10	1.38e-09	1.69969	2.43633
PER2	0.519453	2.11e-09	6.46e-09	5.28409	7.57427
SFMBT2	0.519503	3.17e-05	5.59e-05	0.953928	1.36742
PIGFP1	0.51951	0.000349	0.000533	0.123088	0.176442
CEMIP2	0.519516	8.88e-09	2.51e-08	30.147	43.215
AC022079.1	0.519536	0.001554	0.002177	0.137199	0.196675
METTL16	0.519549	5.88e-12	2.5e-11	3.93628	5.64269
AC136604.2	0.519637	9.46e-08	2.34e-07	0.323916	0.464364
BLOC1S6	0.519661	3.3e-14	1.94e-13	12.0461	17.2695
AL355472.1	0.519665	0.039127	0.04572	0.474232	0.67987
CCDC153	0.519682	3.33e-05	5.86e-05	0.591258	0.84765
STEAP2-AS1	0.519707	0.019326	0.023465	0.099485	0.142628
PRRC1	0.519707	3.15e-16	2.56e-15	15.0182	21.531
RPS10P2	0.519799	0.003803	0.005059	0.901389	1.29237
KBTBD6	0.519859	3.67e-12	1.6e-11	3.37023	4.83228
NOX4	0.519994	0.000224	0.000352	0.574022	0.823118
AL391069.2	0.520016	0.014846	0.018277	0.160452	0.230083
SEPTIN11	0.520075	2.58e-09	7.83e-09	13.5301	19.4025
ARHGEF35	0.520146	4.16e-06	8.23e-06	2.43894	3.49768
DBNL	0.520166	3.9e-18	4.47e-17	15.3008	21.9432
LINC00649	0.520184	0.000427	0.000645	0.633772	0.908917
KPNA6	0.520352	1.04e-10	3.78e-10	12.1423	17.4158
PDZK1	0.520375	3.29e-06	6.6e-06	66.4507	95.3121
LIPT1	0.52039	6.13e-16	4.76e-15	3.00362	4.30822
COX11	0.520434	2.05e-14	1.24e-13	13.4567	19.3021
PPP1R14BP3	0.520436	2.15e-06	4.41e-06	46.7968	67.1248
AL161787.1	0.520441	0.00888	0.011266	7.08132	10.1574
MAP2K7	0.520447	1.33e-19	2.11e-18	14.1166	20.2489
HSP90AB1	0.520559	4.17e-10	1.4e-09	846.753	1214.68
PHEX	0.52059	2.3e-05	4.14e-05	0.384125	0.551043
VPS4B	0.52064	1.72e-11	6.91e-11	16.3909	23.5142
AC079145.1	0.520657	0.00449	0.005913	0.174741	0.250685
C2CD4D-AS1	0.520678	3.79e-06	7.54e-06	11.0187	15.8078
PODXL	0.520679	8.08e-05	0.000135	14.5409	20.8608
TOX4	0.520681	2.61e-18	3.1e-17	15.1561	21.7434
ARFIP1	0.520787	1.5e-11	6.08e-11	10.9545	15.7168
DOCK3	0.520828	7.05e-16	5.42e-15	0.178368	0.255919
AC021074.1	0.520834	0.001469	0.002064	0.63804	0.915449
TPRN	0.520835	1.15e-05	2.14e-05	15.7458	22.5919
AP000302.1	0.520849	0.024954	0.029882	0.085313	0.122408
ATP6V0E2-AS1	0.520865	0.001862	0.002584	0.697639	1.00098
MAPK6-DT	0.520903	2.19e-05	3.95e-05	0.206509	0.29631
PPP1R3E	0.520945	2.99e-10	1.02e-09	3.19897	4.59018
AL162274.2	0.521029	5.49e-10	1.81e-09	2.03533	2.92065
TNFSF12	0.521051	9.45e-05	0.000156	10.9353	15.6922
TRAF3IP1	0.521151	1.23e-14	7.73e-14	6.6923	9.60412
ARPC5	0.52123	2.61e-14	1.56e-13	35.4104	50.8203
TMEM68	0.521247	3.37e-13	1.71e-12	4.10273	5.88822
AC018645.3	0.521264	2.82e-07	6.53e-07	4.90032	7.033
AL162311.1	0.521268	0.00999	0.012584	0.053855	0.077293
MTCH1	0.521417	2.7e-14	1.61e-13	107.932	154.922
CHTF8	0.521488	1.44e-05	2.65e-05	0.180242	0.258726
PTMAP5	0.521518	4.16e-06	8.23e-06	2.87101	4.12123
TMEM217	0.52159	0.000586	0.000869	0.361102	0.518375
C3orf20	0.521592	1.73e-05	3.16e-05	0.048439	0.069536
TGFB1I1	0.521751	0.002308	0.003162	3.79134	5.44321
P2RY14	0.521772	0.003542	0.004731	0.580466	0.833385
CLINT1	0.521791	1.77e-10	6.22e-10	30.8286	44.2618
POLE3	0.521792	9.82e-14	5.4e-13	35.6238	51.1465
AC105052.2	0.521794	2.37e-08	6.33e-08	0.722613	1.03748
SLC25A12	0.521797	0.000361	0.000551	2.09584	3.00909
R3HDM4	0.52184	4.14e-14	2.39e-13	39.5051	56.7208
ATG12P1	0.521945	0.00518	0.006769	0.141967	0.203848
DUS3L	0.521956	2.42e-15	1.7e-14	11.0199	15.8235
RPA2	0.522042	2.67e-11	1.04e-10	30.7066	44.0943
RARB	0.522088	0.000291	0.000449	1.87613	2.69418
AL121985.1	0.522132	3.27e-05	5.76e-05	0.021496	0.030869
ABCB6	0.522136	4.09e-07	9.27e-07	0.319392	0.458672
ARSG	0.52217	2.87e-06	5.8e-06	1.14432	1.64337
GAR1	0.52223	5.07e-11	1.91e-10	14.2668	20.4896
NUFIP1	0.522263	1.05e-12	4.96e-12	3.7235	5.34772
MORC4	0.522355	9.98e-06	1.88e-05	11.876	17.0575
SLC30A9	0.522403	2.37e-11	9.33e-11	12.7498	18.3132
TCP1	0.522428	4.99e-09	1.46e-08	51.5868	74.0978
ARHGEF35-AS1	0.522452	8.39e-05	0.00014	0.401539	0.576768
PPIAP4	0.52246	0.000122	0.000199	0.80089	1.1504
CYB5B	0.522499	6.75e-07	1.48e-06	18.2701	26.2439
PAXIP1-AS2	0.522517	1.03e-06	2.22e-06	1.45694	2.09283
TSPAN17	0.522646	5.27e-11	1.98e-10	17.493	25.1302
AL160314.2	0.522671	5.73e-06	1.11e-05	0.134187	0.192774
EFCAB14	0.522688	7.94e-12	3.32e-11	10.0304	14.41
ESYT2	0.52269	2.15e-10	7.48e-10	20.9732	30.1308
LRPPRC	0.522694	5.25e-14	3e-13	30.4928	43.8071
TMEM191A	0.52277	0.000698	0.001024	2.45946	3.53354
MSN	0.522783	0.000593	0.000879	78.2141	112.372
EEF1A1P16	0.522796	0.001351	0.001909	0.314067	0.451231
GRB2	0.522815	8.39e-16	6.38e-15	62.2478	89.4348
WDR53	0.523075	9.82e-17	8.71e-16	7.89822	11.3499
AP001330.4	0.523082	4.02e-06	7.98e-06	1.125	1.61665
RPL7P19	0.523278	0.000236	0.000369	0.139712	0.200797
SYMPK	0.523306	9.79e-13	4.65e-12	21.6003	31.0449
CPXM1	0.523441	0.000163	0.00026	3.42248	4.9194
H1-0	0.523511	1.68e-08	4.57e-08	367.93	528.881
GPATCH11	0.523535	7.44e-13	3.59e-12	4.39714	6.32078
DCBLD1	0.523559	4.7e-09	1.38e-08	3.63742	5.22878
H3C13	0.52362	0.001641	0.002293	0.225542	0.32423
RPS25	0.523653	1.39e-11	5.66e-11	515.115	740.525
CYSLTR1	0.52366	0.014475	0.017846	0.486834	0.699871
TMEM9	0.523734	4.31e-11	1.64e-10	69.624	100.096
UTP6	0.523752	4.94e-17	4.59e-16	12.5664	18.0666
GUCA1B	0.523786	0.00072	0.001054	1.15165	1.65576
EHD3	0.523801	0.000144	0.000232	2.85936	4.11101
FASTKD5	0.523818	1.26e-12	5.88e-12	13.2735	19.084
ATXN10	0.523842	2.12e-15	1.5e-14	40.1322	57.7013
TDGF1	0.52385	0.01266	0.015739	7.17463	10.3156
TTC28	0.52393	5.86e-12	2.49e-11	3.08054	4.42941
DDX51	0.523984	4.25e-18	4.82e-17	6.96531	10.0156
AL139021.1	0.524073	0.000653	0.000963	0.37407	0.537916
AC005264.1	0.524116	1.27e-06	2.69e-06	0.062818	0.090336
DHFR	0.524126	1.62e-08	4.42e-08	9.0781	13.0549
ARHGAP17	0.524163	1.24e-11	5.08e-11	7.38662	10.6227
ARHGDIA	0.524186	2.72e-11	1.06e-10	86.849	124.9
GRIK3	0.524217	9.86e-05	0.000162	0.02244	0.032273
SNORA31	0.524294	0.000815	0.001186	0.712359	1.02454
AL442067.3	0.52438	1.29e-05	2.4e-05	0.138728	0.199535
CALCOCO1	0.524383	2.08e-13	1.09e-12	12.3035	17.6964
PPIAP54	0.524452	0.010213	0.012853	0.226334	0.325556
ATXN1-AS1	0.524478	6.99e-05	0.000117	2.25863	3.24885
CLDND1	0.524539	4.62e-16	3.66e-15	11.302	16.2577
SHC3	0.524555	0.001099	0.001573	0.271539	0.390606
NUTM2B	0.524645	0.008602	0.010929	0.078947	0.113572
AC005746.2	0.524649	3.75e-05	6.55e-05	0.197872	0.284655
ARF4	0.524655	2.17e-13	1.13e-12	140.306	201.843
AC090469.1	0.524831	0.000425	0.000642	0.099684	0.143422
TRIM9	0.52486	0.003675	0.004898	0.636059	0.915157
RPSAP20	0.524917	0.039092	0.045681	0.057655	0.082957
EEF1GP5	0.524931	0.002306	0.00316	0.176158	0.253468
FBXO22	0.524956	1.85e-15	1.33e-14	5.77042	8.30301
AP002026.1	0.525108	3.22e-06	6.47e-06	0.606261	0.872435
KRT18P28	0.525134	0.009314	0.011785	0.194798	0.280328
BTBD19	0.525208	0.000536	0.0008	2.26279	3.25648
C3orf38	0.525226	8.28e-17	7.44e-16	7.76883	11.1806
AL118508.3	0.525264	0.000318	0.000489	0.115389	0.166067
PGM3	0.525347	3.43e-09	1.02e-08	10.7592	15.4854
EGLN1	0.525406	2.72e-05	4.85e-05	2.72983	3.92915
FUNDC2	0.525569	2.15e-06	4.41e-06	10.987	15.8157
TMSB10	0.525625	1.6e-05	2.93e-05	2647.06	3810.59
Z84492.1	0.525628	0.015928	0.019533	0.07262	0.104541
CAP2	0.525701	4.92e-07	1.1e-06	22.9904	33.0978
AL158801.4	0.525746	1.02e-07	2.52e-07	1.43211	2.06178
PLEKHM1	0.525752	1.68e-11	6.74e-11	4.2168	6.07085
SHLD1	0.525804	1.11e-05	2.07e-05	2.62699	3.78218
SAG	0.525952	0.009014	0.011426	0.007988	0.011501
ZMYM6	0.52604	8.55e-17	7.65e-16	1.72752	2.48758
LRRC69	0.526046	6.65e-06	1.28e-05	0.416421	0.599637
TPP2	0.526051	1.11e-15	8.34e-15	8.91959	12.844
TBC1D29P	0.526128	0.003944	0.005234	0.026584	0.038282
AL353697.1	0.526131	0.000333	0.00051	0.13562	0.195302
LIPC-AS1	0.526225	0.001392	0.001963	0.062791	0.090429
TSC22D2	0.526241	3.65e-12	1.6e-11	4.82401	6.9474
AC007405.3	0.52631	9.85e-06	1.85e-05	2.25154	3.24276
LRP5L	0.526345	1.51e-12	6.93e-12	2.67777	3.85673
CD59	0.52635	4.06e-05	7.06e-05	41.5572	59.854
DHX16	0.526386	3.05e-16	2.48e-15	25.3862	36.5642
HERC1	0.526582	6.24e-11	2.33e-10	5.12567	7.38359
AC020899.1	0.526597	0.012248	0.015253	0.370546	0.533782
NSL1	0.526631	2.39e-15	1.68e-14	4.58929	6.61116
BPGM	0.526699	2.08e-11	8.24e-11	13.4773	19.4157
AC096642.2	0.526732	1.73e-05	3.16e-05	0.257902	0.371549
LRRC4	0.526743	0.002598	0.003536	0.364206	0.524702
RPS2P5	0.526768	7.9e-06	1.51e-05	57.6679	83.0821
KIF9-AS1	0.526768	6.67e-11	2.48e-10	0.306218	0.441167
HERC4	0.526898	2.73e-15	1.9e-14	4.25834	6.13554
LINC00319	0.526901	0.025562	0.030562	0.025163	0.036255
DTX2	0.526917	4.49e-14	2.59e-13	5.88437	8.47847
AC000123.2	0.527057	3.29e-07	7.55e-07	1.34747	1.94168
LINC00623	0.527093	9.87e-06	1.86e-05	3.21579	4.63403
TNPO3	0.52727	6.41e-13	3.12e-12	23.4521	33.7992
ZNF592	0.527371	3.35e-15	2.3e-14	9.99377	14.404
EGR2	0.527733	5.72e-05	9.73e-05	1.96889	2.83847
AC058791.1	0.527735	0.001494	0.002098	0.03608	0.052015
SNTA1	0.527737	0.001127	0.001611	32.9918	47.5632
LINC01881	0.527801	1.09e-08	3.05e-08	0.877056	1.26448
ETV7	0.527805	0.00023	0.00036	4.28413	6.17657
IL18RAP	0.527809	0.002081	0.002869	0.664231	0.957648
AP001350.2	0.527874	1.4e-08	3.85e-08	0.733802	1.058
DARS2	0.527907	1.25e-12	5.84e-12	10.4566	15.0767
FASTKD3	0.527917	9.61e-15	6.15e-14	6.26277	9.02995
CBWD1	0.527972	8.51e-09	2.41e-08	1.12416	1.62093
HMGB1P8	0.527976	3.6e-05	6.3e-05	0.184055	0.26539
CREB3	0.528	4.01e-12	1.74e-11	48.0254	69.2492
AC010504.1	0.528021	4.03e-08	1.04e-07	0.780656	1.12567
ADGRF3	0.528031	5.97e-09	1.73e-08	0.092644	0.133589
OSGEPL1	0.528064	1.42e-17	1.47e-16	4.25479	6.13537
PFDN1	0.528095	3.06e-11	1.19e-10	26.7159	38.525
RPS4XP2	0.528127	0.000608	0.0009	0.053981	0.077844
PPIP5K2	0.52813	1.67e-11	6.7e-11	3.49312	5.03728
UBN1	0.528188	7.94e-14	4.42e-13	10.3559	14.9344
ENOX2	0.528227	3.8e-11	1.46e-10	5.52125	7.9625
SCAMP1-AS1	0.528272	3.22e-13	1.64e-12	2.23548	3.22401
S1PR2	0.528289	2.05e-06	4.22e-06	9.37333	13.5184
NT5E	0.528333	0.000711	0.001042	25.4571	36.7158
PTGER2	0.528494	0.00446	0.005876	0.970783	1.40028
BX537318.1	0.528549	1.43e-07	3.45e-07	3.35344	4.83727
FAM122C	0.528607	1.88e-10	6.61e-10	0.547706	0.790086
TMEM41B	0.528817	2.7e-18	3.2e-17	25.2418	36.4175
LINC-PINT	0.528824	1.23e-05	2.28e-05	0.628055	0.906128
TRMT61B	0.528836	1.9e-10	6.65e-10	6.61801	9.54823
AC023590.1	0.528841	0.013959	0.01725	0.066997	0.096662
WASHC2C	0.528879	6.95e-14	3.9e-13	10.2359	14.7684
LINC02680	0.528894	0.003978	0.005276	0.024955	0.036005
CCER2	0.528903	2.66e-05	4.74e-05	1.07537	1.55158
NIPAL2	0.528936	1.74e-06	3.62e-06	13.2956	19.1837
POMZP3	0.528961	1.79e-07	4.25e-07	2.75968	3.98191
KCTD9P4	0.528978	0.033793	0.039793	0.152462	0.219989
SNHG30	0.528986	4.26e-08	1.1e-07	7.40911	10.6907
LIG3	0.529001	3.69e-14	2.15e-13	3.68001	5.30999
FKBP3	0.529201	2.71e-16	2.23e-15	27.0262	39.0023
AFF2	0.529285	0.00136	0.001921	0.330095	0.476397
DHX33	0.529312	9.72e-15	6.22e-14	5.98825	8.64249
JUP	0.529584	2.74e-09	8.3e-09	83.9444	121.175
HTR7P1	0.529587	7.59e-09	2.16e-08	1.16636	1.68366
EEF1A1P9	0.529589	1.79e-05	3.26e-05	3.30896	4.77654
LMAN2L	0.529603	3.52e-13	1.78e-12	20.1736	29.1212
PPIG	0.529655	2.62e-16	2.16e-15	10.3498	14.9408
HOMEZ	0.529712	3.38e-15	2.31e-14	4.85868	7.01419
UBE2D3P1	0.529735	0.000208	0.000328	0.492457	0.710943
UBXN4	0.52974	1.27e-13	6.85e-13	52.7753	76.19
NLK	0.529762	1.64e-16	1.4e-15	10.1121	14.5988
AC009509.4	0.529861	0.003843	0.005108	0.670528	0.968102
EXOSC9	0.529986	1.55e-15	1.13e-14	7.34881	10.6111
SNRPD2	0.530027	1.88e-05	3.41e-05	183.282	264.651
CACYBP	0.530231	3.96e-11	1.51e-10	29.5223	42.6349
GOLPH3	0.530304	5.78e-14	3.28e-13	108.739	157.045
ZDHHC16	0.530328	6.9e-14	3.87e-13	21.4935	31.0422
AC073861.1	0.53037	0.00017	0.000271	17.2416	24.902
ABCE1	0.530406	9.26e-13	4.41e-12	12.3337	17.814
AC020910.6	0.530426	2.25e-06	4.61e-06	1.26309	1.82435
SEC14L1	0.530471	1.74e-08	4.74e-08	8.46794	12.2311
ZBTB17	0.53048	1.62e-16	1.38e-15	10.3487	14.9478
IFFO1	0.530519	1.1e-12	5.18e-12	8.65435	12.5008
CFAP58	0.530551	0.000736	0.001077	0.067684	0.097769
LRP2BP	0.530571	3.05e-06	6.15e-06	0.319978	0.462208
ASB7	0.530585	3.3e-16	2.68e-15	5.04267	7.28421
BRWD1	0.530654	8.94e-12	3.71e-11	4.13645	5.97544
FOXRED2	0.530684	1.65e-08	4.49e-08	16.9426	24.4755
MICU3	0.530816	0.000125	0.000203	2.12243	3.06638
RALGPS2	0.530827	4.59e-08	1.18e-07	14.8039	21.388
VDAC1P2	0.53098	4.47e-05	7.71e-05	0.249241	0.360131
MOB3C	0.531011	8.36e-13	4.01e-12	3.92895	5.6771
SYNGR2	0.531074	3.35e-08	8.77e-08	76.7473	110.9
AL033523.1	0.53115	0.026178	0.031251	0.069305	0.100151
AL354893.1	0.531154	0.00334	0.004477	0.477917	0.690631
RPL6	0.531184	2.83e-11	1.1e-10	261.916	378.499
SERPINB6	0.531265	2.87e-07	6.63e-07	12.2938	17.7669
OPA3	0.531283	7.49e-13	3.61e-12	7.07503	10.2249
GEMIN4	0.531329	4.06e-12	1.76e-11	5.40217	7.80754
POT1	0.53137	8.13e-11	2.99e-10	3.74032	5.40588
YWHAB	0.531473	5.33e-14	3.04e-13	49.4971	71.5434
AC002310.2	0.531476	0.018545	0.022567	0.020998	0.03035
CALML6	0.53153	0.004209	0.005564	0.541905	0.783303
PPP1R36	0.531564	0.007921	0.010106	0.247458	0.357699
MIEF1	0.53157	2.43e-16	2.02e-15	13.9871	20.2183
PNO1	0.531597	1.9e-15	1.36e-14	13.4452	19.4354
EIF4A2P4	0.531853	0.007616	0.009739	0.063047	0.091152
EEF1A1	0.531853	4.26e-09	1.26e-08	599.238	866.369
SNAP23	0.531946	9.96e-12	4.11e-11	2.46604	3.56559
ACTG1P23	0.531947	0.002063	0.002846	0.225566	0.326141
OTUB1	0.532045	1.54e-16	1.32e-15	25.0352	36.2003
RBBP7	0.532064	4.43e-15	2.97e-14	25.8082	37.3185
MAPK14	0.532171	7.27e-14	4.06e-13	21.9069	31.6797
SGPP1	0.532189	1.84e-08	4.97e-08	14.3813	20.7971
SH2B1	0.53226	1.59e-15	1.15e-14	12.3424	17.8495
TP53I13	0.532268	4.89e-07	1.1e-06	16.1873	23.41
DDB1	0.53233	2.48e-17	2.43e-16	32.0424	46.3417
LHB	0.532363	0.018293	0.022287	0.277653	0.401569
GRN	0.532369	6.99e-07	1.53e-06	237.571	343.599
GNL2	0.532372	6.7e-14	3.77e-13	18.6371	26.955
SWT1	0.532392	4.11e-14	2.38e-13	3.05143	4.41336
RPL27AP	0.532496	0.009352	0.011829	0.129501	0.187314
TEX261	0.53253	2.68e-20	4.9e-19	38.4584	55.6286
DARS-AS1	0.532532	0.000176	0.00028	0.272654	0.394384
KRIT1	0.532538	1.28e-21	3.13e-20	1.53976	2.22722
ACRBP	0.532579	1.05e-05	1.97e-05	1.32337	1.91427
RAB9A	0.532625	1.1e-08	3.06e-08	18.0766	26.1488
PRICKLE3	0.532676	6.75e-14	3.79e-13	3.1179	4.51038
FAM104A	0.532723	4.06e-12	1.76e-11	6.74893	9.76339
TLE1	0.532749	1.27e-09	4.02e-09	40.1966	58.1518
LIG4	0.532801	2.17e-11	8.61e-11	5.09873	7.37652
UTP14A	0.532831	4.76e-12	2.05e-11	9.73118	14.0787
APH1A	0.532836	8.83e-17	7.89e-16	143.769	208
PAX9	0.532887	0.00291	0.003936	0.061712	0.089287
USP19	0.532888	1.76e-15	1.27e-14	21.8295	31.5834
CLP1	0.532894	1.78e-17	1.8e-16	10.5848	15.3144
GOLT1B	0.532912	7.47e-15	4.85e-14	21.8285	31.5825
ABHD17A	0.53293	9.25e-22	2.34e-20	8.41065	12.1691
ANP32A	0.532964	4.47e-18	5.05e-17	31.3371	45.3417
LUC7L2	0.532966	9.97e-22	2.5e-20	7.19251	10.4068
ANKRD42	0.533045	9.35e-10	3e-09	1.60021	2.31547
CCDC87	0.533111	0.000134	0.000216	0.460339	0.666132
RNF43	0.533116	0.000608	0.0009	6.22655	9.01014
NOM1	0.533129	1.84e-14	1.13e-13	4.6558	6.73723
STAMBP	0.533179	3.55e-18	4.1e-17	8.81184	12.7517
FBXO3	0.533186	6.58e-15	4.31e-14	5.97972	8.65339
HEXIM2	0.533199	1.04e-10	3.76e-10	1.7328	2.50759
UBE2L5	0.533248	1.65e-06	3.44e-06	0.069292	0.100279
MRPL3	0.533364	3.94e-18	4.5e-17	37.0159	53.5732
LINC01936	0.533423	0.000175	0.000279	0.07829	0.113313
DLEC1	0.533446	0.000961	0.001387	0.192506	0.27863
CPSF2	0.533448	2.65e-16	2.18e-15	5.99484	8.67684
LRRC55	0.533549	0.000149	0.00024	0.147694	0.213784
NELFCD	0.533553	7.44e-13	3.59e-12	31.605	45.748
CRYZL1	0.53356	1.01e-16	8.93e-16	4.00171	5.79246
AC005730.3	0.5336	0.020205	0.024455	0.24084	0.348625
ILKAP	0.533622	2.34e-19	3.52e-18	9.68989	14.0267
AL356968.2	0.533633	1.54e-06	3.22e-06	0.368941	0.534068
AC103858.3	0.53365	0.00049	0.000734	0.081386	0.117813
LINC00997	0.533657	1.37e-08	3.77e-08	2.37779	3.44208
PROX1-AS1	0.533807	5.9e-05	0.0001	1.65881	2.40153
AP000640.2	0.533815	0.000893	0.001294	0.10216	0.147903
BRD7P2	0.533828	2.2e-05	3.96e-05	0.165316	0.239339
PDXK	0.533876	1.49e-09	4.66e-09	17.5745	25.4447
AC104170.1	0.533958	0.000235	0.000367	0.121857	0.176436
ACTG1P17	0.533979	3.18e-06	6.39e-06	0.149939	0.2171
IL4R	0.534115	5.12e-07	1.15e-06	25.4537	36.8584
C1orf162	0.534151	0.009463	0.011959	6.10875	8.84602
FILIP1L	0.534161	0.000603	0.000892	5.32088	7.70516
TMEM200B	0.53417	0.001965	0.002719	5.45374	7.89761
TRIB2	0.534209	3.2e-06	6.42e-06	15.1345	21.917
AC005670.3	0.534221	1.11e-11	4.57e-11	0.683535	0.989868
STAT5A	0.534254	5.38e-06	1.05e-05	6.47332	9.37461
RCN3	0.534278	4.03e-08	1.04e-07	18.1089	26.2256
ELDR	0.534343	4.47e-05	7.72e-05	0.03039	0.044014
ORC4	0.534356	1.97e-14	1.2e-13	4.70004	6.80704
ZC3H15	0.534358	3.52e-17	3.35e-16	38.2263	55.363
GRAP2	0.534416	0.003851	0.005117	0.963957	1.39615
RPSAP76	0.534424	0.027237	0.032453	0.060154	0.087125
ACOT9	0.534459	4.91e-11	1.85e-10	8.35934	12.1077
NUCKS1	0.534471	9.26e-13	4.41e-12	118.914	172.236
NSA2P2	0.534507	0.009267	0.011729	0.048389	0.070089
RN7SL76P	0.53452	0.019608	0.023786	0.137725	0.19949
SNRPEP4	0.534528	1.46e-05	2.69e-05	1.94006	2.81011
FTSJ1	0.534598	1.49e-12	6.87e-12	16.4696	23.8568
ST6GALNAC4	0.534605	0.000185	0.000294	7.49463	10.8563
CREBBP	0.534628	4.07e-10	1.37e-09	9.06194	13.1268
LRRC40	0.534644	1.54e-10	5.46e-10	9.55822	13.8459
LTV1	0.534678	6.33e-12	2.68e-11	13.5795	19.6716
EEF1A1P1	0.534699	0.030631	0.036258	0.381046	0.551999
AC099560.2	0.534728	0.001189	0.001692	3.36913	4.88075
GLIPR1L1	0.534776	0.000357	0.000545	0.201556	0.291998
AC139887.2	0.534785	5.46e-10	1.8e-09	1.34513	1.94872
INO80E	0.534788	8.87e-14	4.9e-13	10.8081	15.6581
ATP7B	0.535016	7.11e-05	0.000119	3.01061	4.36225
ARHGEF7	0.535064	9.37e-16	7.09e-15	6.90008	9.99826
RPS10P7	0.535151	0.028726	0.034107	1.42351	2.0628
VPS52	0.53517	9.1e-10	2.93e-09	16.0063	23.1949
AC005740.4	0.535183	3.68e-05	6.43e-05	0.290701	0.421263
AC090948.3	0.535262	8.85e-07	1.92e-06	1.04105	1.5087
KLHDC1	0.535328	2.22e-06	4.54e-06	1.10724	1.60469
AC027307.1	0.535363	0.003593	0.004795	0.173369	0.251265
AL451042.2	0.535427	0.00418	0.005528	0.465771	0.675075
RNF19B	0.535476	8.92e-06	1.69e-05	13.0765	18.9533
HBEGF	0.535492	0.000272	0.000421	5.28781	7.66434
TBC1D22A	0.535503	5.84e-15	3.85e-14	15.3666	22.2731
TRNT1	0.535503	1.22e-16	1.07e-15	3.99068	5.78428
RPL9P3	0.535551	0.001304	0.001847	0.209508	0.30368
APLP2	0.535624	1.93e-11	7.7e-11	180.411	261.518
OAZ3	0.535728	2.57e-08	6.85e-08	0.367351	0.532538
RNF115	0.535742	1.56e-15	1.13e-14	9.02828	13.0882
TLE1P1	0.535777	1.99e-05	3.6e-05	4.8768	7.07001
KDELR3	0.535779	1.81e-05	3.3e-05	30.7008	44.5077
CACNA1G-AS1	0.535796	0.017775	0.02169	0.051839	0.075154
NHLRC4	0.535813	9.02e-05	0.000149	0.303618	0.440173
AMOT	0.535826	0.026806	0.031969	1.86481	2.70354
GNAI1	0.535881	3.55e-09	1.06e-08	3.29153	4.77215
ZNF280D	0.535883	1.23e-14	7.71e-14	2.58742	3.75132
ZFYVE27	0.53595	8.77e-15	5.64e-14	16.9471	24.5715
ALPK1	0.535979	0.00021	0.000331	1.58803	2.30252
AC008462.1	0.536088	0.023585	0.02833	0.062066	0.089997
EEF1A1P38	0.536181	4.32e-05	7.48e-05	0.250861	0.36378
SPATA6	0.5362	0.001253	0.001778	1.02638	1.48841
DNAJC4	0.536267	6.98e-13	3.38e-12	19.6376	28.4787
BANF1P3	0.536296	2.64e-05	4.7e-05	1.2869	1.86632
AL158063.1	0.536298	3.32e-05	5.83e-05	0.44823	0.650044
TARS1	0.53635	1.3e-09	4.1e-09	41.9941	60.904
AP001189.3	0.536499	0.012219	0.01522	0.906901	1.31541
SGCB	0.536562	0.001003	0.001443	8.28754	12.0212
ZNF346	0.536562	1.54e-15	1.12e-14	3.02142	4.3826
YARS2	0.536696	5.14e-13	2.53e-12	10.23	14.8401
CHN2	0.536791	0.000205	0.000323	0.120289	0.174509
DPCD	0.536953	0.000691	0.001014	9.64854	13.9991
HIKESHI	0.536992	1.1e-14	6.98e-14	11.1402	16.1638
TMEM107	0.53703	6.02e-08	1.52e-07	2.09631	3.04171
NUDT4	0.537081	4.48e-11	1.7e-10	5.7292	8.31326
NCOR1	0.537113	2.83e-10	9.68e-10	8.22053	11.9285
CNP	0.537183	5.25e-14	3e-13	28.9946	42.0751
STAU1	0.537227	2.96e-14	1.75e-13	102.927	149.366
AC007638.2	0.53723	0.000783	0.001142	0.932375	1.35305
GGT2	0.537245	0.014408	0.017769	0.059921	0.086957
SYNE4	0.537248	0.001988	0.002747	9.26983	13.4524
IPO8	0.537311	5.98e-15	3.94e-14	13.0199	18.8953
UCKL1	0.537406	5.75e-15	3.8e-14	24.1414	35.0378
ERN1	0.537415	1e-08	2.81e-08	8.61579	12.5047
AARS2	0.537457	3.74e-15	2.54e-14	10.7025	15.5337
SRP72	0.537506	8.04e-13	3.86e-12	26.2634	38.1203
UNC50	0.537522	7.17e-20	1.2e-18	24.5198	35.59
CDC42EP4	0.537569	9.93e-07	2.14e-06	31.3225	45.4653
TMEM234	0.537576	9.04e-09	2.55e-08	2.82972	4.10743
NRIP1	0.537585	3.68e-08	9.6e-08	6.61669	9.6044
AL136985.2	0.537661	0.000621	0.000918	0.230406	0.334461
AC023024.2	0.537685	0.000206	0.000325	3.81692	5.5408
AC079880.1	0.537816	0.000158	0.000254	0.069393	0.100743
LANCL1	0.537847	4.44e-14	2.56e-13	19.9363	28.9437
ZNF581	0.537851	1.6e-10	5.66e-10	19.2462	27.9418
CFAP36	0.537891	1.61e-06	3.37e-06	11.3778	16.5188
LINC01389	0.537978	7.58e-06	1.45e-05	2.11198	3.06647
EEF1A1P2	0.537987	0.03302	0.038928	0.032641	0.047394
SLC41A3	0.538122	8.39e-16	6.38e-15	12.7769	18.5532
AC096887.1	0.538145	7.15e-12	3e-11	0.239019	0.34708
ZSWIM3	0.538195	1.35e-16	1.17e-15	2.9514	4.28588
AL118523.1	0.538201	0.003193	0.004293	0.293401	0.426066
BOD1	0.538236	2.62e-15	1.83e-14	29.6353	43.0362
TMEM14DP	0.53832	7.95e-05	0.000133	0.61787	0.897321
GANC	0.538321	1.05e-08	2.94e-08	2.22059	3.22492
FABP5P3	0.53846	0.00285	0.003862	0.031059	0.04511
PRPF19	0.538501	3.43e-20	6.14e-19	86.2259	125.24
GTF2F1	0.538505	7.05e-16	5.42e-15	46.0845	66.9362
VAMP4	0.538539	9.12e-16	6.9e-15	7.03199	10.214
AL049780.3	0.538585	1.79e-05	3.26e-05	0.091719	0.133226
LINC00933	0.53864	2.41e-05	4.32e-05	0.232745	0.338086
AP006621.6	0.538741	0.000161	0.000258	0.370811	0.538679
MYH7B	0.538893	8.91e-07	1.93e-06	2.01542	2.92812
CLIP4	0.538895	0.007566	0.009678	3.25864	4.73435
AC116447.1	0.538945	2.18e-07	5.12e-07	0.357926	0.520034
AP001505.1	0.539012	6.65e-07	1.46e-06	8.72736	12.6806
UCN2	0.539093	0.002699	0.003667	0.141204	0.205178
NELFE	0.539108	4.69e-11	1.78e-10	65.0556	94.5307
FAF2	0.53914	1.92e-18	2.35e-17	19.7146	28.6475
WDR20	0.539153	3.22e-19	4.67e-18	3.82833	5.56301
MAN1A2	0.539257	2.11e-09	6.48e-09	10.9431	15.9028
DUSP6	0.539298	3.9e-08	1.01e-07	35.7264	51.9199
AC011005.1	0.539524	1.06e-05	1.99e-05	0.340662	0.49515
THAP12P7	0.53953	0.000634	0.000936	0.081324	0.118205
PATJ	0.539586	2.43e-07	5.67e-07	7.00678	10.1847
CCDC9	0.539634	9.19e-16	6.95e-15	13.7818	20.0333
SNHG16	0.539654	1.22e-08	3.39e-08	6.11556	8.88972
AC087239.1	0.539681	9.49e-07	2.05e-06	0.669114	0.972658
LINC01226	0.53973	0.000679	0.000998	0.245981	0.357583
SRSF3P1	0.539791	0.003118	0.004199	0.172759	0.25115
DAXX	0.539817	1.19e-15	8.82e-15	37.5524	54.5933
CDC42BPA	0.539847	4.62e-09	1.36e-08	8.70767	12.6594
PUDP	0.539869	3.54e-10	1.2e-09	9.12073	13.2601
AC027097.2	0.539951	0.000105	0.000172	0.330545	0.480587
MTAP	0.539975	2.67e-12	1.19e-11	3.2	4.65264
C19orf44	0.540018	2.67e-10	9.18e-10	2.10838	3.06556
L3HYPDH	0.54009	5.54e-09	1.61e-08	5.63504	8.19371
UBE3A	0.540106	1.69e-14	1.04e-13	5.18799	7.54375
SEMA6B	0.540183	0.000206	0.000325	5.20236	7.56504
RALB	0.540199	6.07e-08	1.54e-07	25.38	36.907
PCNX1	0.540207	2.48e-11	9.75e-11	4.71452	6.85577
TBCEL-TECTA	0.540235	0.000142	0.000229	0.091056	0.132415
SLC9A6	0.540349	1.95e-12	8.85e-12	3.05158	4.43799
TIMM23B	0.540366	4.32e-13	2.15e-12	1.36537	1.98571
AC021218.1	0.540396	0.012574	0.01564	2.07179	3.01315
CDV3	0.54059	2.66e-14	1.59e-13	66.3035	96.4429
RNF168	0.540632	1.3e-13	7.02e-13	6.16986	8.97474
ZSCAN32	0.540671	1.5e-14	9.32e-14	4.43855	6.45653
PHF14	0.540671	2.03e-16	1.71e-15	5.68238	8.26586
POFUT1	0.540691	1.28e-13	6.9e-13	31.6848	46.0909
DNMBP	0.540724	2.21e-07	5.2e-07	5.53384	8.05009
SETMAR	0.540745	4.39e-11	1.67e-10	5.90655	8.5924
AL158196.1	0.540773	6.48e-06	1.25e-05	0.260317	0.378697
LRATD1	0.540778	0.000132	0.000213	0.969108	1.40982
DOK2	0.540781	0.029117	0.034542	7.58669	11.0368
AC145285.2	0.540795	4.65e-07	1.05e-06	0.667375	0.97088
TPI1P3	0.540804	0.025509	0.030504	0.076842	0.111789
RPP30	0.540805	1.3e-14	8.16e-14	8.83998	12.8603
YME1L1	0.540881	4.2e-14	2.43e-13	33.421	48.6228
CIRBP	0.540956	3.36e-14	1.97e-13	53.5394	77.8965
SETBP1-DT	0.54096	1.15e-06	2.45e-06	0.687832	1.00075
RPS27AP5	0.541112	0.000276	0.000427	0.542882	0.789945
AL031283.1	0.541127	0.000211	0.000333	0.045445	0.066128
NXT1	0.541148	1.85e-11	7.41e-11	24.9224	36.2653
LYPD5	0.54118	0.000695	0.001019	0.32141	0.467704
NATD1	0.541378	1.07e-08	2.98e-08	5.59686	8.14546
ESS2	0.541424	5.38e-17	4.98e-16	5.93748	8.64146
HSP90AB4P	0.541439	9.79e-05	0.000161	0.063955	0.093082
FRG1JP	0.541486	0.002001	0.002763	1.98962	2.89583
TYROBP	0.54149	0.02862	0.033992	87.1238	126.806
CNRIP1	0.541584	0.040485	0.047222	2.24633	3.26969
AC092171.5	0.541591	4.84e-07	1.09e-06	2.96644	4.31788
AC090164.3	0.541622	0.000928	0.001342	0.389346	0.566735
TLN1	0.541637	3.21e-11	1.24e-10	54.2371	78.9488
CD226	0.541649	0.007533	0.009637	0.268723	0.391163
LPAR4	0.541736	0.002488	0.003395	0.048687	0.070875
PDE6D	0.541753	1.22e-16	1.07e-15	10.5954	15.4241
LINC01678	0.541809	0.013736	0.016992	0.14206	0.20681
AL590282.2	0.541817	0.001274	0.001806	0.081767	0.119036
TECTA	0.54189	1.55e-08	4.25e-08	0.213838	0.311322
CD72	0.541899	0.034505	0.040587	2.67265	3.89108
AC097376.3	0.541966	2.78e-11	1.08e-10	0.713977	1.03952
RSL24D1	0.542	3.03e-17	2.92e-16	18.2995	26.6439
MLXIP	0.542087	3.4e-12	1.49e-11	7.61084	11.082
PRR14	0.542121	1.39e-17	1.43e-16	15.39	22.4095
ATP8A1	0.542255	1.35e-07	3.27e-07	1.08951	1.58659
C20orf27	0.542259	5.41e-09	1.57e-08	39.5456	57.5883
MAGED2	0.542282	6.08e-12	2.58e-11	101.217	147.399
TRPV3	0.542314	0.025182	0.030133	0.207478	0.302151
TARBP2	0.542406	9e-13	4.3e-12	12.8401	18.7004
TRABD	0.542419	6.04e-14	3.42e-13	22.5513	32.8441
NSRP1	0.542444	7.06e-14	3.95e-13	9.15697	13.3366
AL049828.1	0.542444	7.97e-06	1.52e-05	0.027039	0.039381
AC019186.1	0.542484	5.78e-06	1.12e-05	0.726482	1.05811
ZNF181	0.542577	1.55e-12	7.12e-12	3.59666	5.23879
SEC11A	0.542579	1.38e-18	1.74e-17	37.661	54.856
VPS53	0.54276	6.54e-16	5.05e-15	2.45805	3.58078
AC111197.1	0.542772	0.002633	0.003581	0.197995	0.288433
RPL12P33	0.542793	0.008602	0.010929	0.169742	0.247279
SOCS6	0.542876	4.94e-11	1.86e-10	10.993	16.0154
TAMM41	0.542996	9.37e-16	7.09e-15	1.91546	2.79081
SLC9A8	0.543073	3.32e-13	1.69e-12	8.12965	11.8455
PAIP1	0.54309	1.33e-13	7.14e-13	28.1564	41.0265
TMEM8B	0.54311	3.31e-10	1.12e-09	1.99945	2.91342
RN7SL128P	0.543113	6.75e-05	0.000114	0.236561	0.344696
FTLP14	0.543153	0.003809	0.005066	5.31458	7.74416
RAB29	0.543154	8.02e-11	2.95e-10	23.7293	34.5772
ERGIC2	0.543327	3.73e-12	1.63e-11	9.76183	14.2262
KRT8P24	0.54334	0.012858	0.015972	0.12902	0.188026
UGGT2	0.543365	9e-12	3.74e-11	4.21053	6.13629
PDCD2	0.54344	3.7e-13	1.86e-12	10.3138	15.0318
CNBD2	0.543468	4.82e-08	1.24e-07	0.141916	0.206839
EIF1AD	0.543501	1.78e-22	5.41e-21	13.8095	20.1274
XAF1	0.543544	5.99e-05	0.000101	1.95476	2.84916
CBWD4P	0.543581	5.69e-05	9.67e-05	0.786062	1.14575
GNAZ	0.543595	0.001046	0.0015	6.98273	10.178
UTP18	0.543599	6.73e-13	3.27e-12	23.1971	33.8121
AL358472.5	0.543643	2.3e-08	6.16e-08	0.537199	0.783047
CAPN7	0.54368	1.93e-14	1.17e-13	9.45887	13.7881
DBH-AS1	0.543701	0.015809	0.019393	15.8515	23.1069
AL139339.1	0.5438	0.038046	0.044515	0.12836	0.187125
METAP2	0.543814	3.06e-17	2.95e-16	32.4433	47.2966
TAF11	0.543821	5.83e-16	4.54e-15	25.6034	37.3253
AL691447.2	0.543831	0.000423	0.00064	0.084916	0.123793
CATSPERE	0.543869	2.95e-08	7.78e-08	0.443345	0.646342
RPL23AP82	0.543922	4.88e-08	1.25e-07	2.2411	3.26736
ERLEC1	0.543929	3.52e-16	2.83e-15	51.4505	75.0117
DPH2	0.544038	1.57e-10	5.56e-10	15.5883	22.7285
AC002350.2	0.544187	1.24e-08	3.45e-08	0.442205	0.644823
AL590867.2	0.544228	3.45e-06	6.9e-06	21.3945	31.1983
RPL4P4	0.544274	7.28e-05	0.000122	4.26363	6.21759
RTN3	0.544384	1.05e-16	9.24e-16	55.7487	81.3037
CHRAC1	0.544386	9.6e-12	3.97e-11	19.9706	29.1251
CLK4	0.544523	6.31e-15	4.14e-14	3.41344	4.97864
CCDC59	0.544537	5.12e-18	5.72e-17	9.9458	14.5065
AC022916.1	0.544552	0.000692	0.001016	0.713104	1.04011
NOL11	0.544577	4.7e-16	3.71e-15	19.7851	28.8584
AC006978.1	0.544583	1.2e-12	5.61e-12	9.60517	14.0101
AC002550.2	0.544622	2.27e-07	5.31e-07	0.954281	1.39195
PRKCZ	0.544643	1.23e-07	2.99e-07	2.3208	3.38526
SLC17A5	0.544659	2.67e-08	7.08e-08	28.2593	41.2211
NKAIN2	0.544676	0.006282	0.008118	0.346874	0.505983
LCMT2	0.544684	1.05e-10	3.81e-10	2.69746	3.93479
AC092652.2	0.544686	0.003594	0.004796	0.062883	0.091727
NHLRC3	0.544688	2.25e-11	8.9e-11	7.44637	10.862
ATG16L1	0.54474	2.87e-20	5.21e-19	8.71231	12.7091
AL645933.2	0.544799	4.07e-05	7.07e-05	3.62212	5.28402
AC021148.2	0.544826	2.17e-07	5.1e-07	0.800755	1.16818
PDIA6	0.544833	2.81e-09	8.48e-09	97.0251	141.545
AC010735.2	0.545207	0.004202	0.005556	1.39755	2.03935
Z69706.1	0.54522	2.27e-05	4.08e-05	1.05376	1.53769
GPN2	0.545265	3.91e-16	3.13e-15	9.49363	13.8539
METTL5	0.545331	4.25e-17	4.02e-16	15.1465	22.1041
AC041005.1	0.545342	2.09e-05	3.78e-05	0.037049	0.054069
TMSB10P1	0.545371	0.001251	0.001775	1.07614	1.57051
EFCAB6	0.545429	0.004372	0.005767	0.162359	0.236956
AP005018.2	0.545464	0.013579	0.016813	1.10455	1.61207
TRAM2	0.545464	4.51e-08	1.16e-07	8.70397	12.7034
AC016546.1	0.545467	0.010978	0.013761	0.203691	0.297285
AC018523.1	0.545512	0.02692	0.032091	0.112402	0.164054
LSMEM2	0.545521	7.54e-05	0.000126	0.071434	0.104261
GPALPP1	0.545531	1.73e-15	1.25e-14	2.80243	4.0903
STAM2	0.545607	1.35e-15	9.89e-15	7.3192	10.6834
KCTD20	0.545731	2.38e-13	1.23e-12	28.9704	42.2898
ZDHHC4	0.545808	8.34e-11	3.06e-10	12.6044	18.4004
BZW1P2	0.545937	5.79e-05	9.84e-05	0.697705	1.01863
MED24	0.545966	1.02e-14	6.48e-14	21.4316	31.29
RTF1	0.546003	3.29e-18	3.83e-17	16.3315	23.8445
URI1	0.546013	4.29e-17	4.05e-16	19.557	28.5542
AC136475.1	0.546029	4.82e-08	1.24e-07	1.13517	1.65742
TUBG1	0.546069	2.33e-10	8.08e-10	32.4925	47.4424
EEF1AKMT2	0.546085	3.71e-11	1.42e-10	1.67834	2.45057
EFTUD2	0.546098	4.55e-13	2.26e-12	18.0823	26.4026
H3C6	0.546132	0.019958	0.024175	3.26371	4.76556
XIAP	0.546195	2.14e-12	9.67e-12	12.3148	17.9824
PPIAP21	0.546322	0.000718	0.001052	0.662053	0.966834
TIAL1	0.546368	3.31e-20	5.93e-19	15.4688	22.5907
AMZ2P1	0.54639	1.68e-12	7.68e-12	3.06562	4.47712
CHCHD6	0.546426	8.34e-09	2.37e-08	6.76148	9.87489
TMEM138	0.546454	6.68e-20	1.13e-18	7.71824	11.2724
AC087385.2	0.546483	0.016493	0.020192	0.330739	0.483051
CHMP4B	0.546496	2.73e-12	1.22e-11	143.515	209.609
ARFGEF1	0.546515	2.35e-11	9.27e-11	8.71557	12.7296
TBC1D19	0.546523	9.3e-09	2.62e-08	1.48406	2.16757
METTL18	0.546523	7.64e-15	4.96e-14	9.29521	13.5762
SRSF4	0.546526	8.19e-16	6.24e-15	15.5136	22.6587
LRATD2	0.546649	0.001637	0.002288	11.3844	16.629
AC011747.1	0.546715	0.026901	0.032073	0.433806	0.633685
AC022966.2	0.546827	3.15e-07	7.24e-07	0.210847	0.30802
ETF1P1	0.546853	2.07e-07	4.87e-07	0.12662	0.184979
MOGS	0.546888	6.1e-20	1.03e-18	46.9797	68.6341
ZNF526	0.546892	2.53e-17	2.47e-16	4.45007	6.50127
GNS	0.54694	6.62e-10	2.16e-09	66.7314	97.4935
DPY19L1	0.546998	6.68e-07	1.47e-06	10.1551	14.837
KXD1	0.547079	6.65e-19	8.99e-18	13.5103	19.7403
NEK9	0.5471	2.21e-17	2.19e-16	10.3384	15.1059
CNEP1R1	0.547136	4.77e-12	2.05e-11	3.99129	5.832
PPM1G	0.547174	2.05e-13	1.07e-12	56.995	83.2823
TSN	0.54718	4.46e-15	3e-14	34.2336	50.023
MGLL	0.547188	5.07e-05	8.68e-05	25.1321	36.7239
FAM120AOS	0.547318	3.04e-19	4.44e-18	7.29453	10.66
ZBED3-AS1	0.547346	1.31e-05	2.43e-05	0.138034	0.201723
RPL7AP60	0.547399	0.007015	0.009017	0.152146	0.222353
FBXL4	0.547425	7.31e-13	3.53e-12	6.12278	8.94829
PIGY-DT	0.547497	0.005531	0.007198	0.114753	0.167717
USF3	0.547538	7.87e-11	2.9e-10	4.30021	6.28514
H2BC7	0.547552	0.000204	0.000322	0.426569	0.623475
LYST	0.547602	8.93e-10	2.88e-09	2.16042	3.15778
PTH2R	0.547631	0.015218	0.018707	3.03595	4.4376
CBX8	0.547777	5.83e-09	1.69e-08	6.54779	9.57177
BTN2A2	0.547844	5.78e-08	1.47e-07	4.28227	6.26025
CEP68	0.547959	2.05e-12	9.29e-12	3.59678	5.25856
SMURF1	0.548057	6.7e-10	2.19e-09	10.8089	15.8039
FGF12	0.548084	0.03746	0.04387	1.51677	2.21773
STAC3	0.5481	1.8e-05	3.29e-05	3.18785	4.66114
PPM1F	0.548201	2.24e-14	1.36e-13	6.45812	9.44345
MORC3	0.548267	6.16e-11	2.3e-10	6.28009	9.18355
AC013356.1	0.548373	0.008407	0.010692	0.229065	0.334992
THRAP3	0.548379	3.27e-17	3.13e-16	44.0942	64.4852
FXR1	0.548419	3.21e-17	3.09e-16	16.6157	24.3002
ZDHHC18	0.548455	1.26e-15	9.35e-15	13.2322	19.3523
RPS27AP11	0.548472	0.003625	0.004834	0.912139	1.33404
SS18	0.548489	5.29e-16	4.15e-15	18.3283	26.8062
AC090617.5	0.548535	0.001109	0.001586	0.317743	0.464731
AC002519.1	0.548537	0.001428	0.00201	0.026605	0.038913
TAB3	0.548551	3.57e-12	1.56e-11	7.80455	11.4151
DTYMK	0.548647	3.21e-10	1.09e-09	26.7903	39.1865
RLIM	0.548654	3.47e-12	1.52e-11	5.62455	8.22715
AC091152.4	0.548723	5.46e-06	1.06e-05	0.055551	0.08126
C19orf67	0.548728	4.98e-08	1.27e-07	0.164474	0.240591
PPIL1	0.548729	5.81e-11	2.17e-10	37.9202	55.4695
NOP14-AS1	0.54877	1.47e-11	5.95e-11	2.02395	2.96071
ISM1	0.54881	0.000753	0.001101	4.03056	5.89622
AC211476.6	0.548818	1.12e-05	2.1e-05	0.087201	0.127565
EXT1	0.54883	6.48e-07	1.43e-06	31.8	46.5202
PPP4R3B	0.548841	3.3e-15	2.27e-14	20.0294	29.3012
SOWAHA	0.548875	0.00206	0.002843	9.08426	13.2898
DNAJB14	0.548905	1.62e-10	5.73e-10	2.75298	4.02755
USP40	0.548923	4.52e-15	3.03e-14	10.1396	14.8342
AC139019.1	0.548943	1.09e-07	2.68e-07	0.327128	0.478593
RPL21P18	0.548986	0.038779	0.04533	0.087403	0.127875
CDRT15P12	0.548987	0.03462	0.040716	0.448942	0.656829
EDEM3	0.549036	6.68e-12	2.82e-11	18.3691	26.8759
ST3GAL2	0.549051	7.65e-12	3.2e-11	5.87109	8.59012
EIF3LP2	0.549234	0.001445	0.002032	0.178112	0.260633
ZNF807P	0.549243	0.00504	0.006597	0.048506	0.07098
PARP4	0.549256	2.65e-11	1.04e-10	19.326	28.2803
NAPB	0.549366	4.2e-16	3.34e-15	3.98459	5.83122
UTP4	0.549395	3.96e-11	1.51e-10	10.5113	15.383
KRT8	0.549418	4.57e-05	7.87e-05	261.944	383.354
SPATA5L1	0.549435	1.92e-15	1.38e-14	6.97256	10.2044
ZBED3	0.549437	2.31e-08	6.18e-08	7.42375	10.8648
WDFY2	0.549656	1.9e-10	6.66e-10	1.06175	1.55412
FEM1B	0.549663	5.8e-13	2.84e-12	13.5572	19.8443
SUMO2	0.549677	1.1e-15	8.23e-15	57.2978	83.87
GPR21	0.549678	0.000896	0.001298	0.096789	0.141675
DUSP11	0.549717	5.04e-18	5.63e-17	7.88289	11.539
AC104850.1	0.549724	6.44e-05	0.000109	0.120274	0.176057
PPM1J	0.549752	0.029949	0.035488	0.328746	0.481229
AC037487.3	0.549757	0.000822	0.001196	1.8348	2.68586
WFIKKN1	0.549854	4.46e-06	8.79e-06	0.394549	0.577595
TATDN2	0.549887	5.61e-14	3.19e-13	7.14421	10.4589
REPIN1	0.549993	2.64e-14	1.58e-13	64.5066	94.4427
SPTY2D1OS	0.549998	2.16e-08	5.8e-08	0.656322	0.96091
YTHDF2P1	0.550005	1.63e-11	6.55e-11	1.07438	1.573
TENT2	0.550006	1.33e-17	1.38e-16	11.597	16.9791
GSK3A	0.550008	4.43e-19	6.23e-18	11.6928	17.1193
NME6	0.550049	1.26e-18	1.59e-17	4.90599	7.18303
AC084125.2	0.550153	2.02e-09	6.21e-09	0.421065	0.616541
GTF2A1	0.550268	7.7e-13	3.71e-12	9.52241	13.9442
AC027228.3	0.550333	0.002889	0.003911	0.072459	0.106111
TMEM91	0.55034	2.22e-07	5.22e-07	2.7824	4.07463
OSMR-AS1	0.55042	0.042336	0.049263	0.150501	0.220411
RPS29P16	0.550456	0.000338	0.000518	0.706256	1.03435
SAMD8	0.55048	1.66e-10	5.86e-10	4.20808	6.16304
AL596275.1	0.550554	0.042685	0.049645	0.083558	0.122382
RBM39P1	0.550587	0.00143	0.002012	0.043853	0.064231
TRUB1	0.550591	1.48e-10	5.27e-10	8.26589	12.1069
EFNA4	0.550593	8.89e-08	2.2e-07	17.1371	25.1005
ATRN	0.550631	1.13e-07	2.76e-07	55.4058	81.1543
AC012181.2	0.550692	7.48e-07	1.64e-06	0.703024	1.02978
CEBPA-DT	0.550707	4.31e-07	9.75e-07	10.9194	15.9948
USP16	0.550712	7.16e-14	4.01e-13	11.7283	17.1797
MTF1	0.550724	1.4e-10	4.99e-10	2.80607	4.11039
CD63	0.550725	1.84e-09	5.69e-09	514.32	753.388
SNRPEP2	0.550733	6.63e-09	1.91e-08	5.10276	7.47467
AC124916.1	0.550743	0.000246	0.000384	0.301649	0.441867
NAF1	0.55078	8.22e-12	3.43e-11	2.2993	3.36819
AC004241.3	0.550782	1.96e-05	3.56e-05	0.878862	1.28743
AC091153.1	0.550828	4.67e-06	9.18e-06	2.08739	3.05788
POGLUT1	0.55084	1.63e-11	6.55e-11	3.56089	5.21648
SIPA1L1	0.55085	4.29e-13	2.13e-12	5.35665	7.84721
KCTD13	0.550864	1.49e-12	6.85e-12	3.76627	5.51744
AC091133.6	0.550929	8.51e-06	1.62e-05	0.538771	0.789315
HMGB1P37	0.550957	0.003946	0.005235	0.108754	0.159331
TOP3A	0.551133	3.68e-12	1.61e-11	6.13866	8.99459
AC093677.2	0.551168	0.000636	0.00094	0.162309	0.237827
MARCHF4	0.551172	0.011039	0.013831	0.09712	0.142308
AD001527.1	0.551216	2.05e-05	3.71e-05	0.301272	0.441459
WDR33	0.551226	7.99e-25	4.62e-23	8.06727	11.8212
TMUB2	0.551278	2.02e-16	1.7e-15	22.1371	32.4393
RHD	0.55129	2.58e-06	5.25e-06	0.237169	0.347546
FLII	0.551297	1.12e-11	4.58e-11	33.7112	49.4006
AC092418.2	0.551333	0.001956	0.002707	0.174931	0.256351
KIAA0825	0.551347	6.15e-07	1.36e-06	0.126534	0.18543
AC005740.3	0.551349	0.001611	0.002253	0.147947	0.21681
CMTR1	0.551356	8.87e-16	6.72e-15	21.3918	31.3488
ARPP19	0.551379	9e-14	4.97e-13	26.9627	39.5134
TEX22	0.551493	1.5e-09	4.7e-09	0.379116	0.555632
RBMXP2	0.551502	0.007066	0.009077	0.576115	0.844359
CRTC2	0.551513	5.91e-17	5.44e-16	33.2449	48.7245
EIF4E	0.551522	1.42e-12	6.58e-12	2.45164	3.5932
SAMD4A	0.551537	4.17e-10	1.4e-09	3.55614	5.21205
SRRM1	0.551545	3.36e-14	1.97e-13	12.2159	17.9043
AC093535.2	0.551582	1e-06	2.15e-06	1.10061	1.61315
ITPRID2	0.551635	1.24e-09	3.92e-09	18.8309	27.6013
COX16	0.551661	3.67e-09	1.09e-08	2.37436	3.48027
TMBIM4	0.551691	1.76e-08	4.79e-08	8.54559	12.5261
AC115618.1	0.551739	1.87e-06	3.88e-06	0.691286	1.01332
SLC22A9	0.55186	0.004674	0.006144	45.0879	66.0978
A1BG-AS1	0.55186	8.63e-06	1.64e-05	0.574058	0.841554
NAA50	0.552016	3.65e-15	2.49e-14	30.4501	44.6439
TRAPPC6B	0.552016	6.69e-08	1.69e-07	1.22037	1.78923
LINC01852	0.552058	0.001259	0.001786	0.498497	0.730884
MRPL30	0.552181	1.11e-18	1.42e-17	14.8755	21.812
AL031123.3	0.552224	2.05e-07	4.84e-07	0.387331	0.567961
DPAGT1	0.552246	1.24e-16	1.08e-15	19.6592	28.8276
LETMD1	0.552356	1.79e-18	2.2e-17	16.848	24.7072
SH3GLB1	0.552369	2.16e-13	1.12e-12	18.142	26.6051
EFCAB11	0.552382	3.38e-13	1.71e-12	1.39318	2.04311
CEP57	0.55245	9.48e-11	3.45e-10	10.9347	16.0366
MBD2	0.55252	1.78e-14	1.09e-13	17.2436	25.2903
PROKR1	0.552553	1.4e-06	2.95e-06	0.102188	0.149876
SPG11	0.552562	5.37e-10	1.78e-09	7.79312	11.4301
KCTD18	0.552571	3.68e-13	1.85e-12	5.38052	7.8916
AC083862.1	0.552599	7.99e-06	1.52e-05	1.21768	1.786
ATP6V1B2	0.552623	7.76e-10	2.52e-09	14.8801	21.8253
HSP90AB3P	0.552656	6.91e-05	0.000116	0.738582	1.08334
MLKL	0.552698	4.2e-05	7.28e-05	2.93494	4.30505
AC068792.1	0.552715	8.63e-07	1.87e-06	0.79685	1.16885
CAB39	0.552758	1.46e-15	1.06e-14	23.1366	33.9388
MSH6	0.552776	6.04e-11	2.26e-10	8.59128	12.6026
HMGN3	0.552784	4.96e-08	1.27e-07	75.8569	111.275
ACP4	0.552786	3.98e-08	1.03e-07	0.926818	1.35956
TRIP11	0.552817	7.58e-12	3.17e-11	5.97926	8.77126
SCFD1	0.552949	2.92e-23	1.07e-21	2.90772	4.26587
CPSF1	0.552974	5.2e-12	2.23e-11	32.7518	48.0504
ENTR1P2	0.552977	0.028282	0.03362	0.071346	0.104673
AC097532.2	0.552989	0.036456	0.042747	0.076934	0.112872
AC004076.1	0.553159	0.001974	0.00273	0.039088	0.057354
RAB6A	0.553161	5.58e-15	3.69e-14	34.9868	51.336
AC025682.1	0.553178	6.05e-08	1.53e-07	0.355415	0.521506
ACACA	0.55322	4.36e-11	1.66e-10	9.13627	13.4062
ZNF212	0.553222	4.04e-16	3.22e-15	9.40976	13.8075
C11orf58	0.553253	1.64e-17	1.67e-16	22.6697	33.2653
ST13P5	0.553301	0.000221	0.000347	0.546305	0.80167
INTS6	0.553304	3.87e-12	1.69e-11	2.04406	2.99955
PPP1R12C	0.553321	9.21e-20	1.51e-18	16.8388	24.7103
TPRKB	0.553442	3.97e-16	3.17e-15	17.7839	26.0994
SEC22B4P	0.553485	7.15e-05	0.00012	0.260017	0.381607
ATF4	0.553656	3.55e-13	1.79e-12	206.748	303.464
TFDP2	0.553678	1.03e-13	5.63e-13	5.2552	7.7137
GHET1	0.553717	4.2e-07	9.51e-07	0.340959	0.500481
EXOC7	0.55386	1.47e-11	5.95e-11	8.67047	12.7283
SFMBT1	0.553868	4.51e-11	1.71e-10	4.74589	6.96704
PPIAP82	0.553881	0.000274	0.000425	0.443549	0.651143
SRI	0.554102	0.000134	0.000218	13.474	19.7833
AC100827.4	0.554255	3.13e-06	6.29e-06	0.026845	0.039419
BCL2L1	0.554318	1.77e-08	4.81e-08	58.23	85.5092
RBM7	0.554337	1.07e-15	8.05e-15	3.88658	5.70742
ST13P7	0.554361	1.31e-05	2.43e-05	0.33579	0.493114
ZNF75D	0.554405	7.65e-12	3.2e-11	3.25324	4.77758
COPB2	0.554427	1.95e-15	1.39e-14	15.1223	22.2083
EEF1A1P12	0.554461	9.62e-05	0.000159	1.67485	2.45972
MIR3682	0.55453	8.04e-05	0.000134	17.3608	25.4976
RPL23AP37	0.554543	0.003685	0.004911	0.134563	0.197633
WDR77	0.554607	9.9e-15	6.33e-14	11.6178	17.0638
AL136295.6	0.554655	1.9e-07	4.51e-07	1.36935	2.01132
AC008753.1	0.554658	0.000145	0.000234	0.498013	0.731492
AP001610.2	0.554861	4.51e-05	7.78e-05	0.083855	0.123186
PAQR3	0.554863	7.93e-07	1.73e-06	1.25595	1.84503
RNF146	0.554907	1.48e-14	9.19e-14	12.2666	18.0206
UACA	0.554988	1.62e-12	7.41e-12	7.01881	10.3117
AC009962.1	0.555013	4.84e-07	1.09e-06	0.175345	0.257613
UBQLNL	0.555187	1.95e-05	3.54e-05	0.401848	0.590459
MFAP1	0.555208	3.1e-16	2.52e-15	22.7037	33.3604
AC009237.14	0.555232	9.38e-10	3.01e-09	3.08098	4.52721
IGHV3-13	0.555244	0.007887	0.010066	2.7433	4.03105
RNU6-485P	0.55526	0.022264	0.026825	1.22695	1.80292
RBCK1	0.555275	2.68e-13	1.38e-12	54.2699	79.7469
CYFIP1	0.555308	1.64e-12	7.53e-12	17.8246	26.1929
ZNF710-AS1	0.555312	2.25e-07	5.27e-07	3.90808	5.74286
RSPH14	0.555324	0.000235	0.000368	0.455677	0.669617
AL359644.1	0.555371	0.005033	0.006588	0.271939	0.399627
ENTPD7	0.555405	1.11e-08	3.1e-08	4.11425	6.04622
TTC8	0.555422	6.68e-12	2.82e-11	3.45777	5.08154
TTC17	0.555441	1.84e-19	2.84e-18	13.1164	19.276
AC008514.2	0.555546	0.014172	0.017495	0.05802	0.085274
AC008677.2	0.555555	0.004593	0.006043	0.269	0.395359
WDR48	0.555661	4.61e-19	6.46e-18	8.26025	12.1413
FGD4	0.555737	2.85e-05	5.05e-05	4.51258	6.63314
H4C8	0.555738	0.036452	0.042744	4.5168	6.63935
SUPT5H	0.555747	1.94e-18	2.37e-17	32.9217	48.3925
ACD	0.55575	1.23e-12	5.77e-12	8.55924	12.5815
APOBEC3H	0.555769	0.014205	0.017536	1.00217	1.47314
AC018653.3	0.555791	5.17e-07	1.16e-06	2.7285	4.01082
RCHY1	0.555815	6.36e-11	2.37e-10	3.3737	4.95933
FBL	0.555872	4.66e-10	1.55e-09	124.044	182.352
RBM45	0.55589	8.17e-23	2.68e-21	3.36495	4.94674
AL391825.1	0.555925	0.002712	0.003684	0.856999	1.25988
SECISBP2L	0.555927	1.13e-10	4.09e-10	7.97235	11.7203
TMSB4XP4	0.55593	0.00023	0.000361	1.86674	2.74433
AC114763.1	0.555959	5.02e-09	1.46e-08	0.555119	0.816105
AC145676.1	0.556035	6.05e-05	0.000102	0.160604	0.236123
MAPKAPK3	0.55604	7.52e-15	4.89e-14	19.6272	28.8565
RRAGC	0.556074	2.16e-09	6.61e-09	7.04657	10.3603
CCDC117	0.556164	9.45e-13	4.5e-12	25.3112	37.2164
AC097638.1	0.556336	0.001361	0.001922	0.105777	0.155548
ABCA3	0.556351	4.02e-06	7.98e-06	3.43809	5.05587
DCTD	0.556402	6.42e-12	2.71e-11	32.7503	48.1625
AC016583.1	0.556454	0.03359	0.039572	0.060615	0.089144
NUTM2A	0.556479	0.001091	0.001562	0.119825	0.176224
NANP	0.556505	3.37e-16	2.73e-15	4.22446	6.21291
AC073073.1	0.556571	1.32e-06	2.8e-06	0.956196	1.40634
SUB1P3	0.556658	0.005472	0.007128	0.448605	0.659834
DIP2C	0.556774	1.5e-06	3.16e-06	6.41707	9.43936
CMTR2	0.55679	1.08e-08	3.01e-08	3.90322	5.74161
AZIN2	0.556815	9.96e-06	1.87e-05	0.459087	0.675325
KCTD5	0.556891	3.21e-14	1.89e-13	14.7078	21.6366
EXOC3L4	0.5569	0.004535	0.00597	17.9997	26.4794
PPIAP51	0.556912	0.001467	0.002062	0.106641	0.156882
PPIAP29	0.556999	0.014848	0.018278	9.36439	13.7769
CFL1P2	0.557048	0.000415	0.000628	0.10263	0.150994
HMGB1P6	0.557061	2.91e-09	8.77e-09	18.2985	26.922
TMA16	0.557132	1.5e-12	6.91e-12	7.55308	11.1132
GATAD1	0.557183	4.45e-21	9.55e-20	12.3392	18.1558
AC010969.2	0.55721	7.55e-12	3.16e-11	2.72207	4.00531
MAPKAPK5-AS1	0.557258	9.06e-14	5e-13	6.81596	10.0295
AC025449.2	0.557265	0.00558	0.007261	0.05951	0.087567
ZNF674	0.557303	1.12e-15	8.39e-15	0.972848	1.43156
AGTR1	0.557319	0.002429	0.003319	23.3846	34.4112
ATP6V0A2	0.557319	1.3e-17	1.35e-16	1.7308	2.54692
AC084824.5	0.557333	1.63e-10	5.76e-10	1.94164	2.85722
RPL37AP8	0.557345	0.018397	0.022401	0.156819	0.230768
NOP53-AS1	0.557356	3.06e-06	6.17e-06	0.464602	0.683694
DCLK3	0.557368	0.000216	0.00034	0.105705	0.155554
RPS18P13	0.557413	0.006175	0.007987	0.228748	0.336632
CACYBPP2	0.557429	9.41e-05	0.000156	0.445369	0.655425
SLC9B1	0.557473	2.77e-09	8.39e-09	0.224362	0.330192
Z74021.1	0.557523	0.000711	0.001042	2.62588	3.86462
EIF4BP7	0.557547	5.91e-08	1.5e-07	3.23273	4.75781
RPL9P18	0.557605	0.026681	0.031828	0.330309	0.486157
AL450326.2	0.557661	0.022777	0.027408	0.039229	0.05774
MKNK1	0.557678	2.06e-16	1.73e-15	4.62676	6.81011
WDR4	0.557685	3.29e-12	1.45e-11	7.62987	11.2304
AC100814.1	0.557692	4.23e-08	1.09e-07	3.79739	5.58942
DCPS	0.557781	0.000637	0.00094	17.9037	26.3543
DCTN2	0.557828	1.38e-14	8.62e-14	16.4423	24.2039
KIZ	0.557846	5.05e-11	1.91e-10	6.48504	9.54643
TUBGCP3	0.557868	4.27e-16	3.39e-15	6.05616	8.91523
SLFN14	0.557942	2.46e-05	4.4e-05	0.016166	0.023798
SNX12	0.557947	4.3e-14	2.48e-13	32.2559	47.4863
AC092296.4	0.557999	0.008502	0.010808	0.614801	0.905126
TIGAR	0.5581	6.65e-06	1.28e-05	0.612253	0.901438
TRIP12	0.558197	4.34e-16	3.44e-15	17.0665	25.1292
AL356123.2	0.55823	4.57e-06	9e-06	1.39162	2.04911
SNRPB2	0.558274	1.68e-15	1.21e-14	34.2759	50.4715
AC090948.1	0.558298	1.2e-08	3.33e-08	0.898701	1.32336
AC026748.7	0.558313	6.95e-08	1.75e-07	3.44825	5.07771
AL807761.2	0.558327	0.00013	0.000211	0.194248	0.286042
RPL26P19	0.558393	0.00428	0.005654	3.21416	4.73326
RN7SL521P	0.5584	4.26e-07	9.63e-07	0.841126	1.23867
TRIM13	0.55842	1.03e-12	4.87e-12	2.7464	4.04451
AC008610.1	0.558436	1.29e-08	3.56e-08	2.30428	3.39345
PRKACB	0.558452	2.85e-08	7.54e-08	7.9019	11.637
TMEM209	0.55849	1.7e-13	8.99e-13	8.51019	12.5332
LCLAT1	0.558512	2.07e-12	9.35e-12	4.30618	6.34193
DDX54	0.558519	6.86e-19	9.22e-18	24.7071	36.3875
HTATSF1	0.558532	5.4e-13	2.66e-12	42.9506	63.2563
MAX	0.558604	2.7e-17	2.63e-16	10.3936	15.3082
DSTN	0.558732	7.99e-08	1.99e-07	107.4	158.198
CEBPZOS	0.558805	1.51e-16	1.3e-15	14.2253	20.9546
GLTP	0.558826	3.61e-16	2.9e-15	19.9235	29.3487
ORMDL1	0.558894	2.36e-23	8.9e-22	13.7123	20.2001
PRPF4	0.558932	2.92e-12	1.3e-11	12.5208	18.4454
NCBP1	0.558947	1.37e-13	7.33e-13	10.658	15.7014
PTPN5	0.559023	0.002971	0.004015	0.063239	0.093169
CNOT7	0.559034	3.92e-10	1.32e-09	8.42345	12.4101
RPL21P44	0.559082	0.003803	0.005059	0.118302	0.174297
ZKSCAN5	0.559098	1.27e-15	9.42e-15	4.59658	6.77237
AP3B1	0.559106	4.27e-16	3.39e-15	15.4964	22.8317
TTC33	0.559165	1.18e-11	4.84e-11	3.98962	5.87837
AL136301.1	0.55926	0.001616	0.002259	0.152194	0.22426
TMBIM1	0.559303	3.52e-16	2.83e-15	85.0692	125.354
ELP4	0.559339	2.93e-18	3.45e-17	0.730553	1.07654
PTGDR	0.559342	0.004221	0.005579	0.249464	0.367609
GGNBP2	0.559359	5.61e-21	1.17e-19	12.6822	18.6887
AC087500.2	0.559364	6.16e-05	0.000104	0.322035	0.474557
RPS6P16	0.559394	0.011131	0.013939	0.053417	0.078718
AC104837.1	0.559415	3.11e-05	5.48e-05	0.164782	0.242834
ICAM2	0.559417	0.001487	0.002088	2.52667	3.72349
ENGASE	0.55952	2.09e-11	8.29e-11	8.07493	11.9007
LINC00847	0.559525	8.76e-09	2.48e-08	0.878761	1.2951
DDX5	0.559569	3.47e-16	2.8e-15	82.9737	122.289
MBNL1-AS1	0.559593	4.79e-06	9.39e-06	0.215512	0.317633
LINC00365	0.55964	0.002735	0.003713	0.516688	0.761547
RPL13AP23	0.559689	0.026097	0.031159	0.097422	0.143595
RAP1B	0.559853	3.88e-15	2.63e-14	3.3474	4.93446
AL121603.2	0.55989	3.04e-10	1.04e-09	1.2621	1.86053
AC012063.1	0.559957	2.85e-09	8.6e-09	0.116517	0.171773
GLIDR	0.559976	0.006447	0.008321	0.072625	0.107067
Z69666.1	0.560053	0.001529	0.002144	0.098806	0.145673
DTX1	0.560085	0.004825	0.006331	9.29484	13.7039
ZHX2	0.5602	3.85e-10	1.3e-09	23.5628	34.7427
PPP1CB	0.560273	2.83e-14	1.68e-13	42.2011	62.2276
AC007406.1	0.560316	0.014132	0.01745	0.450634	0.664502
PA2G4P2	0.560325	0.002721	0.003695	0.042152	0.062157
RPS6	0.560328	3.61e-08	9.43e-08	873.769	1288.46
FAM209B	0.560391	1.39e-05	2.57e-05	0.308723	0.455264
STOX1	0.560402	2.11e-06	4.34e-06	0.906332	1.33655
ZSWIM9	0.560434	5.33e-15	3.54e-14	4.84936	7.15142
AC025871.3	0.560463	0.000991	0.001427	0.046298	0.068278
SHQ1	0.560477	6.21e-15	4.08e-14	4.39098	6.47562
AC026748.3	0.560493	0.013085	0.016232	0.048548	0.071598
RAB22A	0.560541	2.12e-16	1.78e-15	8.50256	12.5398
RGS3	0.560593	3.14e-06	6.31e-06	7.56411	11.1561
FBXW7	0.560613	3.69e-15	2.51e-14	2.45772	3.62488
TXLNA	0.560619	5.25e-14	3e-13	33.7903	49.8374
LNCSRLR	0.560659	7.45e-05	0.000125	0.659315	0.972452
AC022306.3	0.560688	3.65e-06	7.28e-06	0.687259	1.01369
SH2D6	0.560709	2.32e-06	4.75e-06	0.219037	0.323078
KIAA0100	0.56071	6.27e-13	3.06e-12	14.2791	21.0616
RPL7AP66	0.560766	0.000377	0.000573	1.05322	1.55355
MCPH1	0.560789	2.53e-11	9.93e-11	1.84277	2.71822
AC083964.2	0.560872	0.009609	0.012131	0.089555	0.132108
CXorf38	0.560881	1.04e-12	4.9e-12	6.14497	9.06487
SAMD1	0.560897	2.6e-12	1.16e-11	34.5826	51.0157
WDR1	0.560979	1.71e-12	7.84e-12	51.1418	75.4479
PTPN6	0.561017	4.17e-11	1.59e-10	15.9202	23.4873
TEDC1	0.561086	6.66e-09	1.92e-08	2.24267	3.30878
ZC3H7A	0.561214	3.21e-14	1.89e-13	9.10598	13.436
GZF1	0.561224	1.35e-16	1.17e-15	5.08104	7.49717
RPS6KB1	0.561277	8.01e-17	7.23e-16	6.49694	9.58672
GNAQ	0.561292	6.9e-14	3.87e-13	15.0559	22.2163
HNF1A	0.561375	1.22e-09	3.85e-09	7.42353	10.9547
ANO10	0.561397	2.42e-07	5.64e-07	11.6634	17.2117
WDR11	0.561414	1.49e-12	6.85e-12	7.23864	10.6822
EMC1	0.561475	8.02e-11	2.95e-10	10.308	15.2123
PRAL	0.561487	0.000372	0.000567	0.057489	0.084841
Z99129.4	0.561491	9.15e-10	2.94e-09	4.41934	6.52204
PTGES3P3	0.56152	3.82e-07	8.69e-07	2.64653	3.90581
GID8	0.56154	5.91e-19	8.09e-18	34.4325	50.817
ELAVL1	0.561591	3.6e-22	1.01e-20	18.6573	27.5362
GIMAP7	0.561624	0.005025	0.006579	16.6395	24.5588
C1orf226	0.561626	4.35e-06	8.6e-06	10.5892	15.6289
ARFGAP3	0.561684	2.18e-14	1.32e-13	32.8709	48.5172
PLA2G12AP1	0.561686	0.000267	0.000415	0.34802	0.513675
SLC25A14	0.561687	4.06e-12	1.76e-11	3.27388	4.83223
FRMD4B	0.561736	1.88e-08	5.09e-08	3.94397	5.82147
ARF6	0.561766	3.85e-17	3.66e-16	52.276	77.1633
PDE3A	0.561829	0.000575	0.000854	1.36159	2.00989
AC092807.3	0.561865	0.00377	0.005018	0.078507	0.11589
AC079447.1	0.561868	5.36e-08	1.37e-07	0.252415	0.372609
IGHJ3	0.561873	0.002059	0.00284	6.61233	9.76102
OR51E1	0.561883	0.003983	0.005281	0.384236	0.567207
PCIF1	0.561913	2.15e-18	2.6e-17	22.2126	32.7908
AL162741.1	0.561927	2.35e-05	4.23e-05	0.226072	0.333736
AF230666.1	0.561947	1.65e-06	3.45e-06	0.122556	0.180924
GALNT2	0.561982	3.41e-09	1.02e-08	32.8028	48.4266
ZC3H18	0.561984	3.13e-15	2.15e-14	7.88589	11.6419
MRTFB	0.562094	2.27e-08	6.08e-08	2.45483	3.62434
CRIM1	0.562123	0.005335	0.00696	15.9106	23.491
MBIP	0.562142	3.16e-13	1.61e-12	8.19084	12.0935
PPP1R8	0.562167	1.98e-17	1.98e-16	19.5471	28.861
AC104297.1	0.562253	0.002685	0.003649	0.050001	0.07383
ZNF429	0.56228	7.14e-09	2.04e-08	2.43262	3.592
ARL6IP5	0.562281	3.75e-09	1.11e-08	52.9687	78.2137
CRTC3-AS1	0.562328	9.45e-08	2.33e-07	0.417572	0.616607
CWF19L1	0.562363	1.54e-15	1.12e-14	8.25271	12.1867
XRCC5	0.562383	8.14e-17	7.33e-16	83.9832	124.019
BCAR1	0.562457	4.7e-07	1.06e-06	14.2921	21.1064
ARIH2OS	0.562498	7.18e-13	3.47e-12	2.71479	4.00927
WBP1P2	0.562572	0.003726	0.004963	0.176122	0.260114
PRR16	0.562692	2.03e-06	4.19e-06	0.820714	1.21221
ADAM15	0.562759	1.75e-07	4.17e-07	31.2818	46.2061
DOCK4	0.562764	1.56e-09	4.86e-09	4.02231	5.94133
ARRDC1	0.562778	3.41e-15	2.33e-14	14.1311	20.8732
ASTE1	0.56283	5.19e-17	4.81e-16	2.77087	4.09303
IFT122	0.562878	6.78e-11	2.52e-10	3.92909	5.80411
AL139424.3	0.562927	3.74e-06	7.45e-06	0.110044	0.162564
CAP1	0.562944	2.79e-11	1.09e-10	98.338	145.273
HCP5	0.563102	0.000102	0.000167	6.19234	9.14882
AC009121.3	0.563112	1.63e-05	2.98e-05	0.228455	0.337532
KRT18P48	0.563142	4.21e-05	7.29e-05	0.072338	0.106878
MIR194-2HG	0.56325	7.99e-08	1.99e-07	0.980044	1.44811
C5orf67	0.56331	0.017973	0.021918	0.118437	0.175009
PIK3CB	0.563319	2.78e-12	1.24e-11	8.06937	11.9238
STXBP1	0.563342	0.000142	0.000229	2.33921	3.45662
DLGAP4-AS1	0.563393	7.05e-06	1.36e-05	0.277997	0.410807
RPL39P38	0.5635	0.00089	0.001289	1.02069	1.50843
LRRC41	0.563538	5.97e-13	2.92e-12	14.1525	20.9158
MYL6B	0.563545	1.13e-07	2.76e-07	13.6609	20.1893
KATNA1	0.563568	1.01e-14	6.42e-14	7.82078	11.5585
KCNRG	0.563578	7.24e-05	0.000121	0.107424	0.158765
AC027682.1	0.563578	0.0075	0.009598	0.160663	0.237449
SERPINB1	0.56363	2.58e-09	7.83e-09	55.8681	82.5721
CDC23	0.563822	2.52e-15	1.76e-14	13.8996	20.5462
CCDC137	0.563931	4.55e-13	2.26e-12	22.2492	32.8908
PTP4A2P1	0.563958	8.93e-05	0.000148	2.2197	3.28142
RPS27P21	0.563998	0.013065	0.016208	0.683626	1.01065
NPIPP1	0.564001	2.33e-09	7.1e-09	2.44392	3.61301
ANAPC5	0.564005	5.06e-20	8.72e-19	17.521	25.9025
AC079414.3	0.564054	2.97e-11	1.16e-10	1.58067	2.33689
SRSF9P1	0.564126	1.37e-07	3.31e-07	0.644634	0.953086
ITIH4-AS1	0.564263	0.011311	0.014148	0.499146	0.738053
FAM86C2P	0.564335	1.17e-12	5.47e-12	1.58964	2.35061
TMX4	0.564357	3.93e-11	1.51e-10	25.1105	37.1317
AL591043.2	0.564397	2.92e-05	5.17e-05	0.126488	0.187047
AL358472.1	0.564453	0.004225	0.005584	0.124296	0.183813
AC104596.1	0.564453	1.34e-06	2.84e-06	0.339373	0.501873
PLAT	0.56447	0.001587	0.002221	4.03819	5.97186
EPHA2	0.564516	3.53e-06	7.05e-06	13.3306	19.7144
DGCR11	0.564541	2.7e-12	1.2e-11	1.69811	2.51136
MKS1	0.564542	4.6e-11	1.74e-10	1.66016	2.45524
CAVIN2-AS1	0.564552	9.05e-05	0.00015	0.044881	0.066376
KIAA1614-AS1	0.564606	0.000597	0.000885	0.102682	0.151865
FCF1	0.564632	2.1e-15	1.49e-14	11.1837	16.5408
CASP1	0.564708	0.000924	0.001336	6.29572	9.31192
DPYD	0.564749	1.16e-05	2.17e-05	14.7917	21.8788
MAP3K14	0.564756	0.002014	0.002782	8.08386	11.9571
KIAA1143	0.564757	3.79e-14	2.2e-13	7.75434	11.4697
CCND3	0.564766	6.83e-06	1.31e-05	12.2937	18.1841
SLC35A2	0.564868	4.51e-17	4.23e-16	20.9799	31.0346
SDE2	0.564985	6.2e-12	2.63e-11	14.5361	21.5043
UBLCP1	0.565001	1.59e-16	1.36e-15	15.5412	22.9915
ANP32B	0.565067	6.46e-10	2.12e-09	123.549	182.786
NDUFA7	0.565093	7.84e-12	3.28e-11	0.40751	0.602904
TNFRSF10B	0.565217	2.53e-11	9.93e-11	22.434	33.1936
RPLP0	0.56524	1.01e-09	3.23e-09	684.07	1012.17
AL162595.1	0.565304	3.2e-12	1.41e-11	5.39972	7.98995
SENP5	0.565327	1.24e-21	3.03e-20	7.90796	11.7016
Z97633.1	0.565393	0.000285	0.000441	0.208184	0.308069
CTSS	0.565435	0.017477	0.021341	59.9904	88.7757
RNF170	0.565465	1.02e-08	2.87e-08	8.06207	11.9308
C9orf152	0.565468	0.025058	0.03	2.52671	3.73919
C12orf65	0.565485	1.72e-19	2.67e-18	5.28131	7.81574
CHIC2	0.56551	2.34e-11	9.21e-11	14.2333	21.064
AXIN1	0.565512	5.82e-10	1.92e-09	7.99936	11.8384
PARP11	0.565522	5.67e-09	1.65e-08	1.80813	2.6759
RFFL	0.565558	2.32e-09	7.06e-09	7.04777	10.4304
PHKA1	0.565605	0.001805	0.002508	1.25692	1.86026
KCNE4	0.565611	0.001407	0.001982	2.98337	4.41543
AC068533.3	0.565646	0.000576	0.000855	0.208648	0.308809
DAZAP2P1	0.56567	0.000143	0.000231	1.21937	1.80475
PANK2	0.565729	2.95e-16	2.41e-15	5.16058	7.63835
USP47	0.565771	1.44e-10	5.11e-10	6.40064	9.47409
AC023632.2	0.565784	2.66e-06	5.4e-06	0.23382	0.346098
HIKESHIP2	0.565853	2.51e-08	6.69e-08	0.981055	1.45222
YTHDF1	0.565897	2.35e-21	5.37e-20	36.8774	54.5899
RNF141	0.565918	7.49e-14	4.17e-13	7.4949	11.0949
SEC1P	0.565993	0.000117	0.00019	0.09315	0.1379
HMGB1	0.565998	7.56e-18	8.17e-17	37.5271	55.5555
MYLK3	0.566038	0.0014	0.001973	0.08344	0.123529
FLNB	0.566099	5.13e-12	2.2e-11	30.8135	45.6198
KCTD2	0.566114	1.4e-13	7.48e-13	11.6293	17.2176
ARHGEF6	0.566267	0.000419	0.000634	3.86478	5.72253
GRHL3	0.566285	0.00435	0.005739	0.37164	0.550289
FLI1	0.566289	0.001735	0.002416	2.74168	4.05963
TMX1	0.566308	1.1e-13	5.99e-13	14.9313	22.1092
ELK3	0.566355	1.32e-07	3.21e-07	9.88998	14.6449
LINC01278	0.566388	3.52e-16	2.83e-15	2.43646	3.60794
HNRNPK	0.566536	4.79e-22	1.29e-20	152.09	225.239
MYBL1	0.566584	1.3e-13	7e-13	1.50122	2.22333
CHAMP1	0.566672	6.7e-14	3.77e-13	6.63008	9.81983
RPS18	0.566678	1.32e-09	4.17e-09	1297.55	1921.81
THEM4	0.566717	1.88e-13	9.88e-13	7.25919	10.7519
CYB561A3	0.566803	3.73e-14	2.17e-13	5.50258	8.15062
CBWD6	0.566826	5.41e-09	1.57e-08	0.291635	0.431987
USP27X-AS1	0.566857	6.25e-06	1.21e-05	0.985125	1.45926
ANKZF1	0.566888	8.73e-18	9.33e-17	10.6622	15.7942
SLCO4A1-AS1	0.566974	5.18e-09	1.51e-08	0.398835	0.59084
ZW10	0.56698	2.77e-17	2.69e-16	11.8152	17.5033
LMF1-AS1	0.566985	0.011148	0.013959	0.053205	0.078819
DCTN5	0.566993	9.12e-10	2.94e-09	5.62133	8.32762
EFL1	0.567006	1.33e-14	8.32e-14	8.14988	12.0736
IRGQ	0.567084	1.03e-16	9.1e-16	5.59994	8.29645
CEP76	0.567084	9.32e-13	4.44e-12	1.48478	2.19973
GAPVD1	0.567108	7.22e-16	5.54e-15	4.26584	6.32006
HSP90AB2P	0.567115	6.14e-06	1.19e-05	0.511774	0.758222
CCRL2	0.567185	0.006514	0.008404	1.67579	2.4829
RPSAP49	0.567236	0.012618	0.015692	0.130509	0.193372
PSMD5	0.567265	8.69e-13	4.16e-12	12.5142	18.5425
ADORA2A	0.567269	7.1e-06	1.36e-05	0.844048	1.25064
USP13	0.567294	3.03e-13	1.55e-12	4.95143	7.33674
AKIP1	0.567485	3.87e-14	2.25e-13	15.4855	22.9486
AL359532.1	0.567539	2.69e-07	6.25e-07	0.480512	0.712115
NMNAT3	0.567585	1e-06	2.16e-06	0.749174	1.11031
AC107884.1	0.567697	8.27e-08	2.06e-07	0.319054	0.472888
PANK3	0.56772	9.56e-12	3.96e-11	17.1461	25.4136
USP32	0.567728	5.27e-12	2.26e-11	8.03066	11.9029
PEX26	0.567759	1.64e-17	1.67e-16	5.20573	7.71604
STK10	0.567846	1.81e-06	3.75e-06	5.60451	8.30762
LAMB3	0.567996	0.027445	0.032678	15.9733	23.6798
TMEM131	0.568053	5.54e-15	3.67e-14	8.5043	12.6078
NOA1	0.568075	9.59e-13	4.56e-12	14.7006	21.7943
ZNF865	0.568076	1.45e-14	9e-14	8.99873	13.341
ZNF830	0.568081	1.7e-14	1.04e-13	10.5222	15.5997
EZH1	0.568112	2.91e-17	2.82e-16	7.06548	10.4752
RNF32-AS1	0.568124	1.13e-06	2.42e-06	0.229806	0.340709
AC109326.1	0.568137	4.02e-06	7.98e-06	0.41653	0.61755
GIPC1	0.568189	6.64e-12	2.8e-11	41.9856	62.2504
LDAH	0.568211	2.05e-15	1.46e-14	7.45701	11.0564
IGSF6	0.568243	0.016363	0.020039	6.12547	9.08234
AL356512.1	0.568258	0.000214	0.000337	0.208951	0.309818
MRPL50	0.568259	1.32e-13	7.09e-13	14.9153	22.1154
GALNT1	0.568326	3.61e-11	1.39e-10	37.0484	54.9355
PACSIN2	0.568417	1.28e-12	5.96e-12	45.1878	67.0089
PTDSS2	0.568536	2.07e-13	1.08e-12	9.55167	14.1653
AL136172.1	0.568631	0.018384	0.022388	0.051528	0.076422
SMIM15-AS1	0.568652	0.00169	0.002358	0.068695	0.101884
TSEN15	0.56866	7.4e-18	8.01e-17	5.10073	7.56512
AL022313.2	0.568698	0.03763	0.044046	0.160044	0.237374
POLK	0.568729	9.67e-10	3.1e-09	2.48815	3.69046
PTP4A3	0.568755	7.55e-06	1.44e-05	24.0483	35.6695
KLRG1	0.568791	0.000299	0.000462	0.863006	1.28008
AL121820.1	0.568795	0.000241	0.000376	0.141494	0.209876
AL096794.1	0.568805	0.008172	0.010409	0.042703	0.063341
AAAS	0.568809	2.34e-25	1.6e-23	17.503	25.9622
AC018628.1	0.568882	3.37e-11	1.3e-10	0.721939	1.0709
SPSB2	0.568883	3.57e-08	9.33e-08	9.57907	14.2094
TCAF1	0.568899	5.65e-10	1.86e-09	6.96734	10.3353
WNT8B	0.568993	2.82e-06	5.7e-06	0.08126	0.120549
LINC01238	0.56901	0.003095	0.004172	0.47633	0.706638
NUMB	0.569079	3.41e-16	2.76e-15	10.8308	16.0684
FGFBP3	0.569085	3.26e-07	7.48e-07	0.730746	1.08412
LINC02246	0.569156	0.007392	0.009468	0.039749	0.058975
DLAT	0.569166	2.03e-06	4.18e-06	13.3801	19.8515
TMEM69	0.569228	1.36e-15	9.97e-15	28.0727	41.6523
CEACAM16	0.569262	0.00304	0.004103	0.117436	0.174247
AC005332.6	0.569424	2.74e-15	1.91e-14	12.6067	18.7075
TICAM1	0.569434	1.53e-10	5.43e-10	25.1663	37.3453
HNRNPF	0.569505	2.32e-16	1.93e-15	128.256	190.333
VN2R17P	0.56951	0.015158	0.018637	0.060863	0.090323
STK32C	0.569541	0.000291	0.00045	3.30356	4.90265
KLHL7-DT	0.569608	2.39e-05	4.29e-05	0.314075	0.466125
AC107959.1	0.569647	4.34e-05	7.5e-05	0.193889	0.287763
PIGU	0.569667	2.66e-14	1.59e-13	24.2345	35.9684
ABCA2	0.569797	6.89e-06	1.33e-05	14.0644	20.876
IFT46	0.569834	4.68e-06	9.2e-06	4.84003	7.18431
AC024884.2	0.569875	0.0003	0.000462	0.215146	0.319362
AL589765.4	0.569989	7.42e-05	0.000124	2.63847	3.91683
ABCC3	0.570097	3.22e-05	5.68e-05	42.1892	62.6351
IQCG	0.570117	1.05e-05	1.97e-05	1.44528	2.14573
RBM43	0.570142	1.73e-11	6.96e-11	3.48694	5.17696
CENATAC-DT	0.57017	2.28e-08	6.11e-08	1.27824	1.8978
PRKAB2	0.570173	1.47e-09	4.59e-09	33.276	49.405
AGBL2	0.570239	6.33e-09	1.83e-08	1.194	1.77282
AC004706.1	0.570283	1.58e-06	3.31e-06	0.346167	0.513994
FBRS	0.57029	4.08e-17	3.86e-16	15.1984	22.5669
TXNDC12	0.570319	8e-10	2.59e-09	3.2705	4.85621
RANBP2	0.570336	9.07e-15	5.82e-14	10.1231	15.0315
ERICH6-AS1	0.570363	0.000411	0.000622	0.153119	0.227366
ELK1	0.570391	4.29e-18	4.85e-17	19.5858	29.0835
VTA1	0.570395	1.04e-12	4.93e-12	9.20264	13.6653
FXYD7	0.570429	0.000659	0.000971	0.109783	0.163024
RNFT1	0.570452	5.38e-12	2.3e-11	7.19888	10.6903
IL17RE	0.570523	0.000973	0.001402	6.07916	9.02792
GNRHR2	0.570534	1.73e-11	6.93e-11	0.598685	0.889092
ZNF197	0.57057	2.82e-14	1.68e-13	3.40696	5.05971
ZNF282	0.570677	3.05e-16	2.48e-15	18.3233	27.2141
PRIMPOL	0.570692	4.73e-09	1.39e-08	3.2743	4.86311
RPS3AP21	0.570712	0.000227	0.000356	0.539083	0.800677
HES6	0.570797	1.63e-07	3.89e-07	9.59212	14.2476
WFDC2	0.570818	0.001836	0.00255	13.6663	20.2994
MAP2K1	0.570886	3.61e-13	1.82e-12	23.7455	35.2724
NSMF	0.570888	5.78e-07	1.28e-06	16.654	24.7384
CIDECP1	0.570888	5.25e-13	2.59e-12	5.35201	7.95008
AP000553.4	0.57096	0.002443	0.003337	0.781588	1.16106
ICMT	0.570971	2.9e-13	1.49e-12	21.5643	32.0343
AL157834.4	0.571064	0.002235	0.003068	0.282885	0.420259
PIGA	0.571115	4.11e-12	1.78e-11	3.04226	4.5198
TENT4A	0.571164	6.64e-13	3.23e-12	8.60396	12.7831
DUSP19	0.571194	5.05e-08	1.29e-07	0.919277	1.36582
AC091178.2	0.571274	0.000761	0.001113	0.389822	0.57921
DDX18	0.571291	5.05e-16	3.97e-15	14.5417	21.6069
AL451007.1	0.571352	0.000678	0.000997	0.589983	0.876665
LINC00475	0.571365	0.012001	0.014963	0.054612	0.08115
PERP	0.571498	1.04e-07	2.56e-07	82.1211	122.037
GDAP2	0.571576	1.47e-12	6.78e-12	2.40292	3.57109
AC116667.1	0.571579	1.52e-08	4.16e-08	0.588575	0.87471
GPN1	0.571589	9.15e-16	6.93e-15	12.5036	18.5824
LINC00514	0.571592	0.002457	0.003355	0.386335	0.574157
FAM149B1	0.571712	1.92e-14	1.17e-13	4.47743	6.65475
KCTD3	0.571814	5.88e-12	2.5e-11	52.7338	78.3832
CEACAM4	0.571856	0.03759	0.044005	0.378925	0.563247
AP2M1	0.571976	1.84e-13	9.68e-13	108.591	161.427
SPCS2	0.572071	6.02e-18	6.64e-17	34.5362	51.3434
BRMS1L	0.572141	5.78e-13	2.83e-12	2.73535	4.06671
AL139805.1	0.57215	0.000169	0.00027	0.182898	0.271922
TXK	0.572201	0.003365	0.004508	0.348883	0.518716
SLC25A40	0.57221	9e-12	3.74e-11	5.34933	7.95339
VPS41	0.572254	6.25e-12	2.65e-11	10.8232	16.0925
IGLV2-14	0.57228	0.01557	0.019115	54.1374	80.4953
FCRL6	0.57236	0.039223	0.045828	0.655172	0.97421
CDC73	0.572361	1.84e-15	1.32e-14	6.57008	9.76942
RPL7AP9	0.572369	0.001934	0.002678	0.084144	0.125118
SNRPA1P1	0.57255	0.000348	0.000533	0.132667	0.197296
PRCC	0.572593	2.99e-14	1.77e-13	38.8837	57.8277
AC132938.2	0.572617	2.55e-05	4.56e-05	0.159629	0.237403
KDM1B	0.572707	3.34e-11	1.29e-10	5.62509	8.36627
DSTNP2	0.572876	7.1e-09	2.03e-08	6.41247	9.53846
DCLRE1A	0.572895	1.43e-12	6.6e-12	6.00826	8.93732
AC002310.5	0.572909	4.74e-06	9.32e-06	1.7924	2.66624
PDCD10	0.572988	6.51e-15	4.26e-14	13.6474	20.3019
RHOBTB3	0.573054	7.25e-08	1.82e-07	14.0303	20.8725
SNHG22	0.573212	8.66e-08	2.15e-07	0.181282	0.269718
ZNF467	0.573237	0.000983	0.001416	9.65942	14.3719
AP3D1	0.573278	1.13e-18	1.45e-17	40.0342	59.5669
TTC27	0.573294	2.68e-16	2.21e-15	10.1312	15.0744
EEF1A1P29	0.573328	0.001095	0.001568	0.276159	0.410911
AL161756.3	0.573436	2.87e-06	5.81e-06	0.163636	0.243501
AL021997.1	0.573443	3.29e-06	6.59e-06	0.543933	0.809411
ZBTB3	0.573536	1.43e-17	1.47e-16	2.56121	3.81151
NUS1P1	0.573593	2.51e-06	5.11e-06	1.62258	2.41477
FCHO2	0.57369	3.33e-12	1.47e-11	8.57307	12.7595
CLIC4	0.573717	5.25e-07	1.17e-06	33.4973	49.8558
MED13	0.573747	3.41e-12	1.5e-11	10.4055	15.4875
CD69	0.573819	0.000196	0.00031	2.02328	3.01157
GSTT2	0.573875	0.015297	0.018795	0.227905	0.339241
BRF1	0.573876	7.31e-23	2.44e-21	4.15779	6.18894
AC021701.1	0.573927	2.69e-05	4.79e-05	0.051492	0.076649
LINC00888	0.574001	2.81e-10	9.63e-10	4.38415	6.52645
UBR7	0.574016	8.8e-16	6.67e-15	14.432	21.4844
AL355355.2	0.574062	3.82e-07	8.69e-07	1.35091	2.01111
MYO1C	0.574084	9.36e-11	3.41e-10	40.5175	60.3196
TMTC3	0.574132	3.53e-12	1.55e-11	4.60565	6.8568
[truncated: 15,109 more rows]

## Sheet: Table S9
The top 15 KEGG pathways
ID	Description	setSize	enrichmentScore	NES	pvalue	p.adjust	qvalues	rank	leading_edge	core_enrichment
hsa05033	Nicotine addiction	26	0.651849	2.4315	0.00104275	0.0510949	0.0455518	2364	tags=69%, list=18%, signal=57%	GABRP/GRIA4/CACNA1B/GRIA2/GRIN2A/GABRG1/GABRA2/CHRNA7/SLC17A7/GABRA3/GRIN2B/GABRB1/GABRR1/GABRE/GABRB3/GABRB2/GRIN1/GABRG3
hsa04080	Neuroactive ligand-receptor interaction	158	0.480171	2.33282	0.000999001	0.0510949	0.0455518	2862	tags=49%, list=22%, signal=38%	PRSS2/CHRNA1/GABRP/SCTR/NMU/GRM3/GRIA4/SSTR3/LEP/AVPR1B/CALCR/GRM1/GRIA2/GLP1R/GIPR/GRM6/P2RY4/VIPR2/OXTR/HTR1F/GRIN2A/LYPD6/LYPD6B/GRM8/UTS2R/LPAR2/ADORA2B/NTS/ADORA1/CHRND/GABRG1/GABRA2/CHRNA7/RXFP4/LPAR1/GABBR1/HRH2/DRD4/SSTR5/GABRA3/GPR83/GRIN2B/VIP/RLN2/GABRB1/CHRM4/NPFFR1/GRIK1/GABRR1/GABRE/GRIK4/GABRB3/SCT/GABRB2/BDKRB1/CHRNA3/INSL3/GPR156/TACR2/GRIN1/GLRA3/GLP2R/GABRG3/UTS2B/HTR6/NTSR1/GR…
hsa04742	Taste transduction	36	0.553819	2.21145	0.00102041	0.0510949	0.0455518	3027	tags=64%, list=23%, signal=49%	HCN4/GRM1/P2RY4/HTR1F/ITPR3/SCN3A/GABRA2/CALHM1/GABBR1/TAS2R5/GABRA3/SCN2A/TAS2R31/TAS2R4/PLCB4/KCNK5/GNB3/TRPM5/TAS2R19/TAS2R20/GRM4/ENTPD2/PLCB1
hsa04974	Protein digestion and absorption	56	0.467613	2.01226	0.00100402	0.0510949	0.0455518	4749	tags=70%, list=37%, signal=44%	PRSS2/CPA2/COL11A1/COL9A2/COL11A2/SLC8A2/MEP1A/COL10A1/COL8A2/COL24A1/FXYD2/COL17A1/ATP1A4/KCNQ1/COL20A1/SLC3A1/SLC1A5/KCNN4/COL28A1/COL2A1/KCNK5/SLC7A8/PGA5/COL16A1/SLC8A3/COL3A1/ATP1A1/COL6A3/COL1A2/COL27A1/COL5A2/COL4A6/SLC7A7/SLC36A1/COL5A1/COL9A1/ATP1B2/COL13A1/COL1A1
hsa04723	Retrograde endocannabinoid signaling	60	0.44044	1.91526	0.001001	0.0510949	0.0455518	2027	tags=38%, list=16%, signal=32%	GABRP/GRIA4/CACNA1B/GRM1/GRIA2/ITPR3/GABRG1/GABRA2/MAPK13/ADCY2/SLC17A7/MAPK10/GABRA3/GABRB1/GABRR1/GABRE/RIMS1/GABRB3/DAGLA/GABRB2/PLCB4/CACNA1D/GNB3
hsa04972	Pancreatic secretion	47	0.435193	1.81733	0.00201613	0.0661269	0.0589531	3685	tags=53%, list=29%, signal=38%	PRSS2/SCTR/CPA2/CFTR/ITPR3/FXYD2/ADCY2/ATP1A4/RAB27B/KCNQ1/PLA2G2D/SCT/RYR2/PLCB4/CD38/SLC12A2/TPCN2/TRPC1/SLC9A1/PLCB1/PLA2G10/ATP1A1/ATP2A1/RAB3D/ADCY7
hsa00601	Glycosphingolipid biosynthesis - lacto and neolacto series	17	0.533835	1.79337	0.00771775	0.187182	0.166875	2925	tags=53%, list=23%, signal=41%	B3GALT5/FUT3/B3GALT2/B3GNT3/FUT4/FUT2/ST8SIA1/B3GALNT1/FUT1
hsa04657	IL-17 signaling pathway	54	0.415436	1.77142	0.0020141	0.0661269	0.0589531	2059	tags=30%, list=16%, signal=25%	MUC5AC/IL13/CXCL5/MMP1/MAPK15/MUC5B/CXCL1/CXCL3/MAPK13/MAPK10/CXCL6/TNF/CXCL8/MMP9/TRAF5/IKBKE
hsa04970	Salivary secretion	45	0.423347	1.74909	0.00202429	0.0661269	0.0589531	3052	tags=44%, list=24%, signal=34%	DMBT1/PRKG2/TRPV6/LPO/MUC5B/ITPR3/FXYD2/ADCY2/ATP1A4/CST5/KCNN4/CST2/CALML4/PLCB4/CD38/SLC12A2/LYZ/SLC9A1/PLCB1/RYR3
hsa04727	GABAergic synapse	44	0.414354	1.70548	0.00809717	0.187182	0.166875	2698	tags=43%, list=21%, signal=34%	GABRP/CACNA1B/GABRG1/GABRA2/ADCY2/HAP1/GABBR1/GABRA3/GABRB1/GABRR1/GABRE/GABRB3/SLC38A1/GABRB2/CACNA1D/GNB3/GABRG3/GLS/GNG3
hsa03320	PPAR signaling pathway	29	0.445289	1.69806	0.0113872	0.187182	0.166875	2539	tags=38%, list=20%, signal=31%	FABP7/MMP1/SCD5/OLR1/ACSBG1/FABP6/FABP3/ILK/CPT1B/ACSL4/ACSBG2
hsa05323	Rheumatoid arthritis	47	0.398524	1.66421	0.0120968	0.187182	0.166875	3746	tags=49%, list=29%, signal=35%	IL11/CXCL5/MMP1/CTSK/ATP6V0A4/CXCL1/TGFB2/CXCL3/ATP6V0D2/IL1A/LTB/CXCL6/TNF/CXCL8/TNFRSF11A/IL18/ATP6V1C2/CD80/IL1B/TGFB1/CCL20/CSF2/CCL2
hsa04978	Mineral absorption	29	0.431754	1.64645	0.0196687	0.251282	0.224022	848	tags=24%, list=7%, signal=23%	SLC26A9/SLC34A2/SLC5A1/TRPV6/SLC8A2/FXYD2/ATP1A4
hsa04512	ECM-receptor interaction	57	0.382399	1.64505	0.0110553	0.187182	0.166875	1872	tags=30%, list=15%, signal=26%	IBSP/LAMA1/ITGB6/LAMC2/COL9A2/FRAS1/ITGA3/LAMB4/ITGB8/FREM1/ITGB4/TNC/COMP/SV2A/DMP1/COL2A1/LAMA5
hsa04730	Long-term depression	37	0.407286	1.63367	0.019368	0.251282	0.224022	990	tags=24%, list=8%, signal=23%	PLA2G4F/PRKG2/GRM1/GRIA2/ITPR3/RYR1/PLA2G4D/IGF1R/PLA2G4E
The top 15 GO items
ONTOLOGY	ID	Description	setSize	enrichmentScore	NES	pvalue	p.adjust	qvalues	rank	leading_edge	core_enrichment
BP	GO:0007156	homophilic cell adhesion via plasma membrane adhesion molecules	118	0.448465	2.1475	0.000999001	0.00794215	0.0061853	4180	tags=58%, list=32%, signal=40%	CEACAM5/IGFN1/CEACAM6/IGSF11/TENM3/PCDH19/L1CAM/DSC3/NECTIN4/CDH3/PCDH10/PCDHA4/PCDHA7/PLXNB3/CDHR1/ROBO2/KIRREL3/PCDHA2/PCDHA6/PCDHA5/DSCAML1/DCHS2/PCDHA3/CDH26/CDHR4/PCDHB6/PCDHGA11/FAT3/CDH17/PCDHGB3/PCDHB10/PCDHGC4/PCDHGC5/CDH6/CADM3/PCDHB2/DSG2/PCDHA11/PCDHGA6/PCDHA13/CNTN6/PCDH9/SDK1/PCDHB9/CDH20/PCDHGA7/CELSR3/CDH16/PCDHB15/PCDHAC2/EMB/CDH24/MPZL2/PCDHB18P/PCDHGA12/PCDHB5/PCDHA12/CDH19/CLS…
CC	GO:0034703	cation channel complex	123	0.444999	2.13806	0.001	0.00794215	0.0061853	3761	tags=56%, list=29%, signal=40%	GRIA4/SCN1A/SCN5A/CACNA1B/HCN4/TRPC7/TRPV6/KCNH2/GRIA2/SCN2B/TRPC3/ABCC8/KCNA6/GRIN2A/KCNK2/SCN3A/SHISA9/RYR1/KCNS1/KCND2/KCNQ5/KCNJ16/KCNQ1/KCNG1/GRIN2B/KCNN4/SCN2A/KCNIP4/CACNG8/CACHD1/GRIK4/DPP10/KCNQ4/DLG3/KCNV2/CACNB1/CNGB1/KCNQ3/RYR2/CACNA1D/CNGB3/CACNB3/CATSPERB/GRIN1/KCNJ11/KCNMB4/KCNAB3/TRPC1/SCN3B/SHISA8/GRIK2/KCNS3/KCNJ1/KCNA7/KCNIP2/CNIH2/RYR3/CACNG4/CACNA1G/KCNA2/KCND1/ATP2A1/KCNC4/G…
CC	GO:0034702	ion channel complex	166	0.443398	2.17262	0.000999001	0.00794215	0.0061853	3679	tags=55%, list=29%, signal=40%	CHRNA1/GABRP/CFTR/GRIA4/TTYH1/SCN1A/SCN5A/CACNA1B/HCN4/TRPC7/TRPV6/KCNH2/GRIA2/SCN2B/TRPC3/ABCC8/KCNA6/GRIN2A/KCNK2/SCN3A/SHISA9/RYR1/KCNS1/KCND2/GABRG1/GABRA2/KCNQ5/CHRNA7/KCNJ16/KCNQ1/CLCNKB/KCNG1/GABRA3/GRIN2B/KCNN4/GABRB1/SCN2A/KCNIP4/GABRR1/CACNG8/CACHD1/GABRE/GRIK4/DPP10/KCNQ4/DLG3/KCNV2/GABRB3/CLDN4/CACNB1/CNGB1/KCNQ3/RYR2/GABRB2/CACNA1D/CNGB3/CHRNA3/CACNB3/CATSPERB/GRIN1/KCNJ11/GLRA3/GABR…
MF	GO:0022836	gated channel activity	196	0.437455	2.16317	0.000999001	0.00794215	0.0061853	3679	tags=55%, list=29%, signal=40%	CHRNA1/GABRP/CFTR/GRIA4/TTYH1/SCN1A/SCN5A/CACNA1B/HCN4/KCNH2/ANO9/GRIA2/SCN2B/ABCC8/KCNH3/TMC4/KCNH8/KCNA6/SNAP25/GRIN2A/KCNK2/ITPR3/SCN3A/KCNK12/RYR1/CHRND/KCNS1/KCND2/ASIC4/GABRG1/TRPA1/ANO4/GABRA2/KCNQ5/NALCN/CALHM1/CHRNA7/KCNJ16/KCNQ1/CLCNKB/KCNG1/TMC2/GABRA3/MCOLN3/GRIN2B/KCNN4/PEX5L/GABRB1/TMC3/SCN2A/KCNIP4/GRIK1/GABRR1/CACNG8/CACHD1/GABRE/GRIK4/KCNQ4/KCNV2/GABRB3/KCNK10/CACNB1/CNGB1/KCNQ3/…
BP	GO:0043583	ear development	132	0.434107	2.09672	0.000999001	0.00794215	0.0061853	2124	tags=36%, list=16%, signal=31%	STRC/HMX3/EYA1/CALB1/ESRP1/SOX2/COL11A1/TWIST1/SIX2/TFAP2A/ATP8A2/GJB6/STRA6/NKX3-2/KCNK2/TGFB2/DDR1/FGF9/FZD2/SLC44A4/TBX18/KCNQ1/GLI3/SOBP/DLX6/SOX9/PTK7/LHFPL5/MCOLN3/DLX5/SIX4/ROR2/NOG/WNT1/SLITRK6/BMP5/KCNQ4/HOXA2/COL2A1/JAG1/OTX1/GABRB2/PRRX1/FGFR2/HOXA1/CTHRC1/SIX1/LRIG3
CC	GO:1902495	transmembrane transporter complex	180	0.430843	2.11964	0.000999001	0.00794215	0.0061853	3679	tags=53%, list=29%, signal=39%	CHRNA1/GABRP/CFTR/GRIA4/TTYH1/SCN1A/SCN5A/CACNA1B/HCN4/TRPC7/TRPV6/KCNH2/GRIA2/SCN2B/TRPC3/ABCC8/KCNA6/GRIN2A/KCNK2/SCN3A/SHISA9/RYR1/KCNS1/KCND2/GABRG1/GABRA2/KCNQ5/FXYD2/ATP1A4/CHRNA7/KCNJ16/KCNQ1/CLCNKB/KCNG1/GABRA3/GRIN2B/KCNN4/GABRB1/SCN2A/KCNIP4/GABRR1/CACNG8/CACHD1/GABRE/GRIK4/DPP10/KCNQ4/DLG3/KCNV2/GABRB3/CLDN4/CACNB1/CNGB1/KCNQ3/RYR2/GABRB2/CACNA1D/CNGB3/CHRNA3/CACNB3/CATSPERB/GRIN1/KCNJ…
BP	GO:0048562	embryonic organ morphogenesis	194	0.429434	2.12378	0.000999001	0.00794215	0.0061853	2160	tags=37%, list=17%, signal=31%	STRC/HOXB9/HMX3/ALX4/EYA1/GRHL2/COL11A1/TWIST1/HOXB8/NDRG4/SIX2/TFAP2A/BMP7/ATP8A2/FOXF2/PAX6/OVOL2/GJB6/STRA6/NKX3-2/SHOX2/HOXA6/DSCAML1/MDFI/FBN2/FGF9/FOLR1/FZD2/HOXA11/SLC44A4/TBX18/CRB2/KCNQ1/HOXA7/GLI3/HOXB6/SOBP/DLX6/RUNX2/SOX9/PTK7/MMP14/LHFPL5/MFAP2/TH/HOXB7/HNF1B/DLX5/SIX4/VANGL2/ROR2/PAX5/NOG/WNT1/SLITRK6/SOX11/HOXB3/KCNQ4/HOXA2/GLI1/COL2A1/OTX1/RYR2/PRRX1/FGFR2/HOXA1/CTHRC1/SIX1/LRIG3/…
BP	GO:0048839	inner ear development	112	0.426526	2.02595	0.001	0.00794215	0.0061853	2124	tags=36%, list=16%, signal=30%	STRC/HMX3/EYA1/CALB1/ESRP1/SOX2/COL11A1/TFAP2A/ATP8A2/GJB6/KCNK2/TGFB2/FGF9/FZD2/SLC44A4/TBX18/KCNQ1/GLI3/SOBP/DLX6/SOX9/PTK7/LHFPL5/MCOLN3/DLX5/SIX4/ROR2/WNT1/SLITRK6/KCNQ4/COL2A1/JAG1/OTX1/GABRB2/PRRX1/FGFR2/HOXA1/CTHRC1/SIX1/LRIG3
MF	GO:0005216	ion channel activity	239	0.426274	2.13965	0.000999001	0.00794215	0.0061853	3277	tags=49%, list=25%, signal=37%	CHRNA1/SLC26A9/GABRP/CFTR/GRIA4/TTYH1/SCN1A/SCN5A/CACNA1B/HCN4/TRPC7/TRPV6/SLC24A2/KCNH2/ANO9/GRIA2/SCN2B/FXYD3/SLC9C1/TRPC3/ABCC8/KCNH3/TMC4/KCNH8/KCNA6/SNAP25/GRIN2A/SLC4A11/KCNK2/ITPR3/SCN3A/KCNK12/RYR1/CHRND/KCNS1/KCND2/ASIC4/GABRG1/TRPA1/ANO4/GABRA2/KCNQ5/NALCN/CALHM1/CHRNA7/SLC24A3/KCNJ16/KCNQ1/CLCNKB/KCNG1/TMC2/GABRA3/MCOLN3/GRIN2B/KCNN4/PEX5L/GABRB1/KCNK15/TMC3/SCN2A/KCNIP4/GRIK1/GABRR1/C…
MF	GO:0005261	cation channel activity	184	0.424816	2.0957	0.000999001	0.00794215	0.0061853	3334	tags=49%, list=26%, signal=37%	CHRNA1/GRIA4/SCN1A/SCN5A/CACNA1B/HCN4/TRPC7/TRPV6/SLC24A2/KCNH2/GRIA2/SCN2B/TRPC3/ABCC8/KCNH3/KCNH8/KCNA6/SNAP25/GRIN2A/SLC4A11/KCNK2/ITPR3/SCN3A/KCNK12/RYR1/CHRND/KCNS1/KCND2/ASIC4/TRPA1/KCNQ5/NALCN/CALHM1/CHRNA7/SLC24A3/KCNJ16/KCNQ1/KCNG1/TMC2/MCOLN3/GRIN2B/KCNN4/PEX5L/KCNK15/SCN2A/KCNIP4/GRIK1/CACNG8/CACHD1/GRIK4/KCNQ4/KCNV2/KCNK10/CACNB1/CNGB1/KCNQ3/RYR2/KCNK5/CACNA1D/CNGB3/CHRNA3/TRPV4/TRPM5…
BP	GO:0090596	sensory organ morphogenesis	168	0.424039	2.08096	0.000999001	0.00794215	0.0061853	2317	tags=37%, list=18%, signal=31%	STRC/IGFN1/HMX3/EYA1/CALB1/TENM3/COL11A1/TWIST1/PROM1/PITX2/SIX2/CYP26B1/TFAP2A/BMP7/ATP8A2/FOXF2/PAX6/GJB6/STRA6/NKX3-2/TULP1/FBN2/FGF9/COL8A2/LCTL/FZD2/SLC44A4/WNT2B/TBX18/CRB2/KCNQ1/GLI3/SOBP/DLX6/SOX9/PTK7/LHFPL5/MFAP2/TH/DLX5/SIX4/ROR2/FSCN2/NOG/WNT1/SLITRK6/SOX11/KCNQ4/HOXA2/COL2A1/JAG1/OTX1/PRRX1/FGFR2/HOXA1/CTHRC1/SIX1/LRIG3/FOXN4/FJX1/TMIE/SDK1
BP	GO:0048705	skeletal system morphogenesis	153	0.423945	2.06938	0.000999001	0.00794215	0.0061853	2054	tags=36%, list=16%, signal=31%	HOXB9/ALX4/EYA1/GRHL2/COL11A1/TWIST1/HOXB8/SIX2/BARX2/CYP26B1/TFAP2A/BMP7/RFLNA/NKX3-2/BMPR1B/SHOX2/HOXA6/FREM1/MSX2/DSCAML1/MDFI/FBN2/SFRP2/HOXA11/HOXA7/GLI3/COMP/HOXB6/SMPD3/RUNX2/SOX9/MMP14/FGFR1/HOXB7/DLX5/FGFR3/SIX4/ROR2/FMN1/PAX5/NOG/SOX11/MATN1/HOXB3/GREM1/HOXA2/SPEF2/COL2A1/PRRX1/FGFR2/MMP2/IFT80/HOXA1/TRPV4/SIX1
BP	GO:0048736	appendage development	120	0.41922	2.0148	0.000999001	0.00794215	0.0061853	1953	tags=34%, list=15%, signal=29%	ALX4/GRHL2/TWIST1/PITX2/SP8/CYP26B1/TFAP2A/SALL4/BMP7/FOXN1/FRAS1/SEMA3C/SHOX2/RSPO4/HOXC10/MSX2/TGFB2/FBN2/FGF9/SFRP2/SOX4/CRABP2/HOXA11/ITGB4/GLI3/COMP/DLX6/RUNX2/SOX9/DLX5/ROR2/FMN1/NOG/PITX1/SOX11/GREM1/PKDCC/COL2A1/PRRX1/FGFR2/IFT80
BP	GO:0060173	limb development	120	0.41922	2.0148	0.000999001	0.00794215	0.0061853	1953	tags=34%, list=15%, signal=29%	ALX4/GRHL2/TWIST1/PITX2/SP8/CYP26B1/TFAP2A/SALL4/BMP7/FOXN1/FRAS1/SEMA3C/SHOX2/RSPO4/HOXC10/MSX2/TGFB2/FBN2/FGF9/SFRP2/SOX4/CRABP2/HOXA11/ITGB4/GLI3/COMP/DLX6/RUNX2/SOX9/DLX5/ROR2/FMN1/NOG/PITX1/SOX11/GREM1/PKDCC/COL2A1/PRRX1/FGFR2/IFT80
BP	GO:0007416	synapse assembly	105	0.417844	1.97297	0.000999001	0.00794215	0.0061853	2447	tags=39%, list=19%, signal=32%	IGFN1/ST8SIA2/NPTX1/SLITRK2/NLGN1/LRRN1/BDNF/ROBO2/NTRK1/EFNA5/KIRREL3/VSTM5/OXTR/EPHB3/GAP43/SLIT1/TPBG/GABRA2/PCLO/PCDHB6/DNER/NRXN1/SLITRK5/SNCA/ADD2/LHFPL4/SRPX2/SIX4/PCDHB10/FLRT2/SLITRK6/LRFN4/PCDHB2/FZD1/GABRB3/GABRB2/SIX1/SDK1/PCDHB9/LGI2/DKK1

[truncated: 1 more sheets: Table S10]
